# Supplementary material for: Global within-species phylogenetics of sewage microbes suggest that local adaptation shapes geographical bacterial clustering
Source: Commun Biol. 2023 Jul 8;6:700. doi: 10.1038/s42003-023-05083-8 (PMC10329687; doi:10.1038/s42003-023-05083-8)
Supplement: Supplementary file 6 — Supplementary Data 3 [file 42003_2023_5083_MOESM6_ESM.xlsx]

## Sheet: Ark1
country_alpha3	new_complete_name	unique_sample_id	country	country_alpha2	city	latitude_inferred	longtitude_inferred	year	collection_date	collected_by	isolation_source	organism	ena_sample_acc	ena_experiment_acc	ena_run_acc	sequencing_platform	sequencing_type	instrument_model	Region
ALB	DTU_2017_537_1_MG_AL_TI_233	2017_nov_alb_01	Albania	AL	Tirana	41.32	19.9	17	2017-11-20	Global sewage consortium	wastewater	wastewater metagenome	ERS5186497	ERX4603826	ERR4682374	Illumina	paired	Illumina NovaSeq 6000	Europe & Central Asia
ALB	DTU_2016_2_2_MG_ALB-17_1	2016_pil_alb_01	Albania	AL	Tirana	41.32	19.9	16	2016-01-02	Global sewage consortium	wastewater	wastewater metagenome	ERS2520861	ERX2624027	ERR2607371	Illumina	paired	Illumina HiSeq 3000	Europe & Central Asia
ALB	DTU_2016_3_3_MG_ALB-17_2	2016_pil_alb_01	Albania	AL	Tirana	41.32	19.9	16	2016-01-02	Global sewage consortium	wastewater	wastewater metagenome	ERS2520862	ERX2624028	ERR2607372	Illumina	paired	Illumina HiSeq 3000	Europe & Central Asia
ALB	DTU_2017_340_1_MG_AL_TI	2017_jun_alb_01	Albania	AL	Tirana	41.32	19.9	17	2017-06-05	Global sewage consortium	wastewater	wastewater metagenome	ERS2597415	ERX2697824	ERR2683210	Illumina	paired	Illumina NovaSeq 6000	Europe & Central Asia
ALB	DTU_2016_1_1_MG_ALB-17	2016_pil_alb_01	Albania	AL	Tirana	41.32	19.9	16	2016-01-02	Global sewage consortium	wastewater	wastewater metagenome	ERS2520863	ERX2624029	ERR2607373	Illumina	paired	Illumina HiSeq 3000	Europe & Central Asia
AUS	DTU_2017_384_1_MG_AU_DD	2017_jun_aus_02	Australia	AU	Darwin	-12.46	130.84	17	2017-06-15	Global sewage consortium	wastewater	wastewater metagenome	ERS2597464	ERX2697873	ERR2683259	Illumina	paired	Illumina NovaSeq 6000	East Asia & Pacific
AUS	DTU_2017_976_1_MG_AU1710_L21	2017_lon_aus_04	Australia	AU	Melbourne	-37.81	144.96	17	2017-10-16	Global sewage consortium	wastewater	wastewater metagenome	--	--	--	Illumina	paired	Illumina NovaSeq 6000	East Asia & Pacific
AUS	DTU_2018_1009_1_MG_AU1803_L58	2018_lon_aus_08	Australia	AU	Melbourne	-37.81	144.96	18	2018-03-27	Global sewage consortium	wastewater	wastewater metagenome	--	--	--	Illumina	paired	Illumina NovaSeq 6000	East Asia & Pacific
AUS	DTU_2018_757_1_MG_AU_ME_454	2018_jun_aus_01	Australia	AU	Melbourne	-37.81	144.96	18	2018-06-19	Global sewage consortium	wastewater	wastewater metagenome	ERS5186734	ERX4604326	ERR4682877	Illumina	paired	Illumina NovaSeq 6000	East Asia & Pacific
AUS	DTU_2018_1011_1_MG_AU1805_L60	2018_lon_aus_10	Australia	AU	Melbourne	-37.81	144.96	18	2018-05-17	Global sewage consortium	wastewater	wastewater metagenome	--	--	--	Illumina	paired	Illumina NovaSeq 6000	East Asia & Pacific
AUS	DTU_2016_241_2_MG_Reproduce_18a_3	2016_pil_aus_04	Australia	AU	Melbourne	-37.81	144.96	16	2016-08-02	Global sewage consortium	wastewater	wastewater metagenome	--	--	--	Illumina	paired	Illumina HiSeq 3000	East Asia & Pacific
AUS	DTU_2018_876_1_MG_AU_MA_560	2018_nov_aus_02	Australia	AU	Maningrida	-12.05	134.23	18	2018-12-18	Global sewage consortium	wastewater	wastewater metagenome	ERS5184549	ERX4600255	ERR4678631	Illumina	paired	Illumina NovaSeq 6000	East Asia & Pacific
AUS	DTU_2018_759_1_MG_AU_MA_456	2018_jun_aus_03	Australia	AU	Maningrida	-12.05	134.23	18	2018-07-10	Global sewage consortium	wastewater	wastewater metagenome	ERS5186736	ERX4604328	ERR4682879	Illumina	paired	Illumina NovaSeq 6000	East Asia & Pacific
AUS	DTU_2017_975_1_MG_AU1709_L20	2017_lon_aus_03	Australia	AU	Melbourne	-37.81	144.96	17	2017-09-27	Global sewage consortium	wastewater	wastewater metagenome	--	--	--	Illumina	paired	Illumina NovaSeq 6000	East Asia & Pacific
AUS	DTU_2016_13_5_MG_AUS-18a_4	2016_pil_aus_02	Australia	AU	Melbourne	-37.81	144.96	16	2016-08-02	Global sewage consortium	wastewater	wastewater metagenome	ERS2520871	ERX2624037	ERR2607381	Illumina	paired	Illumina HiSeq 3000	East Asia & Pacific
AUS	DTU_2018_1019_1_MG_AU1807_L70	2018_lon_aus_11	Australia	AU	Melbourne	-37.81	144.96	18	2018-07-19	Global sewage consortium	wastewater	wastewater metagenome	--	--	--	Illumina	paired	Illumina NovaSeq 6000	East Asia & Pacific
AUS	DTU_2018_1020_1_MG_AU1808_L71	2018_lon_aus_12	Australia	AU	Melbourne	-37.81	144.96	18	2018-08-30	Global sewage consortium	wastewater	wastewater metagenome	--	--	--	Illumina	paired	Illumina NovaSeq 6000	East Asia & Pacific
AUS	DTU_2017_383_1_MG_AU_MA	2017_jun_aus_01	Australia	AU	Maningrida	-12.05	134.23	17	2017-06-20	Global sewage consortium	wastewater	wastewater metagenome	ERS2597462	ERX2697871	ERR2683257	Illumina	paired	Illumina NovaSeq 6000	East Asia & Pacific
AUS	DTU_2018_1010_1_MG_AU1804_L59	2018_lon_aus_09	Australia	AU	Melbourne	-37.81	144.96	18	2018-04-27	Global sewage consortium	wastewater	wastewater metagenome	--	--	--	Illumina	paired	Illumina NovaSeq 6000	East Asia & Pacific
AUS	DTU_2016_5_2_MG_AUS-18_1	2016_pil_aus_01	Australia	AU	Woden	-35.35	149.09	16	2016-04-02	Global sewage consortium	wastewater	wastewater metagenome	ERS2520864	ERX2624030	ERR2607374	Illumina	paired	Illumina HiSeq 3000	East Asia & Pacific
AUS	DTU_2016_6_3_MG_AUS-18_2	2016_pil_aus_01	Australia	AU	Woden	-35.35	149.09	16	2016-04-02	Global sewage consortium	wastewater	wastewater metagenome	ERS2520865	ERX2624031	ERR2607375	Illumina	paired	Illumina HiSeq 3000	East Asia & Pacific
AUS	DTU_2016_7_4_MG_AUS-18_3	2016_pil_aus_01	Australia	AU	Woden	-35.35	149.09	16	2016-04-02	Global sewage consortium	wastewater	wastewater metagenome	ERS2520866	ERX2624032	ERR2607376	Illumina	paired	Illumina HiSeq 3000	East Asia & Pacific
AUS	DTU_2018_1000_1_MG_AU1802_L45	2018_lon_aus_07	Australia	AU	Melbourne	-37.81	144.96	18	2018-02-26	Global sewage consortium	wastewater	wastewater metagenome	--	--	--	Illumina	paired	Illumina NovaSeq 6000	East Asia & Pacific
AUS	DTU_2017_558_1_MG_AU_ME_254	2017_jun_aus_04	Australia	AU	Melbourne	-37.81	144.96	17	2017-05-12	Global sewage consortium	wastewater	wastewater metagenome	--	--	--	Illumina	paired	Illumina NovaSeq 6000	East Asia & Pacific
AUS	DTU_2017_501_1_MG_AU_MA_197	2017_nov_aus_02	Australia	AU	Maningrida	-12.05	134.23	17	2017-11-22	Global sewage consortium	wastewater	wastewater metagenome	ERS5186465	ERX4603794	ERR4682342	Illumina	paired	Illumina NovaSeq 6000	East Asia & Pacific
AUS	DTU_2018_875_1_MG_AU_DD_559	2018_nov_aus_01	Australia	AU	Darwin	-12.46	130.84	18	2018-12-18	Global sewage consortium	wastewater	wastewater metagenome	ERS5184548	ERX4600254	ERR4678630	Illumina	paired	Illumina NovaSeq 6000	East Asia & Pacific
AUS	DTU_2016_12_4_MG_AUS-18a_3	2016_pil_aus_02	Australia	AU	Melbourne	-37.81	144.96	16	2016-08-02	Global sewage consortium	wastewater	wastewater metagenome	ERS2520870	ERX2624036	ERR2607380	Illumina	paired	Illumina HiSeq 3000	East Asia & Pacific
AUS	DTU_2016_4_1_MG_AUS-18	2016_pil_aus_01	Australia	AU	Woden	-35.35	149.09	16	2016-04-02	Global sewage consortium	wastewater	wastewater metagenome	ERS2520873	ERX2624039	ERR2607383	Illumina	paired	Illumina HiSeq 3000	East Asia & Pacific
AUS	DTU_2017_437_1_MG_AU_ME	2017_jun_aus_03	Australia	AU	Melbourne	-37.81	144.96	17	2017-06-14	Global sewage consortium	wastewater	wastewater metagenome	ERS2597354	ERX2697763	ERR2683149	Illumina	paired	Illumina NovaSeq 6000	East Asia & Pacific
AUS	DTU_2016_11_3_MG_AUS-18a_2	2016_pil_aus_02	Australia	AU	Melbourne	-37.81	144.96	16	2016-08-02	Global sewage consortium	wastewater	wastewater metagenome	ERS2520869	ERX2624035	ERR2607379	Illumina	paired	Illumina HiSeq 3000	East Asia & Pacific
AUS	DTU_2016_240_1_MG_Reproduce_18a_1	2016_pil_aus_03	Australia	AU	Melbourne	-37.81	144.96	16	2016-08-02	Global sewage consortium	wastewater	wastewater metagenome	--	--	--	Illumina	paired	Illumina HiSeq 3000	East Asia & Pacific
AUS	DTU_2017_960_1_MG_AU1708_L2	2017_lon_aus_02	Australia	AU	Melbourne	-37.81	144.96	17	2017-08-16	Global sewage consortium	wastewater	wastewater metagenome	--	--	--	Illumina	paired	Illumina NovaSeq 6000	East Asia & Pacific
AUS	DTU_2017_500_1_MG_AU_DD_196	2017_nov_aus_01	Australia	AU	Darwin	-12.46	130.84	17	2017-11-21	Global sewage consortium	wastewater	wastewater metagenome	ERS5186464	ERX4603793	ERR4682341	Illumina	paired	Illumina NovaSeq 6000	East Asia & Pacific
AUS	DTU_2016_8_5_MG_AUS-18_4	2016_pil_aus_01	Australia	AU	Woden	-35.35	149.09	16	2016-04-02	Global sewage consortium	wastewater	wastewater metagenome	ERS2520867	ERX2624033	ERR2607377	Illumina	paired	Illumina HiSeq 3000	East Asia & Pacific
AUS	DTU_2017_959_1_MG_AU1707_L1	2017_lon_aus_01	Australia	AU	Melbourne	-37.81	144.96	17	2017-07-18	Global sewage consortium	wastewater	wastewater metagenome	--	--	--	Illumina	paired	Illumina NovaSeq 6000	East Asia & Pacific
AUS	DTU_2016_10_2_MG_AUS-18a_1	2016_pil_aus_02	Australia	AU	Melbourne	-37.81	144.96	16	2016-08-02	Global sewage consortium	wastewater	wastewater metagenome	ERS2520868	ERX2624034	ERR2607378	Illumina	paired	Illumina HiSeq 3000	East Asia & Pacific
AUS	DTU_2017_998_1_MG_AU1712_L43	2017_lon_aus_05	Australia	AU	Melbourne	-37.81	144.96	17	2017-12-21	Global sewage consortium	wastewater	wastewater metagenome	--	--	--	Illumina	paired	Illumina NovaSeq 6000	East Asia & Pacific
AUS	DTU_2018_758_1_MG_AU_DD_455	2018_jun_aus_02	Australia	AU	Darwin	-12.46	130.84	18	2018-07-10	Global sewage consortium	wastewater	wastewater metagenome	ERS5186735	ERX4604327	ERR4682878	Illumina	paired	Illumina NovaSeq 6000	East Asia & Pacific
AUS	DTU_2016_9_1_MG_AUS-18a	2016_pil_aus_02	Australia	AU	Melbourne	-37.81	144.96	16	2016-08-02	Global sewage consortium	wastewater	wastewater metagenome	ERS2520872	ERX2624038	ERR2607382	Illumina	paired	Illumina HiSeq 3000	East Asia & Pacific
AUS	DTU_2018_999_1_MG_AU1801_L44	2018_lon_aus_06	Australia	AU	Melbourne	-37.81	144.96	18	2018-01-23	Global sewage consortium	wastewater	wastewater metagenome	--	--	--	Illumina	paired	Illumina NovaSeq 6000	East Asia & Pacific
AUT	DTU_2017_493_1_MG_AT_VI_189	2017_nov_aut_01	Austria	AT	Vienna	48.21	16.37	17	2017-11-21	Global sewage consortium	wastewater	wastewater metagenome	ERS5186457	ERX4603786	ERR4682334	Illumina	paired	Illumina NovaSeq 6000	Europe & Central Asia
AUT	DTU_2017_354_1_MG_AT_VI	2017_jun_aut_01	Austria	AT	Vienna	48.21	16.37	17	2017-06-07	Global sewage consortium	wastewater	wastewater metagenome	ERS2597431	ERX2697840	ERR2683226	Illumina	paired	Illumina NovaSeq 6000	Europe & Central Asia
AUT	DTU_2018_666_1_MG_AT_VI_354	2018_jun_aut_01	Austria	AT	Vienna	48.21	16.37	18	2018-06-21	Global sewage consortium	wastewater	wastewater metagenome	ERS5186648	ERX4604240	ERR4682791	Illumina	paired	Illumina NovaSeq 6000	Europe & Central Asia
AUT	DTU_2018_799_1_MG_AT_VI_483	2018_nov_aut_01	Austria	AT	Vienna	48.21	16.37	18	2018-11-08	Global sewage consortium	wastewater	wastewater metagenome	ERS5184476	ERX4600182	ERR4678558	Illumina	paired	Illumina NovaSeq 6000	Europe & Central Asia
AUT	DTU_2016_16_3_MG_AUT-70_2	2016_pil_aut_01	Austria	AT	Vienna	48.21	16.37	16	2016-02-16	Global sewage consortium	wastewater	wastewater metagenome	ERS2520875	ERX2624041	ERR2607385	Illumina	paired	Illumina HiSeq 3000	Europe & Central Asia
AUT	DTU_2016_17_4_MG_AUT-70_3	2016_pil_aut_01	Austria	AT	Vienna	48.21	16.37	16	2016-02-16	Global sewage consortium	wastewater	wastewater metagenome	ERS2520876	ERX2624042	ERR2607386	Illumina	paired	Illumina HiSeq 3000	Europe & Central Asia
AUT	DTU_2016_14_1_MG_AUT-70	2016_pil_aut_01	Austria	AT	Vienna	48.21	16.37	16	2016-02-16	Global sewage consortium	wastewater	wastewater metagenome	ERS2520877	ERX2624043	ERR2607387	Illumina	paired	Illumina HiSeq 3000	Europe & Central Asia
AUT	DTU_2016_15_2_MG_AUT-70_1	2016_pil_aut_01	Austria	AT	Vienna	48.21	16.37	16	2016-02-16	Global sewage consortium	wastewater	wastewater metagenome	ERS2520874	ERX2624040	ERR2607384	Illumina	paired	Illumina HiSeq 3000	Europe & Central Asia
BGR	DTU_2018_690_1_MG_BG_SO_378	2018_jun_bgr_01	Bulgaria	BG	Sofia	42.7	23.32	18	2018-06-07	Global sewage consortium	wastewater	wastewater metagenome	ERS5186670	ERX4604262	ERR4682813	Illumina	paired	Illumina NovaSeq 6000	Europe & Central Asia
BGR	DTU_2017_444_1_MG_BG_SO	2017_jun_bgr_01	Bulgaria	BG	Sofia	42.7	23.32	17	2017-06-18	Global sewage consortium	wastewater	wastewater metagenome	ERS2597362	ERX2697771	ERR2683157	Illumina	paired	Illumina NovaSeq 6000	Europe & Central Asia
BGR	DTU_2016_18_1_MG_BGR-66	2016_pil_bgr_01	Bulgaria	BG	Sofia	42.7	23.32	16	2016-02-15	Global sewage consortium	wastewater	wastewater metagenome	ERS2520881	ERX2624047	ERR2607391	Illumina	paired	Illumina HiSeq 3000	Europe & Central Asia
BGR	DTU_2016_19_2_MG_BGR-66_1	2016_pil_bgr_01	Bulgaria	BG	Sofia	42.7	23.32	16	2016-02-15	Global sewage consortium	wastewater	wastewater metagenome	ERS2520878	ERX2624044	ERR2607388	Illumina	paired	Illumina HiSeq 3000	Europe & Central Asia
BGR	DTU_2016_21_4_MG_BGR-66_3	2016_pil_bgr_01	Bulgaria	BG	Sofia	42.7	23.32	16	2016-02-15	Global sewage consortium	wastewater	wastewater metagenome	ERS2520880	ERX2624046	ERR2607390	Illumina	paired	Illumina HiSeq 3000	Europe & Central Asia
BGR	DTU_2016_20_3_MG_BGR-66_2	2016_pil_bgr_01	Bulgaria	BG	Sofia	42.7	23.32	16	2016-02-15	Global sewage consortium	wastewater	wastewater metagenome	ERS2520879	ERX2624045	ERR2607389	Illumina	paired	Illumina HiSeq 3000	Europe & Central Asia
BRA	DTU_2018_837_1_MG_BR_RJ_521	2018_nov_bra_02	Brazil	BR	Rio de Janeiro	-22.91	-43.21	18	2018	Global sewage consortium	wastewater	wastewater metagenome	ERS5184513	ERX4600219	ERR4678595	Illumina	paired	Illumina NovaSeq 6000	Latin America & Caribbean
BRA	DTU_2016_27_3_MG_BRA-53a_2	2016_pil_bra_02	Brazil	BR	Belem	-1.45	-48.47	16	2016-02-15	Global sewage consortium	wastewater	wastewater metagenome	ERS2520885	ERX2624051	ERR2607395	Illumina	paired	Illumina HiSeq 3000	Latin America & Caribbean
BRA	DTU_2017_320_1_MG_BR_BE	2017_jun_bra_01	Brazil	BR	Belem	-1.45	-48.47	17	2017-06-23	Global sewage consortium	wastewater	wastewater metagenome	ERS2597393	ERX2697802	ERR2683188	Illumina	paired	Illumina NovaSeq 6000	Latin America & Caribbean
BRA	DTU_2016_25_1_MG_BRA-53a	2016_pil_bra_02	Brazil	BR	Belem	-1.45	-48.47	16	2016-02-15	Global sewage consortium	wastewater	wastewater metagenome	ERS2520886	ERX2624052	ERR2607396	Illumina	paired	Illumina HiSeq 3000	Latin America & Caribbean
BRA	DTU_2016_247_2_MG_Reproduce_53a_3	2016_pil_bra_04	Brazil	BR	Belem	-1.45	-48.47	16	2016-02-17	Global sewage consortium	wastewater	wastewater metagenome	--	--	--	Illumina	paired	Illumina HiSeq 3000	Latin America & Caribbean
BRA	DTU_2018_776_1_MG_BR_RJ_473	2018_jun_bra_02	Brazil	BR	Rio de Janeiro	-22.91	-43.21	18	2018-09-17	Global sewage consortium	wastewater	wastewater metagenome	ERS5186748	ERX4604340	ERR4682891	Illumina	paired	Illumina NovaSeq 6000	Latin America & Caribbean
BRA	DTU_2018_711_1_MG_BR_BH_408	2018_jun_bra_01	Brazil	BR	Belo Horizonte	-19.92	-43.95	18	2018-07-09	Global sewage consortium	wastewater	wastewater metagenome	ERS5186691	ERX4604283	ERR4682834	Illumina	paired	Illumina NovaSeq 6000	Latin America & Caribbean
BRA	DTU_2018_777_1_MG_BR_BE_474	2018_jun_bra_03	Brazil	BR	Rio de Janeiro	-22.91	-43.21	18	2018	Global sewage consortium	wastewater	wastewater metagenome	ERS5186749	ERX4604341	ERR4682892	Illumina	paired	Illumina NovaSeq 6000	Latin America & Caribbean
BRA	DTU_2018_830_1_MG_BR_BH_514	2018_nov_bra_01	Brazil	BR	Belo Horizonte	-19.92	-43.95	18	2018-12-08	Global sewage consortium	wastewater	wastewater metagenome	ERS5184506	ERX4600212	ERR4678588	Illumina	paired	Illumina NovaSeq 6000	Latin America & Caribbean
BRA	DTU_2016_26_2_MG_BRA-53a_1	2016_pil_bra_02	Brazil	BR	Belem	-1.45	-48.47	16	2016-02-15	Global sewage consortium	wastewater	wastewater metagenome	ERS2520884	ERX2624050	ERR2607394	Illumina	paired	Illumina HiSeq 3000	Latin America & Caribbean
BRA	DTU_2016_24_3_MG_BRA-53_2	2016_pil_bra_01	Brazil	BR	Belem	-1.45	-48.47	16	2016-02-16	Global sewage consortium	wastewater	wastewater metagenome	ERS2520883	ERX2624049	ERR2607393	Illumina	paired	Illumina HiSeq 3000	Latin America & Caribbean
BRA	DTU_2016_246_1_MG_Reproduce_53a_1	2016_pil_bra_03	Brazil	BR	Belem	-1.45	-48.47	16	2016-02-17	Global sewage consortium	wastewater	wastewater metagenome	--	--	--	Illumina	paired	Illumina HiSeq 3000	Latin America & Caribbean
BRA	DTU_2016_22_1_MG_BRA-53	2016_pil_bra_01	Brazil	BR	Belem	-1.45	-48.47	16	2016-02-16	Global sewage consortium	wastewater	wastewater metagenome	ERS2520887	ERX2624053	ERR2607397	Illumina	paired	Illumina HiSeq 3000	Latin America & Caribbean
BRA	DTU_2016_23_2_MG_BRA-53_1	2016_pil_bra_01	Brazil	BR	Belem	-1.45	-48.47	16	2016-02-16	Global sewage consortium	wastewater	wastewater metagenome	ERS2520882	ERX2624048	ERR2607392	Illumina	paired	Illumina HiSeq 3000	Latin America & Caribbean
BWA	DTU_2017_580_1_MG_BW_GA_276	2017_nov_bwa_01	Botswana	BW	Gaborone	-24.66	25.91	17	2017-12-01	Global sewage consortium	wastewater	wastewater metagenome	ERS5186534	ERX4603863	ERR4682411	Illumina	paired	Illumina NovaSeq 6000	Sub-Saharan Africa
BWA	DTU_2016_31_4_MG_BWA-19_3	2016_pil_bwa_01	Botswana	BW	Palapye	-22.54	27.12	16	2016-01-25	Global sewage consortium	wastewater	wastewater metagenome	ERS2520890	ERX2624056	ERR2607400	Illumina	paired	Illumina HiSeq 3000	Sub-Saharan Africa
BWA	DTU_2016_28_1_MG_BWA-19	2016_pil_bwa_01	Botswana	BW	Palapye	-22.54	27.12	16	2016-01-25	Global sewage consortium	wastewater	wastewater metagenome	ERS2520891	ERX2624057	ERR2607401	Illumina	paired	Illumina HiSeq 3000	Sub-Saharan Africa
BWA	DTU_2018_689_1_MG_BW_GA_377	2018_jun_bwa_01	Botswana	BW	Gaborone	-24.66	25.91	18	2018-07-31	Global sewage consortium	wastewater	wastewater metagenome	ERS5186669	ERX4604261	ERR4682812	Illumina	paired	Illumina NovaSeq 6000	Sub-Saharan Africa
BWA	DTU_2016_30_3_MG_BWA-19_2	2016_pil_bwa_01	Botswana	BW	Palapye	-22.54	27.12	16	2016-01-25	Global sewage consortium	wastewater	wastewater metagenome	ERS2520889	ERX2624055	ERR2607399	Illumina	paired	Illumina HiSeq 3000	Sub-Saharan Africa
BWA	DTU_2018_866_1_MG_BW_GA_550	2018_nov_bwa_01	Botswana	BW	Palapye	-22.54	27.12	18	2018-12-07	Global sewage consortium	wastewater	wastewater metagenome	ERS5184539	ERX4600245	ERR4678621	Illumina	paired	Illumina NovaSeq 6000	Sub-Saharan Africa
BWA	DTU_2016_29_2_MG_BWA-19_1	2016_pil_bwa_01	Botswana	BW	Palapye	-22.54	27.12	16	2016-01-25	Global sewage consortium	wastewater	wastewater metagenome	ERS2520888	ERX2624054	ERR2607398	Illumina	paired	Illumina HiSeq 3000	Sub-Saharan Africa
BWA	DTU_2017_396_1_MG_BW_GA	2017_jun_bwa_01	Botswana	BW	Gaborone	-24.66	25.91	17	2017-06-09	Global sewage consortium	wastewater	wastewater metagenome	ERS2597477	ERX2697886	ERR2683272	Illumina	paired	Illumina NovaSeq 6000	Sub-Saharan Africa
CAN	DTU_2016_243_2_MG_Reproduce_22_3	2016_pil_can_06	Canada	CA	Regina	50.45	-104.62	16	2016-01-26	Global sewage consortium	wastewater	wastewater metagenome	--	--	--	Illumina	paired	Illumina HiSeq 3000	North America
CAN	DTU_2016_36_2_MG_CAN-22a_1	2016_pil_can_02	Canada	CA	Calgary	51.05	-114.06	16	2016-01-02	Global sewage consortium	wastewater	wastewater metagenome	ERS2520894	ERX2624060	ERR2607404	Illumina	paired	Illumina HiSeq 3000	North America
CAN	DTU_2016_35_1_MG_CAN-22a	2016_pil_can_02	Canada	CA	Calgary	51.05	-114.06	16	2016-01-02	Global sewage consortium	wastewater	wastewater metagenome	ERS2520898	ERX2624064	ERR2607408	Illumina	paired	Illumina HiSeq 3000	North America
CAN	DTU_2016_45_1_MG_CAN-22c	2016_pil_can_04	Canada	CA	Ottawa	45.42	-75.69	16	2016-01-26	Global sewage consortium	wastewater	wastewater metagenome	ERS2520904	ERX2624070	ERR2607414	Illumina	paired	Illumina HiSeq 3000	North America
CAN	DTU_2018_1023_1_MG_CA1803_L74	2018_lon_can_06	Canada	CA	Regina	50.45	-104.62	18	2018-03-21	Global sewage consortium	wastewater	wastewater metagenome	--	--	--	Illumina	paired	Illumina NovaSeq 6000	North America
CAN	DTU_2016_33_2_MG_CAN-22_1	2016_pil_can_01	Canada	CA	Regina	50.45	-104.62	16	2016-01-26	Global sewage consortium	wastewater	wastewater metagenome	ERS2520892	ERX2624058	ERR2607402	Illumina	paired	Illumina HiSeq 3000	North America
CAN	DTU_2016_34_3_MG_CAN-22_2	2016_pil_can_01	Canada	CA	Regina	50.45	-104.62	16	2016-01-26	Global sewage consortium	wastewater	wastewater metagenome	ERS2520893	ERX2624059	ERR2607403	Illumina	paired	Illumina HiSeq 3000	North America
CAN	DTU_2016_41_2_MG_CAN-22b_1	2016_pil_can_03	Canada	CA	Toronto	43.65	-79.39	16	2016-01-02	Global sewage consortium	wastewater	wastewater metagenome	ERS2520899	ERX2624065	ERR2607409	Illumina	paired	Illumina HiSeq 3000	North America
CAN	DTU_2018_904_1_MG_CA_VA_589	2018_nov_can_03	Canada	CA	Vancouver	49.26	-123.11	18	2018-12-06	Global sewage consortium	wastewater	wastewater metagenome	ERS5184577	ERX4600283	ERR4678659	Illumina	paired	Illumina NovaSeq 6000	North America
CAN	DTU_2016_42_3_MG_CAN-22b_2	2016_pil_can_03	Canada	CA	Toronto	43.65	-79.39	16	2016-01-02	Global sewage consortium	wastewater	wastewater metagenome	ERS2520900	ERX2624066	ERR2607410	Illumina	paired	Illumina HiSeq 3000	North America
CAN	DTU_2017_602_1_MG_CA_OT_298	2017_nov_can_02	Canada	CA	Ottawa	45.42	-75.69	17	2017-11-27	Global sewage consortium	wastewater	wastewater metagenome	ERS5186556	ERX4603885	ERR4682433	Illumina	paired	Illumina NovaSeq 6000	North America
CAN	DTU_2016_44_5_MG_CAN-22b_4	2016_pil_can_03	Canada	CA	Toronto	43.65	-79.39	16	2016-01-02	Global sewage consortium	wastewater	wastewater metagenome	ERS2520902	ERX2624068	ERR2607412	Illumina	paired	Illumina HiSeq 3000	North America
CAN	DTU_2017_440_1_MG_CA_RE	2017_jun_can_01	Canada	CA	Regina	50.45	-104.62	17	2017-06-13	Global sewage consortium	wastewater	wastewater metagenome	ERS2597357	ERX2697766	ERR2683152	Illumina	paired	Illumina NovaSeq 6000	North America
CAN	DTU_2017_441_1_MG_CA_VA	2017_jun_can_02	Canada	CA	Vancouver	49.26	-123.11	17	2017-06-23	Global sewage consortium	wastewater	wastewater metagenome	ERS2597358	ERX2697767	ERR2683153	Illumina	paired	Illumina NovaSeq 6000	North America
CAN	DTU_2016_43_4_MG_CAN-22b_3	2016_pil_can_03	Canada	CA	Toronto	43.65	-79.39	16	2016-01-02	Global sewage consortium	wastewater	wastewater metagenome	ERS2520901	ERX2624067	ERR2607411	Illumina	paired	Illumina HiSeq 3000	North America
CAN	DTU_2016_242_1_MG_Reproduce_22_1	2016_pil_can_05	Canada	CA	Regina	50.45	-104.62	16	2016-01-26	Global sewage consortium	wastewater	wastewater metagenome	--	--	--	Illumina	paired	Illumina HiSeq 3000	North America
CAN	DTU_2018_903_1_MG_CA_RE_588	2018_nov_can_02	Canada	CA	Regina	50.45	-104.62	18	2018-12-19	Global sewage consortium	wastewater	wastewater metagenome	ERS5184576	ERX4600282	ERR4678658	Illumina	paired	Illumina NovaSeq 6000	North America
CAN	DTU_2017_605_1_MG_CA_VA_301	2017_nov_can_05	Canada	CA	Vancouver	49.26	-123.11	17	2017-11-19	Global sewage consortium	wastewater	wastewater metagenome	ERS5186559	ERX4603888	ERR4682436	Illumina	paired	Illumina NovaSeq 6000	North America
CAN	DTU_2018_1024_1_MG_CA1804_L75	2018_lon_can_07	Canada	CA	Regina	50.45	-104.62	18	2018-04-01	Global sewage consortium	wastewater	wastewater metagenome	--	--	--	Illumina	paired	Illumina NovaSeq 6000	North America
CAN	DTU_2018_720_1_MG_CA_OT_417	2018_jun_can_04	Canada	CA	Ottawa	45.42	-75.69	18	2018-07-09	Global sewage consortium	wastewater	wastewater metagenome	ERS5186699	ERX4604291	ERR4682842	Illumina	paired	Illumina NovaSeq 6000	North America
CAN	DTU_2017_993_1_MG_CA1710_L38	2017_lon_can_04	Canada	CA	Regina	50.45	-104.62	17	2017-10-25	Global sewage consortium	wastewater	wastewater metagenome	--	--	--	Illumina	paired	Illumina NovaSeq 6000	North America
CAN	DTU_2018_708_1_MG_CA_RE_396	2018_jun_can_03	Canada	CA	Regina	50.45	-104.62	18	2018-07-10	Global sewage consortium	wastewater	wastewater metagenome	ERS5186688	ERX4604280	ERR4682831	Illumina	paired	Illumina NovaSeq 6000	North America
CAN	DTU_2018_902_1_MG_CA_CA_587	2018_nov_can_01	Canada	CA	Calgary	51.05	-114.06	18	2018-12-10	Global sewage consortium	wastewater	wastewater metagenome	ERS5184575	ERX4600281	ERR4678657	Illumina	paired	Illumina NovaSeq 6000	North America
CAN	DTU_2016_40_1_MG_CAN-22b	2016_pil_can_03	Canada	CA	Toronto	43.65	-79.39	16	2016-01-02	Global sewage consortium	wastewater	wastewater metagenome	ERS2520903	ERX2624069	ERR2607413	Illumina	paired	Illumina HiSeq 3000	North America
CAN	DTU_2017_997_1_MG_CA1712_L42	2017_lon_can_05	Canada	CA	Regina	50.45	-104.62	17	2017-12-19	Global sewage consortium	wastewater	wastewater metagenome	--	--	--	Illumina	paired	Illumina NovaSeq 6000	North America
CAN	DTU_2018_1025_1_MG_CA1805_L76	2018_lon_can_08	Canada	CA	Regina	50.45	-104.62	18	2018-05-29	Global sewage consortium	wastewater	wastewater metagenome	--	--	--	Illumina	paired	Illumina NovaSeq 6000	North America
CAN	DTU_2016_32_1_MG_CAN-22	2016_pil_can_01	Canada	CA	Regina	50.45	-104.62	16	2016-01-26	Global sewage consortium	wastewater	wastewater metagenome	ERS2520905	ERX2624071	ERR2607415	Illumina	paired	Illumina HiSeq 3000	North America
CAN	DTU_2018_1028_1_MG_CA1809_L79	2018_lon_can_11	Canada	CA	Regina	50.45	-104.62	18	2018-09-28	Global sewage consortium	wastewater	wastewater metagenome	--	--	--	Illumina	paired	Illumina NovaSeq 6000	North America
CAN	DTU_2016_38_4_MG_CAN-22a_3	2016_pil_can_02	Canada	CA	Calgary	51.05	-114.06	16	2016-01-02	Global sewage consortium	wastewater	wastewater metagenome	ERS2520896	ERX2624062	ERR2607406	Illumina	paired	Illumina HiSeq 3000	North America
CAN	DTU_2017_446_1_MG_CA_TO	2017_jun_can_05	Canada	CA	Toronto	43.65	-79.39	17	2017-06-14	Global sewage consortium	wastewater	wastewater metagenome	ERS2597364	ERX2697773	ERR2683159	Illumina	paired	Illumina NovaSeq 6000	North America
CAN	DTU_2018_686_1_MG_CA_QE_374	2018_jun_can_01	Canada	CA	Quebec	52.48	-71.83	18	2018-06	Global sewage consortium	wastewater	wastewater metagenome	ERS5186666	ERX4604258	ERR4682809	Illumina	paired	Illumina NovaSeq 6000	North America
CAN	DTU_2018_707_1_MG_CA_CA_395	2018_jun_can_02	Canada	CA	Calgary	51.05	-114.06	18	2018-06-26	Global sewage consortium	wastewater	wastewater metagenome	ERS5186687	ERX4604279	ERR4682830	Illumina	paired	Illumina NovaSeq 6000	North America
CAN	DTU_2017_992_1_MG_CA1709_L37	2017_lon_can_03	Canada	CA	Regina	50.45	-104.62	17	2017-09-27	Global sewage consortium	wastewater	wastewater metagenome	--	--	--	Illumina	paired	Illumina NovaSeq 6000	North America
CAN	DTU_2018_721_1_MG_CA_VA_418	2018_jun_can_05	Canada	CA	Vancouver	49.26	-123.11	18	2018-07-13	Global sewage consortium	wastewater	wastewater metagenome	ERS5186700	ERX4604292	ERR4682843	Illumina	paired	Illumina NovaSeq 6000	North America
CAN	DTU_2017_442_1_MG_CA_CA	2017_jun_can_03	Canada	CA	Calgary	51.05	-114.06	17	2017-06-13	Global sewage consortium	wastewater	wastewater metagenome	ERS2597359	ERX2697768	ERR2683154	Illumina	paired	Illumina NovaSeq 6000	North America
CAN	DTU_2018_1026_1_MG_CA1807_L77	2018_lon_can_09	Canada	CA	Regina	50.45	-104.62	18	2018-07-30	Global sewage consortium	wastewater	wastewater metagenome	--	--	--	Illumina	paired	Illumina NovaSeq 6000	North America
CAN	DTU_2017_603_1_MG_CA_RE_299	2017_nov_can_03	Canada	CA	Regina	50.45	-104.62	17	2017-11-22	Global sewage consortium	wastewater	wastewater metagenome	ERS5186557	ERX4603886	ERR4682434	Illumina	paired	Illumina NovaSeq 6000	North America
CAN	DTU_2016_39_5_MG_CAN-22a_4	2016_pil_can_02	Canada	CA	Calgary	51.05	-114.06	16	2016-01-02	Global sewage consortium	wastewater	wastewater metagenome	ERS2520897	ERX2624063	ERR2607407	Illumina	paired	Illumina HiSeq 3000	North America
CAN	DTU_2016_37_3_MG_CAN-22a_2	2016_pil_can_02	Canada	CA	Calgary	51.05	-114.06	16	2016-01-02	Global sewage consortium	wastewater	wastewater metagenome	ERS2520895	ERX2624061	ERR2607405	Illumina	paired	Illumina HiSeq 3000	North America
CAN	DTU_2017_604_1_MG_CA_CA_300	2017_nov_can_04	Canada	CA	Calgary	51.05	-114.06	17	2017-11-21	Global sewage consortium	wastewater	wastewater metagenome	ERS5186558	ERX4603887	ERR4682435	Illumina	paired	Illumina NovaSeq 6000	North America
CAN	DTU_2017_443_1_MG_CA_OT	2017_jun_can_04	Canada	CA	Ottawa	45.42	-75.69	17	2017-06-14	Global sewage consortium	wastewater	wastewater metagenome	ERS2597360	ERX2697769	ERR2683155	Illumina	paired	Illumina NovaSeq 6000	North America
CAN	DTU_2017_991_1_MG_CA1708_L36	2017_lon_can_02	Canada	CA	Regina	50.45	-104.62	17	2017-08-22	Global sewage consortium	wastewater	wastewater metagenome	--	--	--	Illumina	paired	Illumina NovaSeq 6000	North America
CAN	DTU_2018_905_1_MG_CA_OT_590	2018_nov_can_04	Canada	CA	Ottawa	45.42	-75.69	18	2018-12-06	Global sewage consortium	wastewater	wastewater metagenome	ERS5184578	ERX4600284	ERR4678660	Illumina	paired	Illumina NovaSeq 6000	North America
CAN	DTU_2017_990_1_MG_CA1707_L35	2017_lon_can_01	Canada	CA	Regina	50.45	-104.62	17	2017-07-26	Global sewage consortium	wastewater	wastewater metagenome	--	--	--	Illumina	paired	Illumina NovaSeq 6000	North America
CAN	DTU_2017_556_1_MG_CA_QE_252	2017_nov_can_01	Canada	CA	Quebec	52.48	-71.83	17	2017-12-05	Global sewage consortium	wastewater	wastewater metagenome	ERS5186516	ERX4603845	ERR4682393	Illumina	paired	Illumina NovaSeq 6000	North America
CAN	DTU_2018_1027_1_MG_CA1808_L78	2018_lon_can_10	Canada	CA	Regina	50.45	-104.62	18	2018-08-16	Global sewage consortium	wastewater	wastewater metagenome	--	--	--	Illumina	paired	Illumina NovaSeq 6000	North America
CHE	DTU_2016_47_2_MG_CHE-67_1	2016_pil_che_01	Switzerland	CH	Liebefeld	46.93	7.42	16	2016-01-27	Global sewage consortium	wastewater	wastewater metagenome	ERS2520906	ERX2624072	ERR2607416	Illumina	paired	Illumina HiSeq 3000	Europe & Central Asia
CHE	DTU_2016_46_1_MG_CHE-67	2016_pil_che_01	Switzerland	CH	Liebefeld	46.93	7.42	16	2016-01-27	Global sewage consortium	wastewater	wastewater metagenome	ERS2520912	ERX2624078	ERR2607422	Illumina	paired	Illumina HiSeq 3000	Europe & Central Asia
CHE	DTU_2016_49_4_MG_CHE-67_3	2016_pil_che_01	Switzerland	CH	Liebefeld	46.93	7.42	16	2016-01-27	Global sewage consortium	wastewater	wastewater metagenome	ERS2520908	ERX2624074	ERR2607418	Illumina	paired	Illumina HiSeq 3000	Europe & Central Asia
CHE	DTU_2017_499_1_MG_CH_BR_195	2017_nov_che_01	Switzerland	CH	Bern	46.95	7.45	17	2017-11-21	Global sewage consortium	wastewater	wastewater metagenome	ERS5186463	ERX4603792	ERR4682340	Illumina	paired	Illumina NovaSeq 6000	Europe & Central Asia
CHE	DTU_2016_52_7_MG_CHE-67_6	2016_pil_che_01	Switzerland	CH	Liebefeld	46.93	7.42	16	2016-01-27	Global sewage consortium	wastewater	wastewater metagenome	ERS2520911	ERX2624077	ERR2607421	Illumina	paired	Illumina HiSeq 3000	Europe & Central Asia
CHE	DTU_2018_706_1_MG_CH_BR_394	2018_jun_che_01	Switzerland	CH	Bern	46.95	7.45	18	2018-06-28	Global sewage consortium	wastewater	wastewater metagenome	ERS5186686	ERX4604278	ERR4682829	Illumina	paired	Illumina NovaSeq 6000	Europe & Central Asia
CHE	DTU_2017_347_1_MG_CH_BR	2017_jun_che_01	Switzerland	CH	Bern	46.95	7.45	17	2017-06-11	Global sewage consortium	wastewater	wastewater metagenome	ERS2597423	ERX2697832	ERR2683218	Illumina	paired	Illumina NovaSeq 6000	Europe & Central Asia
CHE	DTU_2018_871_1_MG_CH_BR_555	2018_nov_che_01	Switzerland	CH	Herrenschwanden	46.98	7.42	18	2018-11-22	Global sewage consortium	wastewater	wastewater metagenome	ERS5184544	ERX4600250	ERR4678626	Illumina	paired	Illumina NovaSeq 6000	Europe & Central Asia
CHE	DTU_2016_51_6_MG_CHE-67_5	2016_pil_che_01	Switzerland	CH	Liebefeld	46.93	7.42	16	2016-01-27	Global sewage consortium	wastewater	wastewater metagenome	ERS2520910	ERX2624076	ERR2607420	Illumina	paired	Illumina HiSeq 3000	Europe & Central Asia
CHE	DTU_2016_50_5_MG_CHE-67_4	2016_pil_che_01	Switzerland	CH	Liebefeld	46.93	7.42	16	2016-01-27	Global sewage consortium	wastewater	wastewater metagenome	ERS2520909	ERX2624075	ERR2607419	Illumina	paired	Illumina HiSeq 3000	Europe & Central Asia
CHE	DTU_2016_48_3_MG_CHE-67_2	2016_pil_che_01	Switzerland	CH	Liebefeld	46.93	7.42	16	2016-01-27	Global sewage consortium	wastewater	wastewater metagenome	ERS2520907	ERX2624073	ERR2607417	Illumina	paired	Illumina HiSeq 3000	Europe & Central Asia
CHN	DTU_2017_972_1_MG_CN1710_L15	2017_lon_chn_04	China	CN	Guangzhou	23.13	113.26	17	2017-10-13	Global sewage consortium	wastewater	wastewater metagenome	--	--	--	Illumina	paired	Illumina NovaSeq 6000	East Asia & Pacific
CHN	DTU_2018_1037_1_MG_CN1809_L88	2018_lon_chn_12	China	CN	Guangzhou	23.13	113.26	18	2018-09-01	Global sewage consortium	wastewater	wastewater metagenome	--	--	--	Illumina	paired	Illumina NovaSeq 6000	East Asia & Pacific
CHN	DTU_2018_1036_1_MG_CN1808_L87	2018_lon_chn_11	China	CN	Guangzhou	23.13	113.26	18	2018-08-09	Global sewage consortium	wastewater	wastewater metagenome	--	--	--	Illumina	paired	Illumina NovaSeq 6000	East Asia & Pacific
CHN	DTU_2018_705_1_MG_CN_YA_393	2018_jun_chn_02	China	CN	Yangzhou	32.39	119.44	18	2018-06-22	Global sewage consortium	wastewater	wastewater metagenome	ERS5186685	ERX4604277	ERR4682828	Illumina	paired	Illumina NovaSeq 6000	East Asia & Pacific
CHN	DTU_2016_250_1_MG_Reproduce_64_1	2016_pil_chn_02	China	CN	Guangzhou	23.13	113.26	16	2016-02-02	Global sewage consortium	wastewater	wastewater metagenome	--	--	--	Illumina	paired	Illumina HiSeq 3000	East Asia & Pacific
CHN	DTU_2016_53_1_MG_CHN-64	2016_pil_chn_01	China	CN	Guangzhou	23.13	113.26	16	2016-01-28	Global sewage consortium	wastewater	wastewater metagenome	ERS2520913	ERX2624079	ERR2607423	Illumina	paired	Illumina HiSeq 3000	East Asia & Pacific
CHN	DTU_2018_783_1_MG_CN_GU_480	2018_jun_chn_03	China	CN	Guangzhou	23.13	113.26	18	2018-06-05	Global sewage consortium	wastewater	wastewater metagenome	ERS5186755	ERX4604347	ERR4682898	Illumina	paired	Illumina NovaSeq 6000	East Asia & Pacific
CHN	DTU_2018_864_1_MG_CN_NA_548	2018_nov_chn_01	China	CN	Nanjing	32.06	118.79	18	2018-12-27	Global sewage consortium	wastewater	wastewater metagenome	ERS5184537	ERX4600243	ERR4678619	Illumina	paired	Illumina NovaSeq 6000	East Asia & Pacific
CHN	DTU_2018_1004_1_MG_CN1803_L49	2018_lon_chn_08	China	CN	Guangzhou	23.13	113.26	18	2018-03-18	Global sewage consortium	wastewater	wastewater metagenome	--	--	--	Illumina	paired	Illumina NovaSeq 6000	East Asia & Pacific
CHN	DTU_2017_969_1_MG_CN1707_L12	2017_lon_chn_01	China	CN	Guangzhou	23.13	113.26	17	2017-07-11	Global sewage consortium	wastewater	wastewater metagenome	--	--	--	Illumina	paired	Illumina NovaSeq 6000	East Asia & Pacific
CHN	DTU_2017_971_1_MG_CN1709_L14	2017_lon_chn_03	China	CN	Guangzhou	23.13	113.26	17	2017-09-30	Global sewage consortium	wastewater	wastewater metagenome	--	--	--	Illumina	paired	Illumina NovaSeq 6000	East Asia & Pacific
CHN	DTU_2018_1034_1_MG_CN1804_L85	2018_lon_chn_09	China	CN	Guangzhou	23.13	113.26	18	2018-04-10	Global sewage consortium	wastewater	wastewater metagenome	--	--	--	Illumina	paired	Illumina NovaSeq 6000	East Asia & Pacific
CHN	DTU_2017_634_1_MG_CN_GU_330	2017_nov_chn_01	China	CN	Guangzhou	23.13	113.26	17	2017-12-21	Global sewage consortium	wastewater	wastewater metagenome	ERS5186588	ERX4603917	ERR4682465	Illumina	paired	Illumina NovaSeq 6000	East Asia & Pacific
CHN	DTU_2018_1003_1_MG_CN1802_L48	2018_lon_chn_07	China	CN	Guangzhou	23.13	113.26	18	2018-02-08	Global sewage consortium	wastewater	wastewater metagenome	--	--	--	Illumina	paired	Illumina NovaSeq 6000	East Asia & Pacific
CHN	DTU_2018_868_1_MG_CH_SU_552	2018_nov_chn_02	China	CN	Suzhou	31.3	120.58	18	2018-12-27	Global sewage consortium	wastewater	wastewater metagenome	ERS5184541	ERX4600247	ERR4678623	Illumina	paired	Illumina NovaSeq 6000	East Asia & Pacific
CHN	DTU_2017_970_1_MG_CN1708_L13	2017_lon_chn_02	China	CN	Guangzhou	23.13	113.26	17	2017-08-23	Global sewage consortium	wastewater	wastewater metagenome	--	--	--	Illumina	paired	Illumina NovaSeq 6000	East Asia & Pacific
CHN	DTU_2016_251_2_MG_Reproduce_64_3	2016_pil_chn_03	China	CN	Guangzhou	23.13	113.26	16	2016-02-02	Global sewage consortium	wastewater	wastewater metagenome	--	--	--	Illumina	paired	Illumina HiSeq 3000	East Asia & Pacific
CHN	DTU_2017_487_1_MG_CN_GU_183	2017_jun_chn_01	China	CN	Guangzhou	23.13	113.26	17	2017-06-16	Global sewage consortium	wastewater	wastewater metagenome	--	--	--	Illumina	paired	Illumina NovaSeq 6000	East Asia & Pacific
CHN	DTU_2017_1001_1_MG_CN1712_L46	2017_lon_chn_05	China	CN	Guangzhou	23.13	113.26	17	2017-12-21	Global sewage consortium	wastewater	wastewater metagenome	--	--	--	Illumina	paired	Illumina NovaSeq 6000	East Asia & Pacific
CHN	DTU_2018_1035_1_MG_CN1805_L86	2018_lon_chn_10	China	CN	Guangzhou	23.13	113.26	18	2018-05-11	Global sewage consortium	wastewater	wastewater metagenome	--	--	--	Illumina	paired	Illumina NovaSeq 6000	East Asia & Pacific
CHN	DTU_2018_704_1_MG_CN_NA_392	2018_jun_chn_01	China	CN	Nanjing	32.06	118.79	18	2018-06-21	Global sewage consortium	wastewater	wastewater metagenome	ERS5186684	ERX4604276	ERR4682827	Illumina	paired	Illumina NovaSeq 6000	East Asia & Pacific
CHN	DTU_2018_1002_1_MG_CN1801_L47	2018_lon_chn_06	China	CN	Guangzhou	23.13	113.26	18	2018-01-10	Global sewage consortium	wastewater	wastewater metagenome	--	--	--	Illumina	paired	Illumina NovaSeq 6000	East Asia & Pacific
CHN	DTU_2018_1038_1_MG_CN1810_L89	2018_lon_chn_13	China	CN	Guangzhou	23.13	113.26	18	2018-10-09	Global sewage consortium	wastewater	wastewater metagenome	--	--	--	Illumina	paired	Illumina NovaSeq 6000	East Asia & Pacific
CIV	DTU_2016_56_3_MG_CIV-13_2	2016_pil_civ_01	Cote d'Ivoire	CI	Abidjan	5.32	-4.02	16	2016-01-25	Global sewage consortium	wastewater	wastewater metagenome	ERS2520915	ERX2624081	ERR2607425	Illumina	paired	Illumina HiSeq 3000	Sub-Saharan Africa
CIV	DTU_2016_55_2_MG_CIV-13_1	2016_pil_civ_01	Cote d'Ivoire	CI	Abidjan	5.32	-4.02	16	2016-01-25	Global sewage consortium	wastewater	wastewater metagenome	ERS2520914	ERX2624080	ERR2607424	Illumina	paired	Illumina HiSeq 3000	Sub-Saharan Africa
CIV	DTU_2018_844_1_MG_CI_BO_528	2018_nov_civ_01	Cote d'Ivoire	CI	Bouake	7.69	-5.03	18	2018-12-17	Global sewage consortium	wastewater	wastewater metagenome	ERS5184517	ERX4600223	ERR4678599	Illumina	paired	Illumina NovaSeq 6000	Sub-Saharan Africa
CIV	DTU_2018_718_1_MG_CI_YA_415	2018_jun_civ_02	Cote d'Ivoire	CI	Yamoussoukro	6.81	-5.27	18	2018-07-07	Global sewage consortium	wastewater	wastewater metagenome	ERS5186697	ERX4604289	ERR4682840	Illumina	paired	Illumina NovaSeq 6000	Sub-Saharan Africa
CIV	DTU_2018_719_1_MG_CI_BO_416	2018_jun_civ_03	Cote d'Ivoire	CI	Bouake	7.69	-5.03	18	2018-07-06	Global sewage consortium	wastewater	wastewater metagenome	ERS5186698	ERX4604290	ERR4682841	Illumina	paired	Illumina NovaSeq 6000	Sub-Saharan Africa
CIV	DTU_2017_312_1_MG_CI_AB	2017_jun_civ_01	Cote d'Ivoire	CI	Abidjan	5.32	-4.02	17	2017-06-13	Global sewage consortium	wastewater	wastewater metagenome	ERS2597474	ERX2697883	ERR2683269	Illumina	paired	Illumina NovaSeq 6000	Sub-Saharan Africa
CIV	DTU_2017_314_1_MG_CI_YA	2017_jun_civ_03	Cote d'Ivoire	CI	Yamoussoukro	6.81	-5.27	17	2017-06-12	Global sewage consortium	wastewater	wastewater metagenome	ERS2597328	ERX2697737	ERR2683123	Illumina	paired	Illumina NovaSeq 6000	Sub-Saharan Africa
CIV	DTU_2016_54_1_MG_CIV-13	2016_pil_civ_01	Cote d'Ivoire	CI	Abidjan	5.32	-4.02	16	2016-01-25	Global sewage consortium	wastewater	wastewater metagenome	ERS2520916	ERX2624082	ERR2607426	Illumina	paired	Illumina HiSeq 3000	Sub-Saharan Africa
CIV	DTU_2017_524_1_MG_CI_YA_220	2017_nov_civ_03	Cote d'Ivoire	CI	Yamoussoukro	6.81	-5.27	17	2017-11-22	Global sewage consortium	wastewater	wastewater metagenome	ERS5186484	ERX4603813	ERR4682361	Illumina	paired	Illumina NovaSeq 6000	Sub-Saharan Africa
CIV	DTU_2017_395_2_MG_CI_BO_b	2017_jun_civ_04	Cote d'Ivoire	CI	Bwake	7.71	-5.02	17	2017-06-12	Global sewage consortium	wastewater	wastewater metagenome	ERS2597476	ERX2697885	ERR2683271	Illumina	paired	Illumina NovaSeq 6000	Sub-Saharan Africa
CIV	DTU_2018_949_1_MG_CI_BO_2_630	2018_nov_civ_02	Cote d'Ivoire	CI	Bouake	7.69	-5.03	18	2018-12-17	Global sewage consortium	wastewater	wastewater metagenome	ERS5184616	ERX4600322	ERR4678698	Illumina	paired	Illumina NovaSeq 6000	Sub-Saharan Africa
CIV	DTU_2017_523_1_MG_CI_BO_219	2017_nov_civ_02	Cote d'Ivoire	CI	Bouake	7.69	-5.03	17	2017-11-21	Global sewage consortium	wastewater	wastewater metagenome	ERS5186483	ERX4603812	ERR4682360	Illumina	paired	Illumina NovaSeq 6000	Sub-Saharan Africa
CIV	DTU_2018_735_1_MG_CI_YA_2_432	2018_jun_civ_04	Cote d'Ivoire	CI	Yamoussoukro	6.81	-5.27	18	2018-07-07	Global sewage consortium	wastewater	wastewater metagenome	ERS5186714	ERX4604306	ERR4682857	Illumina	paired	Illumina NovaSeq 6000	Sub-Saharan Africa
CIV	DTU_2018_736_1_MG_CI_BO_2_433	2018_jun_civ_05	Cote d'Ivoire	CI	Bouake	7.69	-5.03	18	2018-07-06	Global sewage consortium	wastewater	wastewater metagenome	ERS5186715	ERX4604307	ERR4682858	Illumina	paired	Illumina NovaSeq 6000	Sub-Saharan Africa
CIV	DTU_2017_313_1_MG_CI_BO_a	2017_jun_civ_02	Cote d'Ivoire	CI	Bwake	7.71	-5.02	17	2017-06-12	Global sewage consortium	wastewater	wastewater metagenome	ERS2597485	ERX2697894	ERR2683280	Illumina	paired	Illumina NovaSeq 6000	Sub-Saharan Africa
CIV	DTU_2018_717_1_MG_CI_AB_414	2018_jun_civ_01	Cote d'Ivoire	CI	Abidjan	5.32	-4.02	18	2018-07-07	Global sewage consortium	wastewater	wastewater metagenome	ERS5186696	ERX4604288	ERR4682839	Illumina	paired	Illumina NovaSeq 6000	Sub-Saharan Africa
CIV	DTU_2017_522_1_MG_CI_AB_218	2017_nov_civ_01	Cote d'Ivoire	CI	Abidjan	5.32	-4.02	17	2017-11-22	Global sewage consortium	wastewater	wastewater metagenome	ERS5186482	ERX4603811	ERR4682359	Illumina	paired	Illumina NovaSeq 6000	Sub-Saharan Africa
CZE	DTU_2017_509_1_MG_CZ_PR_205	2017_nov_cze_01	Czech Republic	CZ	Praha	50.09	14.42	17	2017-11-20	Global sewage consortium	wastewater	wastewater metagenome	ERS5186473	ERX4603802	ERR4682350	Illumina	paired	Illumina NovaSeq 6000	Europe & Central Asia
CZE	DTU_2018_658_1_MG_CZ_PR_346	2018_jun_cze_01	Czech Republic	CZ	Praha	50.09	14.42	18	2018-06-20	Global sewage consortium	wastewater	wastewater metagenome	ERS5186641	ERX4604233	ERR4682784	Illumina	paired	Illumina NovaSeq 6000	Europe & Central Asia
CZE	DTU_2018_659_1_MG_CZ_BR_347	2018_jun_cze_02	Czech Republic	CZ	Brno	49.19	16.61	18	2018-06-20	Global sewage consortium	wastewater	wastewater metagenome	ERS5186642	ERX4604234	ERR4682785	Illumina	paired	Illumina NovaSeq 6000	Europe & Central Asia
CZE	DTU_2017_362_1_MG_CZ_PR	2017_jun_cze_01	Czech Republic	CZ	Praha	50.09	14.42	17	2017-06-13	Global sewage consortium	wastewater	wastewater metagenome	ERS2597439	ERX2697848	ERR2683234	Illumina	paired	Illumina NovaSeq 6000	Europe & Central Asia
CZE	DTU_2018_819_1_MG_CZ_PR_503	2018_nov_cze_01	Czech Republic	CZ	Praha	50.09	14.42	18	2018-12-04	Global sewage consortium	wastewater	wastewater metagenome	ERS5184495	ERX4600201	ERR4678577	Illumina	paired	Illumina NovaSeq 6000	Europe & Central Asia
CZE	DTU_2017_363_1_MG_CZ_BR	2017_jun_cze_02	Czech Republic	CZ	Brno	49.19	16.61	17	2017-06-13	Global sewage consortium	wastewater	wastewater metagenome	ERS2597440	ERX2697849	ERR2683235	Illumina	paired	Illumina NovaSeq 6000	Europe & Central Asia
CZE	DTU_2018_820_1_MG_CZ_BR_504	2018_nov_cze_02	Czech Republic	CZ	Brno	49.19	16.61	18	2018-12-05	Global sewage consortium	wastewater	wastewater metagenome	ERS5184496	ERX4600202	ERR4678578	Illumina	paired	Illumina NovaSeq 6000	Europe & Central Asia
CZE	DTU_2016_59_2_MG_CZE-23_1	2016_pil_cze_01	Czech Republic	CZ	Brno	49.19	16.61	16	2016-01-02	Global sewage consortium	wastewater	wastewater metagenome	ERS2520918	ERX2624084	ERR2607428	Illumina	paired	Illumina HiSeq 3000	Europe & Central Asia
CZE	DTU_2016_58_1_MG_CZE-23	2016_pil_cze_01	Czech Republic	CZ	Brno	49.19	16.61	16	2016-01-02	Global sewage consortium	wastewater	wastewater metagenome	ERS2520920	ERX2624086	ERR2607430	Illumina	paired	Illumina HiSeq 3000	Europe & Central Asia
CZE	DTU_2017_510_1_MG_CZ_BR_206	2017_nov_cze_02	Czech Republic	CZ	Brno	49.19	16.61	17	2017-11-22	Global sewage consortium	wastewater	wastewater metagenome	ERS5186474	ERX4603803	ERR4682351	Illumina	paired	Illumina NovaSeq 6000	Europe & Central Asia
CZE	DTU_2016_60_3_MG_CZE-23_2	2016_pil_cze_01	Czech Republic	CZ	Brno	49.19	16.61	16	2016-01-02	Global sewage consortium	wastewater	wastewater metagenome	ERS2520919	ERX2624085	ERR2607429	Illumina	paired	Illumina HiSeq 3000	Europe & Central Asia
DEU	DTU_2018_763_1_MG_DE_BE_460	2018_jun_deu_02	Germany	DE	Berlin	52.52	13.39	18	2018-07-04	Global sewage consortium	wastewater	wastewater metagenome	ERS5186739	ERX4604331	ERR4682882	Illumina	paired	Illumina NovaSeq 6000	Europe & Central Asia
DEU	DTU_2018_880_1_MG_DE_BE_565	2018_nov_deu_02	Germany	DE	Berlin	52.52	13.39	18	2018-12-13	Global sewage consortium	wastewater	wastewater metagenome	ERS5184553	ERX4600259	ERR4678635	Illumina	paired	Illumina NovaSeq 6000	Europe & Central Asia
DEU	DTU_2016_244_1_MG_Reproduce_27_1	2016_pil_deu_02	Germany	DE	Berlin	52.52	13.39	16	2016-02-09	Global sewage consortium	wastewater	wastewater metagenome	--	--	--	Illumina	paired	Illumina HiSeq 3000	Europe & Central Asia
DEU	DTU_2017_538_1_MG_DE_BE_234	2017_nov_deu_01	Germany	DE	Berlin	52.52	13.39	17	2017-11-28	Global sewage consortium	wastewater	wastewater metagenome	ERS5186498	ERX4603827	ERR4682375	Illumina	paired	Illumina NovaSeq 6000	Europe & Central Asia
DEU	DTU_2017_379_1_MG_DE_BE	2017_jun_deu_02	Germany	DE	Berlin	52.52	13.39	17	2017-06-14	Global sewage consortium	wastewater	wastewater metagenome	ERS2597458	ERX2697867	ERR2683253	Illumina	paired	Illumina NovaSeq 6000	Europe & Central Asia
DEU	DTU_2016_245_2_MG_Reproduce_27_3	2016_pil_deu_03	Germany	DE	Berlin	52.52	13.39	16	2016-02-09	Global sewage consortium	wastewater	wastewater metagenome	--	--	--	Illumina	paired	Illumina HiSeq 3000	Europe & Central Asia
DEU	DTU_2016_65_5_MG_DEU-27_4	2016_pil_deu_01	Germany	DE	Berlin	52.52	13.39	16	2016-08-02	Global sewage consortium	wastewater	wastewater metagenome	ERS2520924	ERX2624090	ERR2607434	Illumina	paired	Illumina HiSeq 3000	Europe & Central Asia
DEU	DTU_2018_660_1_MG_DE_DR_348	2018_jun_deu_01	Germany	DE	Dresden	51.05	13.74	18	2018-06-21	Global sewage consortium	wastewater	wastewater metagenome	ERS5186643	ERX4604235	ERR4682786	Illumina	paired	Illumina NovaSeq 6000	Europe & Central Asia
DEU	DTU_2018_818_1_MG_DE_DR_502	2018_nov_deu_01	Germany	DE	Dresden	51.05	13.74	18	2018-12-05	Global sewage consortium	wastewater	wastewater metagenome	ERS5184494	ERX4600200	ERR4678576	Illumina	paired	Illumina NovaSeq 6000	Europe & Central Asia
DEU	DTU_2016_62_2_MG_DEU-27_1	2016_pil_deu_01	Germany	DE	Berlin	52.52	13.39	16	2016-08-02	Global sewage consortium	wastewater	wastewater metagenome	ERS2520921	ERX2624087	ERR2607431	Illumina	paired	Illumina HiSeq 3000	Europe & Central Asia
DEU	DTU_2017_540_1_MG_DE_DR_236	2017_nov_deu_02	Germany	DE	Dresden	51.05	13.74	17	2017-11-29	Global sewage consortium	wastewater	wastewater metagenome	ERS5186500	ERX4603829	ERR4682377	Illumina	paired	Illumina NovaSeq 6000	Europe & Central Asia
DEU	DTU_2016_61_1_MG_DEU-27	2016_pil_deu_01	Germany	DE	Berlin	52.52	13.39	16	2016-08-02	Global sewage consortium	wastewater	wastewater metagenome	ERS2520925	ERX2624091	ERR2607435	Illumina	paired	Illumina HiSeq 3000	Europe & Central Asia
DEU	DTU_2017_339_1_MG_DE_DR	2017_jun_deu_01	Germany	DE	Dresden	51.05	13.74	17	2017-07-09	Global sewage consortium	wastewater	wastewater metagenome	ERS2597414	ERX2697823	ERR2683209	Illumina	paired	Illumina NovaSeq 6000	Europe & Central Asia
DEU	DTU_2016_64_4_MG_DEU-27_3	2016_pil_deu_01	Germany	DE	Berlin	52.52	13.39	16	2016-08-02	Global sewage consortium	wastewater	wastewater metagenome	ERS2520923	ERX2624089	ERR2607433	Illumina	paired	Illumina HiSeq 3000	Europe & Central Asia
DNK	DTU_2018_916_1_MG_DK_AV_601	2018_nov_dnk_01	Denmark	DK	Avedore	55.63	12.46	18	2018-11-18	Global sewage consortium	wastewater	wastewater metagenome	ERS5184589	ERX4600295	ERR4678671	Illumina	paired	Illumina NovaSeq 6000	Europe & Central Asia
DNK	DTU_2018_918_1_MG_DK_AM_603	2018_nov_dnk_03	Denmark	DK	Amager	55.62	12.6	18	2018-11-18	Global sewage consortium	wastewater	wastewater metagenome	ERS5184591	ERX4600297	ERR4678673	Illumina	paired	Illumina NovaSeq 6000	Europe & Central Asia
DNK	DTU_2018_647_1_MG_DK_AV_335	2018_jun_dnk_01	Denmark	DK	Avedore	55.63	12.46	18	2018-06-11	Global sewage consortium	wastewater	wastewater metagenome	ERS5186630	ERX4604222	ERR4682773	Illumina	paired	Illumina NovaSeq 6000	Europe & Central Asia
DNK	DTU_2018_917_1_MG_DK_VA_602	2018_nov_dnk_02	Denmark	DK	Valby	55.66	12.52	18	2018-11-18	Global sewage consortium	wastewater	wastewater metagenome	ERS5184590	ERX4600296	ERR4678672	Illumina	paired	Illumina NovaSeq 6000	Europe & Central Asia
DNK	DTU_2018_649_1_MG_DK_AM_337	2018_jun_dnk_03	Denmark	DK	Amager	55.62	12.6	18	2018-06-11	Global sewage consortium	wastewater	wastewater metagenome	ERS5186632	ERX4604224	ERR4682775	Illumina	paired	Illumina NovaSeq 6000	Europe & Central Asia
DNK	DTU_2018_919_2_MG_DK_AM_603_re_1	2018_nov_dnk_03	Denmark	DK	Amager	55.62	12.6	18	2018-11-18	Global sewage consortium	wastewater	wastewater metagenome	ERS5184592	ERX4600298	ERR4678674	Illumina	paired	Illumina NovaSeq 6000	Europe & Central Asia
DNK	DTU_2018_648_1_MG_DK_VA_336	2018_jun_dnk_02	Denmark	DK	Valby	55.66	12.52	18	2018-06-11	Global sewage consortium	wastewater	wastewater metagenome	ERS5186631	ERX4604223	ERR4682774	Illumina	paired	Illumina NovaSeq 6000	Europe & Central Asia
DNK	DTU_2016_66_1_MG_DNK_71_RL	2016_pil_dnk_01	Denmark	DK	Lynetten	55.7	12.62	16	2016-02-03	Global sewage consortium	wastewater	wastewater metagenome	ERS2520928	ERX2624094	ERR2607438	Illumina	paired	Illumina HiSeq 3000	Europe & Central Asia
DNK	DTU_2016_67_1_MG_DNK-71_RA	2016_pil_dnk_02	Denmark	DK	Avedore	55.63	12.46	16	2016-02-03	Global sewage consortium	wastewater	wastewater metagenome	ERS2520926	ERX2624092	ERR2607436	Illumina	paired	Illumina HiSeq 3000	Europe & Central Asia
DNK	DTU_2017_328_1_MG_DK_AV	2017_jun_dnk_01	Denmark	DK	Avedore	55.63	12.46	17	2017-06-15	Global sewage consortium	wastewater	wastewater metagenome	ERS2597402	ERX2697811	ERR2683197	Illumina	paired	Illumina NovaSeq 6000	Europe & Central Asia
DNK	DTU_2017_322_1_MG_GL_SI	2017_jun_grl_01	Greenland	DK	Sisimiut	66.93	-53.67	17	2017-06-16	Global sewage consortium	wastewater	wastewater metagenome	ERS2597395	ERX2697804	ERR2683190	Illumina	paired	Illumina NovaSeq 6000	Europe & Central Asia
DNK	DTU_2016_68_1_MG_DNK-71_RD	2016_pil_dnk_03	Denmark	DK	Damhusaaen	55.64	12.5	16	2016-02-03	Global sewage consortium	wastewater	wastewater metagenome	ERS2520927	ERX2624093	ERR2607437	Illumina	paired	Illumina HiSeq 3000	Europe & Central Asia
DNK	DTU_2017_631_1_MG_DK_VA_327	2017_nov_dnk_01	Denmark	DK	Valby	55.66	12.52	17	2017-11-18	Global sewage consortium	wastewater	wastewater metagenome	ERS5186585	ERX4603914	ERR4682462	Illumina	paired	Illumina NovaSeq 6000	Europe & Central Asia
DNK	DTU_2017_632_1_MG_DK_MA_328	2017_nov_dnk_02	Denmark	DK	Amager	55.62	12.6	17	2017-11-18	Global sewage consortium	wastewater	wastewater metagenome	ERS5186586	ERX4603915	ERR4682463	Illumina	paired	Illumina NovaSeq 6000	Europe & Central Asia
DNK	DTU_2017_633_1_MG_DK_AV_329	2017_nov_dnk_03	Denmark	DK	Avedore	55.63	12.46	17	2017-11-18	Global sewage consortium	wastewater	wastewater metagenome	ERS5186587	ERX4603916	ERR4682464	Illumina	paired	Illumina NovaSeq 6000	Europe & Central Asia
ECU	DTU_2018_1029_1_MG_EC1803_L80	2018_lon_ecu_04	Ecuador	EC	Quito	-0.22	-78.51	18	2018-03-29	Global sewage consortium	wastewater	wastewater metagenome	--	--	--	Illumina	paired	Illumina NovaSeq 6000	Latin America & Caribbean
ECU	DTU_2017_400_1_MG_EC_QU	2017_jun_ecu_01	Ecuador	EC	Quito	-0.22	-78.51	17	2017-12-14	Global sewage consortium	wastewater	wastewater metagenome	ERS2597481	ERX2697890	ERR2683276	Illumina	paired	Illumina NovaSeq 6000	Latin America & Caribbean
ECU	DTU_2016_69_1_MG_ECU-14	2016_pil_ecu_01	Ecuador	EC	Quito	-0.22	-78.51	16	2016-01-02	Global sewage consortium	wastewater	wastewater metagenome	ERS2520931	ERX2624097	ERR2607441	Illumina	paired	Illumina HiSeq 3000	Latin America & Caribbean
ECU	DTU_2016_70_1_MG_ECU-14a	2016_pil_ecu_02	Ecuador	EC	Galapagos	-0.63	-90.36	16	2016-06-02	Global sewage consortium	wastewater	wastewater metagenome	ERS2520930	ERX2624096	ERR2607440	Illumina	paired	Illumina HiSeq 3000	Latin America & Caribbean
ECU	DTU_2017_403_1_MG_EC_CU	2017_jun_ecu_03	Ecuador	EC	Cuenca	-2.9	-79	17	2017-06-09	Global sewage consortium	wastewater	wastewater metagenome	ERS2597484	ERX2697893	ERR2683279	Illumina	paired	Illumina NovaSeq 6000	Latin America & Caribbean
ECU	DTU_2017_404_1_MG_EC_GA	2017_jun_ecu_04	Ecuador	EC	Galapagos	-0.63	-90.36	17	2017-06-27	Global sewage consortium	wastewater	wastewater metagenome	ERS2597319	ERX2697728	ERR2683114	Illumina	paired	Illumina NovaSeq 6000	Latin America & Caribbean
ECU	DTU_2018_1030_1_MG_EC1804_L81	2018_lon_ecu_05	Ecuador	EC	Quito	-0.22	-78.51	18	2018-04-26	Global sewage consortium	wastewater	wastewater metagenome	--	--	--	Illumina	paired	Illumina NovaSeq 6000	Latin America & Caribbean
ECU	DTU_2018_995_1_MG_EC1801_L40	2018_lon_ecu_02	Ecuador	EC	Quito	-0.22	-78.51	18	2018-01-31	Global sewage consortium	wastewater	wastewater metagenome	--	--	--	Illumina	paired	Illumina NovaSeq 6000	Latin America & Caribbean
ECU	DTU_2017_627_1_MG_EC_QU_323	2017_nov_ecu_01	Ecuador	EC	Quito	-0.22	-78.51	17	2017-11-23	Global sewage consortium	wastewater	wastewater metagenome	ERS5186581	ERX4603910	ERR4682458	Illumina	paired	Illumina NovaSeq 6000	Latin America & Caribbean
ECU	DTU_2016_71_2_MG_ECU-14a_1	2016_pil_ecu_02	Ecuador	EC	Galapagos	-0.63	-90.36	16	2016-06-02	Global sewage consortium	wastewater	wastewater metagenome	ERS2520929	ERX2624095	ERR2607439	Illumina	paired	Illumina HiSeq 3000	Latin America & Caribbean
ECU	DTU_2018_1031_1_MG_EC1805_L82	2018_lon_ecu_06	Ecuador	EC	Quito	-0.22	-78.51	18	2018-05-25	Global sewage consortium	wastewater	wastewater metagenome	--	--	--	Illumina	paired	Illumina NovaSeq 6000	Latin America & Caribbean
ECU	DTU_2018_1033_1_MG_EC1808_L84	2018_lon_ecu_08	Ecuador	EC	Quito	-0.22	-78.51	18	2018-08-29	Global sewage consortium	wastewater	wastewater metagenome	--	--	--	Illumina	paired	Illumina NovaSeq 6000	Latin America & Caribbean
ECU	DTU_2018_1032_1_MG_EC1807_L83	2018_lon_ecu_07	Ecuador	EC	Quito	-0.22	-78.51	18	2018-07-26	Global sewage consortium	wastewater	wastewater metagenome	--	--	--	Illumina	paired	Illumina NovaSeq 6000	Latin America & Caribbean
ECU	DTU_2018_716_1_MG_EC_QU_413	2018_jun_ecu_01	Ecuador	EC	Quito	-0.22	-78.51	18	2018-06-28	Global sewage consortium	wastewater	wastewater metagenome	ERS5186695	ERX4604287	ERR4682838	Illumina	paired	Illumina NovaSeq 6000	Latin America & Caribbean
ECU	DTU_2018_996_1_MG_EC1802_L41	2018_lon_ecu_03	Ecuador	EC	Quito	-0.22	-78.51	18	2018-02-28	Global sewage consortium	wastewater	wastewater metagenome	--	--	--	Illumina	paired	Illumina NovaSeq 6000	Latin America & Caribbean
ECU	DTU_2017_994_1_MG_EC1712_L39	2017_lon_ecu_01	Ecuador	EC	Quito	-0.22	-78.51	17	2017-12-23	Global sewage consortium	wastewater	wastewater metagenome	--	--	--	Illumina	paired	Illumina NovaSeq 6000	Latin America & Caribbean
ECU	DTU_2017_402_1_MG_EC_GY	2017_jun_ecu_02	Ecuador	EC	Guayaquil	-2.19	-79.89	17	2017-06-14	Global sewage consortium	wastewater	wastewater metagenome	ERS2597483	ERX2697892	ERR2683278	Illumina	paired	Illumina NovaSeq 6000	Latin America & Caribbean
ESP	DTU_2016_72_1_MG_ESP-75	2016_pil_esp_01	Spain	ES	Barcelona	41.38	2.18	16	2016-10-02	Global sewage consortium	wastewater	wastewater metagenome	ERS2520937	ERX2624103	ERR2607447	Illumina	paired	Illumina HiSeq 3000	Europe & Central Asia
ESP	DTU_2018_894_1_MG_ES_SA_581	2018_nov_esp_03	Spain	ES	Santiago	42.84	-8.5	18	2019-01-08	Global sewage consortium	wastewater	wastewater metagenome	ERS5184567	ERX4600273	ERR4678649	Illumina	paired	Illumina NovaSeq 6000	Europe & Central Asia
ESP	DTU_2016_77_6_MG_ESP-75_5	2016_pil_esp_01	Spain	ES	Barcelona	41.38	2.18	16	2016-10-02	Global sewage consortium	wastewater	wastewater metagenome	ERS2520936	ERX2624102	ERR2607446	Illumina	paired	Illumina HiSeq 3000	Europe & Central Asia
ESP	DTU_2016_74_3_MG_ESP-75_2	2016_pil_esp_01	Spain	ES	Barcelona	41.38	2.18	16	2016-10-02	Global sewage consortium	wastewater	wastewater metagenome	ERS2520933	ERX2624099	ERR2607443	Illumina	paired	Illumina HiSeq 3000	Europe & Central Asia
ESP	DTU_2017_307_1_MG_ES_BA	2017_jun_esp_01	Spain	ES	Barcelona	41.38	2.18	17	2017-06-08	Global sewage consortium	wastewater	wastewater metagenome	ERS2597419	ERX2697828	ERR2683214	Illumina	paired	Illumina NovaSeq 6000	Europe & Central Asia
ESP	DTU_2016_76_5_MG_ESP-75_4	2016_pil_esp_01	Spain	ES	Barcelona	41.38	2.18	16	2016-10-02	Global sewage consortium	wastewater	wastewater metagenome	ERS2520935	ERX2624101	ERR2607445	Illumina	paired	Illumina HiSeq 3000	Europe & Central Asia
ESP	DTU_2018_816_1_MG_ES_IL_500	2018_nov_esp_02	Spain	ES	Lleida	41.61	0.63	18	2018-12-03	Global sewage consortium	wastewater	wastewater metagenome	ERS5184492	ERX4600198	ERR4678574	Illumina	paired	Illumina NovaSeq 6000	Europe & Central Asia
ESP	DTU_2016_73_2_MG_ESP-75_1	2016_pil_esp_01	Spain	ES	Barcelona	41.38	2.18	16	2016-10-02	Global sewage consortium	wastewater	wastewater metagenome	ERS2520932	ERX2624098	ERR2607442	Illumina	paired	Illumina HiSeq 3000	Europe & Central Asia
ESP	DTU_2018_815_1_MG_ES_BA_499	2018_nov_esp_01	Spain	ES	Barcelona	41.38	2.18	18	2018-11-29	Global sewage consortium	wastewater	wastewater metagenome	ERS5184491	ERX4600197	ERR4678573	Illumina	paired	Illumina NovaSeq 6000	Europe & Central Asia
ESP	DTU_2018_654_1_MG_ES_BA_342	2018_jun_esp_01	Spain	ES	Barcelona	41.38	2.18	18	2018-06-21	Global sewage consortium	wastewater	wastewater metagenome	ERS5186637	ERX4604229	ERR4682780	Illumina	paired	Illumina NovaSeq 6000	Europe & Central Asia
ESP	DTU_2016_75_4_MG_ESP-75_3	2016_pil_esp_01	Spain	ES	Barcelona	41.38	2.18	16	2016-10-02	Global sewage consortium	wastewater	wastewater metagenome	ERS2520934	ERX2624100	ERR2607444	Illumina	paired	Illumina HiSeq 3000	Europe & Central Asia
ESP	DTU_2017_527_1_MG_ES_BA_223	2017_nov_esp_01	Spain	ES	Barcelona	41.38	2.18	17	2017-11-30	Global sewage consortium	wastewater	wastewater metagenome	ERS5186487	ERX4603816	ERR4682364	Illumina	paired	Illumina NovaSeq 6000	Europe & Central Asia
ETH	DTU_2016_78_1_MG_ETH-24	2016_pil_eth_01	Ethiopia	ET	Addis Ababa	9	38.75	16	2016-01-02	Global sewage consortium	wastewater	wastewater metagenome	ERS2520938	ERX2624104	ERR2607448	Illumina	paired	Illumina HiSeq 3000	Sub-Saharan Africa
ETH	DTU_2017_625_1_MG_ET_AD_321	2017_nov_eth_01	Ethiopia	ET	Addis Ababa	9	38.75	17	2017-11-24	Global sewage consortium	wastewater	wastewater metagenome	ERS5186579	ERX4603908	ERR4682456	Illumina	paired	Illumina NovaSeq 6000	Sub-Saharan Africa
ETH	DTU_2017_357_1_MG_ET_AD	2017_jun_eth_01	Ethiopia	ET	Addis Ababa	9	38.75	17	2017-06-27	Global sewage consortium	wastewater	wastewater metagenome	ERS2597434	ERX2697843	ERR2683229	Illumina	paired	Illumina NovaSeq 6000	Sub-Saharan Africa
FIN	DTU_2018_901_2_MG_FI_HE_586_re_1	2018_nov_fin_03	Finland	FI	Helsinki	60.17	24.94	18	2018-11-13	Global sewage consortium	wastewater	wastewater metagenome	ERS5184574	ERX4600280	ERR4678656	Illumina	paired	Illumina NovaSeq 6000	Europe & Central Asia
FIN	DTU_2016_79_1_MG_FIN-25	2016_pil_fin_01	Finland	FI	Helsinki	60.17	24.94	16	2016-01-26	Global sewage consortium	wastewater	wastewater metagenome	ERS2520941	ERX2624107	ERR2607451	Illumina	paired	Illumina HiSeq 3000	Europe & Central Asia
FIN	DTU_2017_608_1_MG_FI_OU_304	2017_nov_fin_01	Finland	FI	Oulu	65.01	25.47	17	2017-11-21	Global sewage consortium	wastewater	wastewater metagenome	ERS5186562	ERX4603891	ERR4682439	Illumina	paired	Illumina NovaSeq 6000	Europe & Central Asia
FIN	DTU_2016_80_2_MG_FIN-25_1	2016_pil_fin_01	Finland	FI	Helsinki	60.17	24.94	16	2016-01-26	Global sewage consortium	wastewater	wastewater metagenome	ERS2520939	ERX2624105	ERR2607449	Illumina	paired	Illumina HiSeq 3000	Europe & Central Asia
FIN	DTU_2017_610_1_MG_FI_HE_306	2017_nov_fin_03	Finland	FI	Helsinki	60.17	24.94	17	2017-11-22	Global sewage consortium	wastewater	wastewater metagenome	ERS5186564	ERX4603893	ERR4682441	Illumina	paired	Illumina NovaSeq 6000	Europe & Central Asia
FIN	DTU_2018_899_1_MG_FI_TU_585	2018_nov_fin_02	Finland	FI	Turku	60.45	22.27	18	2018-11-14	Global sewage consortium	wastewater	wastewater metagenome	ERS5184572	ERX4600278	ERR4678654	Illumina	paired	Illumina NovaSeq 6000	Europe & Central Asia
FIN	DTU_2018_741_1_MG_FI_OU_438	2018_jun_fin_03	Finland	FI	Oulu	65.01	25.47	18	2018-06-20	Global sewage consortium	wastewater	wastewater metagenome	ERS5186720	ERX4604312	ERR4682863	Illumina	paired	Illumina NovaSeq 6000	Europe & Central Asia
FIN	DTU_2018_900_1_MG_FI_HE_586	2018_nov_fin_03	Finland	FI	Helsinki	60.17	24.94	18	2018-11-13	Global sewage consortium	wastewater	wastewater metagenome	ERS5184573	ERX4600279	ERR4678655	Illumina	paired	Illumina NovaSeq 6000	Europe & Central Asia
FIN	DTU_2018_740_1_MG_FI_HE_437	2018_jun_fin_02	Finland	FI	Helsinki	60.17	24.94	18	2018-06-20	Global sewage consortium	wastewater	wastewater metagenome	ERS5186719	ERX4604311	ERR4682862	Illumina	paired	Illumina NovaSeq 6000	Europe & Central Asia
FIN	DTU_2016_81_3_MG_FIN-25_2	2016_pil_fin_01	Finland	FI	Helsinki	60.17	24.94	16	2016-01-26	Global sewage consortium	wastewater	wastewater metagenome	ERS2520940	ERX2624106	ERR2607450	Illumina	paired	Illumina HiSeq 3000	Europe & Central Asia
FIN	DTU_2018_897_1_MG_FI_OU_584	2018_nov_fin_01	Finland	FI	Oulu	65.01	25.47	18	2018-11-01	Global sewage consortium	wastewater	wastewater metagenome	ERS5184570	ERX4600276	ERR4678652	Illumina	paired	Illumina NovaSeq 6000	Europe & Central Asia
FIN	DTU_2018_898_2_MG_FI_OU_584_re_1	2018_nov_fin_01	Finland	FI	Oulu	65.01	25.47	18	2018-11-01	Global sewage consortium	wastewater	wastewater metagenome	ERS5184571	ERX4600277	ERR4678653	Illumina	paired	Illumina NovaSeq 6000	Europe & Central Asia
FIN	DTU_2017_361_1_MG_FI_HE	2017_jun_fin_03	Finland	FI	Helsinki	60.17	24.94	17	2017-06-06	Global sewage consortium	wastewater	wastewater metagenome	ERS2597438	ERX2697847	ERR2683233	Illumina	paired	Illumina NovaSeq 6000	Europe & Central Asia
FIN	DTU_2017_359_1_MG_FI_TU	2017_jun_fin_01	Finland	FI	Turku	60.45	22.27	17	2017-06-12	Global sewage consortium	wastewater	wastewater metagenome	ERS2597436	ERX2697845	ERR2683231	Illumina	paired	Illumina NovaSeq 6000	Europe & Central Asia
FIN	DTU_2018_739_1_MG_FI_TU_436	2018_jun_fin_01	Finland	FI	Turku	60.45	22.27	18	2018-06-27	Global sewage consortium	wastewater	wastewater metagenome	ERS5186718	ERX4604310	ERR4682861	Illumina	paired	Illumina NovaSeq 6000	Europe & Central Asia
FIN	DTU_2017_609_1_MG_FI_TU_305	2017_nov_fin_02	Finland	FI	Turku	60.45	22.27	17	2017-11-22	Global sewage consortium	wastewater	wastewater metagenome	ERS5186563	ERX4603892	ERR4682440	Illumina	paired	Illumina NovaSeq 6000	Europe & Central Asia
FIN	DTU_2017_360_1_MG_FI_OU	2017_jun_fin_02	Finland	FI	Oulu	65.01	25.47	17	2017-06-12	Global sewage consortium	wastewater	wastewater metagenome	ERS2597437	ERX2697846	ERR2683232	Illumina	paired	Illumina NovaSeq 6000	Europe & Central Asia
GEO	DTU_2016_84_3_MG_GEO-59_2	2016_pil_geo_01	Georgia	GE	Tbilisi	41.69	44.8	16	2016-01-25	Global sewage consortium	wastewater	wastewater metagenome	ERS2520943	ERX2624109	ERR2607453	Illumina	paired	Illumina HiSeq 3000	Europe & Central Asia
GEO	DTU_2016_82_1_MG_GEO-59	2016_pil_geo_01	Georgia	GE	Tbilisi	41.69	44.8	16	2016-01-25	Global sewage consortium	wastewater	wastewater metagenome	ERS2520945	ERX2624111	ERR2607455	Illumina	paired	Illumina HiSeq 3000	Europe & Central Asia
GEO	DTU_2016_85_4_MG_GEO-59_3	2016_pil_geo_01	Georgia	GE	Tbilisi	41.69	44.8	16	2016-01-25	Global sewage consortium	wastewater	wastewater metagenome	ERS2520944	ERX2624110	ERR2607454	Illumina	paired	Illumina HiSeq 3000	Europe & Central Asia
GEO	DTU_2016_83_2_MG_GEO-59_1	2016_pil_geo_01	Georgia	GE	Tbilisi	41.69	44.8	16	2016-01-25	Global sewage consortium	wastewater	wastewater metagenome	ERS2520942	ERX2624108	ERR2607452	Illumina	paired	Illumina HiSeq 3000	Europe & Central Asia
GEO	DTU_2017_430_1_MG_GE_KU	2017_jun_geo_01	Georgia	GE	Kutaisi	42.26	42.67	17	2017-06-19	Global sewage consortium	wastewater	wastewater metagenome	ERS2597346	ERX2697755	ERR2683141	Illumina	paired	Illumina NovaSeq 6000	Europe & Central Asia
GHA	DTU_2017_464_1_MG_GH_TA	2017_jun_gha_03	Ghana	GH	Tamale	9.41	-0.84	17	2017-06-18	Global sewage consortium	wastewater	wastewater metagenome	ERS2597384	ERX2697793	ERR2683179	Illumina	paired	Illumina NovaSeq 6000	Sub-Saharan Africa
GHA	DTU_2018_796_1_MG_GH_AC_2_566	2018_jun_gha_02	Ghana	GH	Accra	5.56	-0.21	18	2018-07-16	Global sewage consortium	wastewater	wastewater metagenome	ERS5186768	ERX4604360	ERR4682911	Illumina	paired	Illumina NovaSeq 6000	Sub-Saharan Africa
GHA	DTU_2018_881_1_MG_GH_AC_568	2018_nov_gha_02	Ghana	GH	Accra	5.56	-0.21	18	2018-11-20	Global sewage consortium	wastewater	wastewater metagenome	ERS5184554	ERX4600260	ERR4678636	Illumina	paired	Illumina NovaSeq 6000	Sub-Saharan Africa
GHA	DTU_2018_883_1_MG_GH_KA_570	2018_nov_gha_04	Ghana	GH	Kasoa	5.53	-0.44	18	2018-11-19	Global sewage consortium	wastewater	wastewater metagenome	ERS5184556	ERX4600262	ERR4678638	Illumina	paired	Illumina NovaSeq 6000	Sub-Saharan Africa
GHA	DTU_2018_795_1_MG_GH_AC_561	2018_jun_gha_01	Ghana	GH	Accra	5.56	-0.21	18	2018-07-16	Global sewage consortium	wastewater	wastewater metagenome	ERS5186767	ERX4604359	ERR4682910	Illumina	paired	Illumina NovaSeq 6000	Sub-Saharan Africa
GHA	DTU_2017_594_1_MG_GH_TA_290	2017_nov_gha_01	Ghana	GH	Tamale	9.41	-0.84	17	2017-12-09	Global sewage consortium	wastewater	wastewater metagenome	ERS5186548	ERX4603877	ERR4682425	Illumina	paired	Illumina NovaSeq 6000	Sub-Saharan Africa
GHA	DTU_2017_341_1_MG_GH_AC	2017_jun_gha_01	Ghana	GH	Accra	5.56	-0.21	17	2017-06-16	Global sewage consortium	wastewater	wastewater metagenome	ERS2597416	ERX2697825	ERR2683211	Illumina	paired	Illumina NovaSeq 6000	Sub-Saharan Africa
GHA	DTU_2018_797_1_MG_GH_AC_3_567	2018_jun_gha_03	Ghana	GH	Accra	5.56	-0.21	18	2018-07-16	Global sewage consortium	wastewater	wastewater metagenome	ERS5186769	ERX4604361	ERR4682912	Illumina	paired	Illumina NovaSeq 6000	Sub-Saharan Africa
GHA	DTU_2017_606_1_MG_GH_KU_302	2017_nov_gha_02	Ghana	GH	Kumasi	6.7	-1.62	17	2017-11-29	Global sewage consortium	wastewater	wastewater metagenome	ERS5186560	ERX4603889	ERR4682437	Illumina	paired	Illumina NovaSeq 6000	Sub-Saharan Africa
GHA	DTU_2018_882_1_MG_GH_AC_2_569	2018_nov_gha_03	Ghana	GH	Accra	5.56	-0.21	18	2018-11-19	Global sewage consortium	wastewater	wastewater metagenome	ERS5184555	ERX4600261	ERR4678637	Illumina	paired	Illumina NovaSeq 6000	Sub-Saharan Africa
GHA	DTU_2017_342_1_MG_GH_KU	2017_jun_gha_02	Ghana	GH	Kumasi	6.7	-1.62	17	2017-06-16	Global sewage consortium	wastewater	wastewater metagenome	ERS2597417	ERX2697826	ERR2683212	Illumina	paired	Illumina NovaSeq 6000	Sub-Saharan Africa
GHA	DTU_2018_878_1_MG_GH_TA_563	2018_nov_gha_01	Ghana	GH	Tamale	9.41	-0.84	18	2019-01-19	Global sewage consortium	wastewater	wastewater metagenome	ERS5184551	ERX4600257	ERR4678633	Illumina	paired	Illumina NovaSeq 6000	Sub-Saharan Africa
GHA	DTU_2016_86_1_MG_GHA-4	2016_pil_gha_01	Ghana	GH	Tamale	9.41	-0.84	16	2016-01-30	Global sewage consortium	wastewater	wastewater metagenome	ERS2520946	ERX2624112	ERR2607456	Illumina	paired	Illumina HiSeq 3000	Sub-Saharan Africa
GMB	DTU_2016_87_1_MG_GMB-10	2016_pil_gmb_01	Gambia	GM	Banjul	13.44	-16.56	16	2016-01-28	Global sewage consortium	wastewater	wastewater metagenome	ERS2520947	ERX2624113	ERR2607457	Illumina	paired	Illumina HiSeq 3000	Sub-Saharan Africa
HRV	DTU_2016_92_5_MG_HRV-68_4	2016_pil_hrv_01	Croatia	HR	Zagreb	45.81	15.98	16	2016-01-02	Global sewage consortium	wastewater	wastewater metagenome	ERS2520951	ERX2624117	ERR2607461	Illumina	paired	Illumina HiSeq 3000	Europe & Central Asia
HRV	DTU_2016_90_3_MG_HRV-68_2	2016_pil_hrv_01	Croatia	HR	Zagreb	45.81	15.98	16	2016-01-02	Global sewage consortium	wastewater	wastewater metagenome	ERS2520949	ERX2624115	ERR2607459	Illumina	paired	Illumina HiSeq 3000	Europe & Central Asia
HRV	DTU_2017_431_1_MG_HR_ZA	2017_jun_hrv_01	Croatia	HR	Zagreb	45.81	15.98	17	2017-06-07	Global sewage consortium	wastewater	wastewater metagenome	ERS2597347	ERX2697756	ERR2683142	Illumina	paired	Illumina NovaSeq 6000	Europe & Central Asia
HRV	DTU_2018_677_1_MG_HR_ZA_365	2018_jun_hrv_01	Croatia	HR	Zagreb	45.81	15.98	18	2018-07-02	Global sewage consortium	wastewater	wastewater metagenome	ERS5186659	ERX4604251	ERR4682802	Illumina	paired	Illumina NovaSeq 6000	Europe & Central Asia
HRV	DTU_2018_814_1_MG_HR_ZA_498	2018_nov_hrv_01	Croatia	HR	Zagreb	45.81	15.98	18	2018-12-05	Global sewage consortium	wastewater	wastewater metagenome	ERS5184490	ERX4600196	ERR4678572	Illumina	paired	Illumina NovaSeq 6000	Europe & Central Asia
HRV	DTU_2017_496_1_MG_HR_ZA_192	2017_nov_hrv_01	Croatia	HR	Zagreb	45.81	15.98	17	2017-11-13	Global sewage consortium	wastewater	wastewater metagenome	ERS5186460	ERX4603789	ERR4682337	Illumina	paired	Illumina NovaSeq 6000	Europe & Central Asia
HRV	DTU_2016_91_4_MG_HRV-68_3	2016_pil_hrv_01	Croatia	HR	Zagreb	45.81	15.98	16	2016-01-02	Global sewage consortium	wastewater	wastewater metagenome	ERS2520950	ERX2624116	ERR2607460	Illumina	paired	Illumina HiSeq 3000	Europe & Central Asia
HRV	DTU_2016_89_2_MG_HRV-68_1	2016_pil_hrv_01	Croatia	HR	Zagreb	45.81	15.98	16	2016-01-02	Global sewage consortium	wastewater	wastewater metagenome	ERS2520948	ERX2624114	ERR2607458	Illumina	paired	Illumina HiSeq 3000	Europe & Central Asia
HRV	DTU_2016_88_1_MG_HRV-68	2016_pil_hrv_01	Croatia	HR	Zagreb	45.81	15.98	16	2016-01-02	Global sewage consortium	wastewater	wastewater metagenome	ERS2520952	ERX2624118	ERR2607462	Illumina	paired	Illumina HiSeq 3000	Europe & Central Asia
HUN	DTU_2016_93_1_MG_HUN-61	2016_pil_hun_01	Hungary	HU	Budapest	47.48	19.15	16	2016-02-02	Global sewage consortium	wastewater	wastewater metagenome	ERS2520953	ERX2624119	ERR2607463	Illumina	paired	Illumina HiSeq 3000	Europe & Central Asia
HUN	DTU_2018_671_1_MG_HU_BU_359	2018_jun_hun_01	Hungary	HU	Budapest	47.48	19.15	18	2018-06-25	Global sewage consortium	wastewater	wastewater metagenome	ERS5186653	ERX4604245	ERR4682796	Illumina	paired	Illumina NovaSeq 6000	Europe & Central Asia
HUN	DTU_2017_388_1_MG_HU_BU	2017_jun_hun_01	Hungary	HU	Budapest	47.48	19.15	17	2017-06-08	Global sewage consortium	wastewater	wastewater metagenome	ERS2597468	ERX2697877	ERR2683263	Illumina	paired	Illumina NovaSeq 6000	Europe & Central Asia
HUN	DTU_2017_539_1_MG_HU_BU_235	2017_nov_hun_01	Hungary	HU	Budapest	47.48	19.15	17	2017-11-30	Global sewage consortium	wastewater	wastewater metagenome	ERS5186499	ERX4603828	ERR4682376	Illumina	paired	Illumina NovaSeq 6000	Europe & Central Asia
HUN	DTU_2018_811_1_MG_HU_BU_495	2018_nov_hun_01	Hungary	HU	Budapest	47.48	19.15	18	2018-11-26	Global sewage consortium	wastewater	wastewater metagenome	ERS5184488	ERX4600194	ERR4678570	Illumina	paired	Illumina NovaSeq 6000	Europe & Central Asia
HUN	DTU_2017_555_1_MG_HU_SK_251	2017_nov_hun_02	Hungary	HU	Szekesfehervar	47.19	18.41	17	2017-11-27	Global sewage consortium	wastewater	wastewater metagenome	ERS5186515	ERX4603844	ERR4682392	Illumina	paired	Illumina NovaSeq 6000	Europe & Central Asia
HUN	DTU_2018_817_1_MG_HU_SK_501	2018_nov_hun_02	Hungary	HU	Szekesfehervar	47.19	18.41	18	2018-12-06	Global sewage consortium	wastewater	wastewater metagenome	ERS5184493	ERX4600199	ERR4678575	Illumina	paired	Illumina NovaSeq 6000	Europe & Central Asia
IND	DTU_2016_94_1_MG_IND-11	2016_pil_ind_01	India	IN	Cochin	10.15	76.39	16	2016-01-27	Global sewage consortium	wastewater	wastewater metagenome	ERS2520956	ERX2624122	ERR2607466	Illumina	paired	Illumina HiSeq 3000	South Asia
IND	DTU_2018_838_1_MG_IN_UD_522	2018_nov_ind_01	India	IN	Udupi	13.34	74.75	18	2018-11-28	Global sewage consortium	wastewater	wastewater metagenome	ERS5184514	ERX4600220	ERR4678596	Illumina	paired	Illumina NovaSeq 6000	South Asia
IND	DTU_2016_96_3_MG_IND-11_2	2016_pil_ind_01	India	IN	Cochin	10.15	76.39	16	2016-01-27	Global sewage consortium	wastewater	wastewater metagenome	ERS2520955	ERX2624121	ERR2607465	Illumina	paired	Illumina HiSeq 3000	South Asia
IND	DTU_2018_698_1_MG_IN_KO_387	2018_jun_ind_01	India	IN	Kochi	9.98	76.25	18	2018-07-04	Global sewage consortium	wastewater	wastewater metagenome	ERS5186678	ERX4604270	ERR4682821	Illumina	paired	Illumina NovaSeq 6000	South Asia
IND	DTU_2017_448_1_MG_IN_MP	2017_jun_ind_02	India	IN	Udupi	13.34	74.75	17	2017-06-19	Global sewage consortium	wastewater	wastewater metagenome	ERS2597366	ERX2697775	ERR2683161	Illumina	paired	Illumina NovaSeq 6000	South Asia
IND	DTU_2018_851_1_MG_IN_KO_535	2018_nov_ind_02	India	IN	Kochi	9.98	76.25	18	2018-12-20	Global sewage consortium	wastewater	wastewater metagenome	ERS5184524	ERX4600230	ERR4678606	Illumina	paired	Illumina NovaSeq 6000	South Asia
IND	DTU_2017_392_1_MG_IN_CO	2017_jun_ind_01	India	IN	Kochi	9.98	76.25	17	2017-06-13	Global sewage consortium	wastewater	wastewater metagenome	ERS2597472	ERX2697881	ERR2683267	Illumina	paired	Illumina NovaSeq 6000	South Asia
IND	DTU_2017_544_1_MG_IN_CO_240	2017_nov_ind_01	India	IN	Kochi	9.98	76.25	17	2017-11-24	Global sewage consortium	wastewater	wastewater metagenome	ERS5186504	ERX4603833	ERR4682381	Illumina	paired	Illumina NovaSeq 6000	South Asia
IND	DTU_2018_714_1_MG_IN_UD_411	2018_jun_ind_02	India	IN	Udupi	13.34	74.75	18	2018-06-18	Global sewage consortium	wastewater	wastewater metagenome	ERS5186694	ERX4604286	ERR4682837	Illumina	paired	Illumina NovaSeq 6000	South Asia
IND	DTU_2017_548_1_MG_IN_MP_244	2017_nov_ind_02	India	IN	Manipal	13.35	74.79	17	2017-11-23	Global sewage consortium	wastewater	wastewater metagenome	ERS5186508	ERX4603837	ERR4682385	Illumina	paired	Illumina NovaSeq 6000	South Asia
IRL	DTU_2016_98_2_MG_IRL-69_1	2016_pil_irl_01	Ireland	IE	Dublin	53.35	-6.26	16	2016-10-02	Global sewage consortium	wastewater	wastewater metagenome	ERS2520957	ERX2624123	ERR2607467	Illumina	paired	Illumina HiSeq 3000	Europe & Central Asia
IRL	DTU_2016_97_1_MG_IRL-69	2016_pil_irl_01	Ireland	IE	Dublin	53.35	-6.26	16	2016-10-02	Global sewage consortium	wastewater	wastewater metagenome	ERS2520959	ERX2624125	ERR2607469	Illumina	paired	Illumina HiSeq 3000	Europe & Central Asia
IRL	DTU_2017_353_1_MG_IE_GA	2017_jun_irl_01	Ireland	IE	Galway	53.27	-9.05	17	2017-06-12	Global sewage consortium	wastewater	wastewater metagenome	ERS2597429	ERX2697838	ERR2683224	Illumina	paired	Illumina NovaSeq 6000	Europe & Central Asia
IRL	DTU_2016_99_3_MG_IRL-69_2	2016_pil_irl_01	Ireland	IE	Dublin	53.35	-6.26	16	2016-10-02	Global sewage consortium	wastewater	wastewater metagenome	ERS2520958	ERX2624124	ERR2607468	Illumina	paired	Illumina HiSeq 3000	Europe & Central Asia
IRL	DTU_2017_554_1_MG_IE_GA_250	2017_nov_irl_01	Ireland	IE	Galway	53.27	-9.05	17	2017-11-27	Global sewage consortium	wastewater	wastewater metagenome	ERS5186514	ERX4603843	ERR4682391	Illumina	paired	Illumina NovaSeq 6000	Europe & Central Asia
IRN	DTU_2017_465_1_MG_IR_TH	2017_jun_irn_01	Iran	IR	Tehran	35.7	51.4	17	2017-06-11	Global sewage consortium	wastewater	wastewater metagenome	ERS2597385	ERX2697794	ERR2683180	Illumina	paired	Illumina NovaSeq 6000	Middle East & North Africa
IRN	DTU_2017_573_1_MG_IR_SH_269	2017_nov_irn_01	Iran	IR	Shiraz	29.61	52.54	17	2017-11-30	Global sewage consortium	wastewater	wastewater metagenome	ERS5186527	ERX4603856	ERR4682404	Illumina	paired	Illumina NovaSeq 6000	Middle East & North Africa
IRN	DTU_2016_101_2_MG_IRN-12_1	2016_pil_irn_01	Iran	IR	Tehran	35.7	51.4	16	2016-02-02	Global sewage consortium	wastewater	wastewater metagenome	ERS2520960	ERX2624126	ERR2607470	Illumina	paired	Illumina HiSeq 3000	Middle East & North Africa
IRN	DTU_2016_237_2_MG_Reproduce_12_3	2016_pil_irn_03	Iran	IR	Tehran	35.7	51.4	16	2016-02-03	Global sewage consortium	wastewater	wastewater metagenome	--	--	--	Illumina	paired	Illumina HiSeq 3000	Middle East & North Africa
IRN	DTU_2017_629_1_MG_IR_TH_325	2017_nov_irn_02	Iran	IR	Tehran	35.7	51.4	17	2018-10-01	Global sewage consortium	wastewater	wastewater metagenome	ERS5186583	ERX4603912	ERR4682460	Illumina	paired	Illumina NovaSeq 6000	Middle East & North Africa
IRN	DTU_2016_236_1_MG_Reproduce_12_1	2016_pil_irn_02	Iran	IR	Tehran	35.7	51.4	16	2016-02-03	Global sewage consortium	wastewater	wastewater metagenome	--	--	--	Illumina	paired	Illumina HiSeq 3000	Middle East & North Africa
IRN	DTU_2016_100_1_MG_IRN-12	2016_pil_irn_01	Iran	IR	Tehran	35.7	51.4	16	2016-02-02	Global sewage consortium	wastewater	wastewater metagenome	ERS2520962	ERX2624128	ERR2607472	Illumina	paired	Illumina HiSeq 3000	Middle East & North Africa
IRN	DTU_2016_102_3_MG_IRN-12_2	2016_pil_irn_01	Iran	IR	Tehran	35.7	51.4	16	2016-02-02	Global sewage consortium	wastewater	wastewater metagenome	ERS2520961	ERX2624127	ERR2607471	Illumina	paired	Illumina HiSeq 3000	Middle East & North Africa
IRN	DTU_2017_472_1_MG_IR_SH	2017_jun_irn_02	Iran	IR	Shiraz	29.61	52.54	17	2017-06-15	Global sewage consortium	wastewater	wastewater metagenome	ERS2597392	ERX2697801	ERR2683187	Illumina	paired	Illumina NovaSeq 6000	Middle East & North Africa
ISL	DTU_2017_409_1_MG_IS_RE	2017_jun_isl_01	Iceland	IS	Reykjavik	64.15	-21.94	17	2017-06-18	Global sewage consortium	wastewater	wastewater metagenome	ERS2597324	ERX2697733	ERR2683119	Illumina	paired	Illumina NovaSeq 6000	Europe & Central Asia
ISL	DTU_2016_103_1_MG_ISL-28	2016_pil_isl_01	Iceland	IS	Reykjavik	64.15	-21.94	16	2016-02-02	Global sewage consortium	wastewater	wastewater metagenome	ERS2520965	ERX2624131	ERR2607475	Illumina	paired	Illumina HiSeq 3000	Europe & Central Asia
ISL	DTU_2018_821_1_MG_IS_RE_505	2018_nov_isl_01	Iceland	IS	Reykjavik	64.15	-21.94	18	2018-12-05	Global sewage consortium	wastewater	wastewater metagenome	ERS5184497	ERX4600203	ERR4678579	Illumina	paired	Illumina NovaSeq 6000	Europe & Central Asia
ISL	DTU_2017_532_1_MG_IS_RE_228	2017_nov_isl_01	Iceland	IS	Reykjavik	64.15	-21.94	17	2017-11-24	Global sewage consortium	wastewater	wastewater metagenome	ERS5186492	ERX4603821	ERR4682369	Illumina	paired	Illumina NovaSeq 6000	Europe & Central Asia
ISL	DTU_2016_105_3_MG_ISL-28_2	2016_pil_isl_01	Iceland	IS	Reykjavik	64.15	-21.94	16	2016-02-02	Global sewage consortium	wastewater	wastewater metagenome	ERS2520964	ERX2624130	ERR2607474	Illumina	paired	Illumina HiSeq 3000	Europe & Central Asia
ISL	DTU_2016_104_2_MG_ISL-28_1	2016_pil_isl_01	Iceland	IS	Reykjavik	64.15	-21.94	16	2016-02-02	Global sewage consortium	wastewater	wastewater metagenome	ERS2520963	ERX2624129	ERR2607473	Illumina	paired	Illumina HiSeq 3000	Europe & Central Asia
ISR	DTU_2016_108_3_MG_ISR-29_2	2016_pil_isr_01	Israel	IL	Jerusalem	31.78	35.23	16	2016-01-31	Global sewage consortium	wastewater	wastewater metagenome	ERS2520967	ERX2624133	ERR2607477	Illumina	paired	Illumina HiSeq 3000	Middle East & North Africa
ISR	DTU_2018_744_1_MG_IL_BE_441	2018_jun_isr_01	Israel	IL	Beer-Sheva	31.25	34.79	18	2018-07-07	Global sewage consortium	wastewater	wastewater metagenome	ERS5186723	ERX4604315	ERR4682866	Illumina	paired	Illumina NovaSeq 6000	Middle East & North Africa
ISR	DTU_2018_805_1_MG_IL_BE_489	2018_nov_isr_01	Israel	IL	Beer-Sheva	31.25	34.79	18	2018-11-26	Global sewage consortium	wastewater	wastewater metagenome	ERS5184482	ERX4600188	ERR4678564	Illumina	paired	Illumina NovaSeq 6000	Middle East & North Africa
ISR	DTU_2017_381_1_MG_IL_BE	2017_jun_isr_01	Israel	IL	Beer-Sheva	31.25	34.79	17	2017-06-12	Global sewage consortium	wastewater	wastewater metagenome	ERS2597460	ERX2697869	ERR2683255	Illumina	paired	Illumina NovaSeq 6000	Middle East & North Africa
ISR	DTU_2017_601_1_MG_IL_BE_297	2017_nov_isr_01	Israel	IL	Beer-Sheva	31.25	34.79	17	2017-12-06	Global sewage consortium	wastewater	wastewater metagenome	ERS5186555	ERX4603884	ERR4682432	Illumina	paired	Illumina NovaSeq 6000	Middle East & North Africa
ISR	DTU_2016_106_1_MG_ISR-29	2016_pil_isr_01	Israel	IL	Jerusalem	31.78	35.23	16	2016-01-31	Global sewage consortium	wastewater	wastewater metagenome	ERS2520968	ERX2624134	ERR2607478	Illumina	paired	Illumina HiSeq 3000	Middle East & North Africa
ISR	DTU_2016_107_2_MG_ISR-29_1	2016_pil_isr_01	Israel	IL	Jerusalem	31.78	35.23	16	2016-01-31	Global sewage consortium	wastewater	wastewater metagenome	ERS2520966	ERX2624132	ERR2607476	Illumina	paired	Illumina HiSeq 3000	Middle East & North Africa
ITA	DTU_2017_490_1_MG_IT_VE_186	2017_nov_ita_02	Italy	IT	Verbania	45.92	8.55	17	2017-11-20	Global sewage consortium	wastewater	wastewater metagenome	ERS5186454	ERX4603783	ERR4682331	Illumina	paired	Illumina NovaSeq 6000	Europe & Central Asia
ITA	DTU_2016_109_1_MG_ITA-30	2016_pil_ita_01	Italy	IT	Rome	41.89	12.48	16	2016-02-02	Global sewage consortium	wastewater	wastewater metagenome	ERS2520969	ERX2624135	ERR2607479	Illumina	paired	Illumina HiSeq 3000	Europe & Central Asia
ITA	DTU_2017_491_1_MG_IT_CA_187	2017_nov_ita_03	Italy	IT	Cannobio	46.06	8.7	17	2017-11-20	Global sewage consortium	wastewater	wastewater metagenome	ERS5186455	ERX4603784	ERR4682332	Illumina	paired	Illumina NovaSeq 6000	Europe & Central Asia
ITA	DTU_2018_896_1_MG_IT_RO_583	2018_nov_ita_04	Italy	IT	Rome	41.89	12.48	18	2018-11-26	Global sewage consortium	wastewater	wastewater metagenome	ERS5184569	ERX4600275	ERR4678651	Illumina	paired	Illumina NovaSeq 6000	Europe & Central Asia
ITA	DTU_2018_862_1_MG_IT_VE_546	2018_nov_ita_02	Italy	IT	Verbania	45.92	8.55	18	2018-12-13	Global sewage consortium	wastewater	wastewater metagenome	ERS5184535	ERX4600241	ERR4678617	Illumina	paired	Illumina NovaSeq 6000	Europe & Central Asia
ITA	DTU_2017_434_1_MG_IT_RO	2017_jun_ita_04	Italy	IT	Rome	41.89	12.48	17	2017-06-05	Global sewage consortium	wastewater	wastewater metagenome	ERS2597351	ERX2697760	ERR2683146	Illumina	paired	Illumina NovaSeq 6000	Europe & Central Asia
ITA	DTU_2017_489_1_MG_IT_NO_185	2017_nov_ita_01	Italy	IT	Novara	45.58	8.55	17	2017-11-20	Global sewage consortium	wastewater	wastewater metagenome	ERS5186453	ERX4603782	ERR4682330	Illumina	paired	Illumina NovaSeq 6000	Europe & Central Asia
ITA	DTU_2018_863_1_MG_IT_CA_547	2018_nov_ita_03	Italy	IT	Cannobio	46.06	8.7	18	2018-12-13	Global sewage consortium	wastewater	wastewater metagenome	ERS5184536	ERX4600242	ERR4678618	Illumina	paired	Illumina NovaSeq 6000	Europe & Central Asia
ITA	DTU_2018_703_1_MG_IT_RO_391	2018_jun_ita_04	Italy	IT	Rome	41.89	12.48	18	2018-06-26	Global sewage consortium	wastewater	wastewater metagenome	ERS5186683	ERX4604275	ERR4682826	Illumina	paired	Illumina NovaSeq 6000	Europe & Central Asia
ITA	DTU_2018_674_1_MG_IT_CA_362	2018_jun_ita_03	Italy	IT	Cannobio	46.06	8.7	18	2018-06-28	Global sewage consortium	wastewater	wastewater metagenome	ERS5186656	ERX4604248	ERR4682799	Illumina	paired	Illumina NovaSeq 6000	Europe & Central Asia
ITA	DTU_2017_352_1_MG_IT_NO	2017_jun_ita_03	Italy	IT	Novara	45.58	8.55	17	2017-06-12	Global sewage consortium	wastewater	wastewater metagenome	ERS2597428	ERX2697837	ERR2683223	Illumina	paired	Illumina NovaSeq 6000	Europe & Central Asia
ITA	DTU_2018_860_1_MG_IT_NO_544	2018_nov_ita_01	Italy	IT	Novara	45.58	8.55	18	2018-12-14	Global sewage consortium	wastewater	wastewater metagenome	ERS5184533	ERX4600239	ERR4678615	Illumina	paired	Illumina NovaSeq 6000	Europe & Central Asia
ITA	DTU_2018_672_1_MG_IT_NO_360	2018_jun_ita_01	Italy	IT	Novara	45.58	8.55	18	2018-06-29	Global sewage consortium	wastewater	wastewater metagenome	ERS5186654	ERX4604246	ERR4682797	Illumina	paired	Illumina NovaSeq 6000	Europe & Central Asia
ITA	DTU_2017_557_1_MG_IT_RO_253	2017_nov_ita_04	Italy	IT	Rome	41.89	12.48	17	2017-11-20	Global sewage consortium	wastewater	wastewater metagenome	ERS5186517	ERX4603846	ERR4682394	Illumina	paired	Illumina NovaSeq 6000	Europe & Central Asia
ITA	DTU_2018_673_1_MG_IT_VE_361	2018_jun_ita_02	Italy	IT	Verbania	45.92	8.55	18	2018-06-28	Global sewage consortium	wastewater	wastewater metagenome	ERS5186655	ERX4604247	ERR4682798	Illumina	paired	Illumina NovaSeq 6000	Europe & Central Asia
ITA	DTU_2017_350_1_MG_IT_VE	2017_jun_ita_01	Italy	IT	Verbania	45.92	8.55	17	2017-06-12	Global sewage consortium	wastewater	wastewater metagenome	ERS2597426	ERX2697835	ERR2683221	Illumina	paired	Illumina NovaSeq 6000	Europe & Central Asia
ITA	DTU_2017_351_1_MG_IT_CA	2017_jun_ita_02	Italy	IT	Cannobio	46.06	8.7	17	2017-06-12	Global sewage consortium	wastewater	wastewater metagenome	ERS2597427	ERX2697836	ERR2683222	Illumina	paired	Illumina NovaSeq 6000	Europe & Central Asia
KAZ	DTU_2017_461_1_MG_KZ_AL	2017_jun_kaz_01	Kazakhstan	KZ	Almaty	43.24	76.95	17	2017-07-12	Global sewage consortium	wastewater	wastewater metagenome	ERS2597380	ERX2697789	ERR2683175	Illumina	paired	Illumina NovaSeq 6000	Europe & Central Asia
KAZ	DTU_2016_110_1_MG_KAZ-6	2016_pil_kaz_01	Kazakhstan	KZ	Almaty	43.24	76.95	16	2016-02-02	Global sewage consortium	wastewater	wastewater metagenome	ERS2520970	ERX2624136	ERR2607480	Illumina	paired	Illumina HiSeq 3000	Europe & Central Asia
KEN	DTU_2018_750_1_MG_KE_NA_447	2018_jun_ken_01	Kenya	KE	Nairobi	-1.28	36.82	18	2018-06-29	Global sewage consortium	wastewater	wastewater metagenome	ERS5186727	ERX4604319	ERR4682870	Illumina	paired	Illumina NovaSeq 6000	Sub-Saharan Africa
KEN	DTU_2016_114_4_MG_KEN-72_3	2016_pil_ken_01	Kenya	KE	Thika	-1.04	37.08	16	2016-08-02	Global sewage consortium	wastewater	wastewater metagenome	ERS2520973	ERX2624139	ERR2607483	Illumina	paired	Illumina HiSeq 3000	Sub-Saharan Africa
KEN	DTU_2016_113_3_MG_KEN-72_2	2016_pil_ken_01	Kenya	KE	Thika	-1.04	37.08	16	2016-08-02	Global sewage consortium	wastewater	wastewater metagenome	ERS2520972	ERX2624138	ERR2607482	Illumina	paired	Illumina HiSeq 3000	Sub-Saharan Africa
KEN	DTU_2016_112_2_MG_KEN-72_1	2016_pil_ken_01	Kenya	KE	Thika	-1.04	37.08	16	2016-08-02	Global sewage consortium	wastewater	wastewater metagenome	ERS2520971	ERX2624137	ERR2607481	Illumina	paired	Illumina HiSeq 3000	Sub-Saharan Africa
KEN	DTU_2016_111_1_MG_KEN-72	2016_pil_ken_01	Kenya	KE	Thika	-1.04	37.08	16	2016-08-02	Global sewage consortium	wastewater	wastewater metagenome	ERS2520974	ERX2624140	ERR2607484	Illumina	paired	Illumina HiSeq 3000	Sub-Saharan Africa
KEN	DTU_2017_460_1_MG_KE_NA	2017_jun_ken_01	Kenya	KE	Nairobi	-1.28	36.82	17	2017-06-13	Global sewage consortium	wastewater	wastewater metagenome	ERS2597379	ERX2697788	ERR2683174	Illumina	paired	Illumina NovaSeq 6000	Sub-Saharan Africa
KHM	DTU_2017_495_1_MG_KH_PP_191	2017_nov_khm_01	Cambodia	KH	Phnom Penh	11.57	104.92	17	2017-11-20	Global sewage consortium	wastewater	wastewater metagenome	ERS5186459	ERX4603788	ERR4682336	Illumina	paired	Illumina NovaSeq 6000	East Asia & Pacific
KHM	DTU_2018_854_1_MG_KH_PP_538	2018_nov_khm_01	Cambodia	KH	Phnom Penh	11.57	104.92	18	2019-01-03	Global sewage consortium	wastewater	wastewater metagenome	ERS5184527	ERX4600233	ERR4678609	Illumina	paired	Illumina NovaSeq 6000	East Asia & Pacific
KHM	DTU_2016_115_1_MG_KHM-21	2016_pil_khm_01	Cambodia	KH	Phnom Penh	11.57	104.92	16	2016-05-02	Global sewage consortium	wastewater	wastewater metagenome	ERS2520975	ERX2624141	ERR2607485	Illumina	paired	Illumina HiSeq 3000	East Asia & Pacific
KHM	DTU_2017_457_1_MG_KH_PP	2017_jun_khm_01	Cambodia	KH	Phnom Penh	11.57	104.92	17	2017-06-13	Global sewage consortium	wastewater	wastewater metagenome	ERS2597376	ERX2697785	ERR2683171	Illumina	paired	Illumina NovaSeq 6000	East Asia & Pacific
KHM	DTU_2018_653_1_MG_KH_PP_341	2018_jun_khm_01	Cambodia	KH	Phnom Penh	11.57	104.92	18	2018-06-22	Global sewage consortium	wastewater	wastewater metagenome	ERS5186636	ERX4604228	ERR4682779	Illumina	paired	Illumina NovaSeq 6000	East Asia & Pacific
LKA	DTU_2017_471_1_MG_LK_MA	2017_jun_lka_05	Sri Lanka	LK	Colombo	6.93	79.85	17	2017-07-25	Global sewage consortium	wastewater	wastewater metagenome	ERS2597391	ERX2697800	ERR2683186	Illumina	paired	Illumina NovaSeq 6000	South Asia
LKA	DTU_2017_470_1_MG_LK_CO	2017_jun_lka_04	Sri Lanka	LK	Colombo	6.93	79.85	17	2017-07-25	Global sewage consortium	wastewater	wastewater metagenome	ERS2597390	ERX2697799	ERR2683185	Illumina	paired	Illumina NovaSeq 6000	South Asia
LKA	DTU_2017_469_1_MG_LK_BO	2017_jun_lka_03	Sri Lanka	LK	Colombo	6.93	79.85	17	2017-07-25	Global sewage consortium	wastewater	wastewater metagenome	ERS2597389	ERX2697798	ERR2683184	Illumina	paired	Illumina NovaSeq 6000	South Asia
LKA	DTU_2016_116_1_MG_LKA-40	2016_pil_lka_01	Sri Lanka	LK	Colombo	6.93	79.85	16	2016-02-28	Global sewage consortium	wastewater	wastewater metagenome	ERS2520976	ERX2624142	ERR2607486	Illumina	paired	Illumina HiSeq 3000	South Asia
LKA	DTU_2017_467_1_MG_LK_RA	2017_jun_lka_01	Sri Lanka	LK	Raddolugama	7.14	79.9	17	2017-07-11	Global sewage consortium	wastewater	wastewater metagenome	ERS2597387	ERX2697796	ERR2683182	Illumina	paired	Illumina NovaSeq 6000	South Asia
LKA	DTU_2017_468_1_MG_LK_MO	2017_jun_lka_02	Sri Lanka	LK	Rathmalana	6.82	79.87	17	2017-07-13	Global sewage consortium	wastewater	wastewater metagenome	ERS2597388	ERX2697797	ERR2683183	Illumina	paired	Illumina NovaSeq 6000	South Asia
LUX	DTU_2017_574_1_MG_LU_LU_270	2017_nov_lux_01	Luxembourg	LU	Luxembourg	49.82	6.13	17	2017-12-01	Global sewage consortium	wastewater	wastewater metagenome	ERS5186528	ERX4603857	ERR4682405	Illumina	paired	Illumina NovaSeq 6000	Europe & Central Asia
LUX	DTU_2016_117_1_MG_LUX-32	2016_pil_lux_01	Luxembourg	LU	Belvaux	49.51	5.93	16	2016-01-02	Global sewage consortium	wastewater	wastewater metagenome	ERS2520977	ERX2624143	ERR2607487	Illumina	paired	Illumina HiSeq 3000	Europe & Central Asia
LUX	DTU_2017_433_1_MG_LU_LU	2017_jun_lux_01	Luxembourg	LU	Luxembourg	49.82	6.13	17	2017-06-13	Global sewage consortium	wastewater	wastewater metagenome	ERS2597349	ERX2697758	ERR2683144	Illumina	paired	Illumina NovaSeq 6000	Europe & Central Asia
LVA	DTU_2018_803_1_MG_LV_RI_487	2018_nov_lva_01	Latvia	LV	Riga	56.95	24.11	18	2018-11-16	Global sewage consortium	wastewater	wastewater metagenome	ERS5184480	ERX4600186	ERR4678562	Illumina	paired	Illumina NovaSeq 6000	Europe & Central Asia
LVA	DTU_2016_118_1_MG_LVA-31	2016_pil_lva_01	Latvia	LV	Riga	56.95	24.11	16	2016-01-02	Global sewage consortium	wastewater	wastewater metagenome	ERS2520981	ERX2624147	ERR2607491	Illumina	paired	Illumina HiSeq 3000	Europe & Central Asia
LVA	DTU_2018_804_1_MG_LV_LI_488	2018_nov_lva_02	Latvia	LV	Liepaja	56.5	21.01	18	2018-11-07	Global sewage consortium	wastewater	wastewater metagenome	ERS5184481	ERX4600187	ERR4678563	Illumina	paired	Illumina NovaSeq 6000	Europe & Central Asia
LVA	DTU_2018_732_1_MG_LV_RI_429	2018_jun_lva_01	Latvia	LV	Riga	56.95	24.11	18	2018-06-20	Global sewage consortium	wastewater	wastewater metagenome	ERS5186711	ERX4604303	ERR4682854	Illumina	paired	Illumina NovaSeq 6000	Europe & Central Asia
LVA	DTU_2018_733_1_MG_LV_LI_430	2018_jun_lva_02	Latvia	LV	Liepaja	56.5	21.01	18	2018-06-21	Global sewage consortium	wastewater	wastewater metagenome	ERS5186712	ERX4604304	ERR4682855	Illumina	paired	Illumina NovaSeq 6000	Europe & Central Asia
LVA	DTU_2017_377_1_MG_LV_RI	2017_jun_lva_01	Latvia	LV	Riga	56.95	24.11	17	2017-06-06	Global sewage consortium	wastewater	wastewater metagenome	ERS2597456	ERX2697865	ERR2683251	Illumina	paired	Illumina NovaSeq 6000	Europe & Central Asia
LVA	DTU_2016_119_2_MG_LVA-31_1	2016_pil_lva_01	Latvia	LV	Riga	56.95	24.11	16	2016-01-02	Global sewage consortium	wastewater	wastewater metagenome	ERS2520978	ERX2624144	ERR2607488	Illumina	paired	Illumina HiSeq 3000	Europe & Central Asia
LVA	DTU_2016_121_4_MG_LVA-31_3	2016_pil_lva_01	Latvia	LV	Riga	56.95	24.11	16	2016-01-02	Global sewage consortium	wastewater	wastewater metagenome	ERS2520980	ERX2624146	ERR2607490	Illumina	paired	Illumina HiSeq 3000	Europe & Central Asia
LVA	DTU_2016_120_3_MG_LVA-31_2	2016_pil_lva_01	Latvia	LV	Riga	56.95	24.11	16	2016-01-02	Global sewage consortium	wastewater	wastewater metagenome	ERS2520979	ERX2624145	ERR2607489	Illumina	paired	Illumina HiSeq 3000	Europe & Central Asia
LVA	DTU_2017_378_1_MG_LV_LI	2017_jun_lva_02	Latvia	LV	Liepaja	56.5	21.01	17	2017-06-12	Global sewage consortium	wastewater	wastewater metagenome	ERS2597457	ERX2697866	ERR2683252	Illumina	paired	Illumina NovaSeq 6000	Europe & Central Asia
MDA	DTU_2016_122_1_MG_MDA-65	2016_pil_mda_01	Moldova	MD	Chisinau	47.02	28.83	16	2016-02-04	Global sewage consortium	wastewater	wastewater metagenome	ERS2520984	ERX2624150	ERR2607494	Illumina	paired	Illumina HiSeq 3000	Europe & Central Asia
MDA	DTU_2016_123_2_MG_MDA-65_1	2016_pil_mda_01	Moldova	MD	Chisinau	47.02	28.83	16	2016-02-04	Global sewage consortium	wastewater	wastewater metagenome	ERS2520982	ERX2624148	ERR2607492	Illumina	paired	Illumina HiSeq 3000	Europe & Central Asia
MDA	DTU_2016_124_3_MG_MDA-65_2	2016_pil_mda_01	Moldova	MD	Chisinau	47.02	28.83	16	2016-02-04	Global sewage consortium	wastewater	wastewater metagenome	ERS2520983	ERX2624149	ERR2607493	Illumina	paired	Illumina HiSeq 3000	Europe & Central Asia
MKD	DTU_2017_463_1_MG_MK_SK	2017_jun_mkd_01	Macedonia	MK	Skopje	42	21.43	17	2017-06-15	Global sewage consortium	wastewater	wastewater metagenome	ERS2597382	ERX2697791	ERR2683177	Illumina	paired	Illumina NovaSeq 6000	Europe & Central Asia
MKD	DTU_2018_755_1_MG_MK_SK_452	2018_jun_mkd_01	Macedonia	MK	Skopje	42	21.43	18	2018	Global sewage consortium	wastewater	wastewater metagenome	ERS5186732	ERX4604324	ERR4682875	Illumina	paired	Illumina NovaSeq 6000	Europe & Central Asia
MKD	DTU_2016_125_1_MG_MKD-62	2016_pil_mkd_01	Macedonia	MK	Skopje	42	21.43	16	2016-02-02	Global sewage consortium	wastewater	wastewater metagenome	ERS2520988	ERX2624154	ERR2607498	Illumina	paired	Illumina HiSeq 3000	Europe & Central Asia
MKD	DTU_2016_128_4_MG_MKD-62_3	2016_pil_mkd_01	Macedonia	MK	Skopje	42	21.43	16	2016-02-02	Global sewage consortium	wastewater	wastewater metagenome	ERS2520987	ERX2624153	ERR2607497	Illumina	paired	Illumina HiSeq 3000	Europe & Central Asia
MKD	DTU_2018_756_1_MG_MK_SK_453	2018_jun_mkd_02	Macedonia	MK	Skopje	42	21.43	18	2018	Global sewage consortium	wastewater	wastewater metagenome	ERS5186733	ERX4604325	ERR4682876	Illumina	paired	Illumina NovaSeq 6000	Europe & Central Asia
MKD	DTU_2016_127_3_MG_MKD-62_2	2016_pil_mkd_01	Macedonia	MK	Skopje	42	21.43	16	2016-02-02	Global sewage consortium	wastewater	wastewater metagenome	ERS2520986	ERX2624152	ERR2607496	Illumina	paired	Illumina HiSeq 3000	Europe & Central Asia
MKD	DTU_2016_126_2_MG_MKD-62_1	2016_pil_mkd_01	Macedonia	MK	Skopje	42	21.43	16	2016-02-02	Global sewage consortium	wastewater	wastewater metagenome	ERS2520985	ERX2624151	ERR2607495	Illumina	paired	Illumina HiSeq 3000	Europe & Central Asia
MLT	DTU_2017_386_1_MG_MT_MN	2017_jun_mlt_02	Malta	MT	Cirkewwa	35.98	14.34	17	2017-06-13	Global sewage consortium	wastewater	wastewater metagenome	ERS2597466	ERX2697875	ERR2683261	Illumina	paired	Illumina NovaSeq 6000	Middle East & North Africa
MLT	DTU_2017_387_1_MG_MT_GO	2017_jun_mlt_03	Malta	MT	Ghajnsielem	36.03	14.29	17	2017-06-13	Global sewage consortium	wastewater	wastewater metagenome	ERS2597467	ERX2697876	ERR2683262	Illumina	paired	Illumina NovaSeq 6000	Middle East & North Africa
MLT	DTU_2016_131_3_MG_MLT-63_2	2016_pil_mlt_01	Malta	MT	St. Venera	35.89	14.48	16	2016-01-02	Global sewage consortium	wastewater	wastewater metagenome	ERS2520990	ERX2624156	ERR2607500	Illumina	paired	Illumina HiSeq 3000	Middle East & North Africa
MLT	DTU_2016_130_2_MG_MLT-63_1	2016_pil_mlt_01	Malta	MT	St. Venera	35.89	14.48	16	2016-01-02	Global sewage consortium	wastewater	wastewater metagenome	ERS2520989	ERX2624155	ERR2607499	Illumina	paired	Illumina HiSeq 3000	Middle East & North Africa
MLT	DTU_2016_129_1_MG_MLT-63	2016_pil_mlt_01	Malta	MT	St. Venera	35.89	14.48	16	2016-01-02	Global sewage consortium	wastewater	wastewater metagenome	ERS2520991	ERX2624157	ERR2607501	Illumina	paired	Illumina HiSeq 3000	Middle East & North Africa
MLT	DTU_2018_835_1_MG_MT_MT_519	2018_nov_mlt_01	Malta	MT	St. Venera	35.89	14.48	18	2018-12-11	Global sewage consortium	wastewater	wastewater metagenome	ERS5184511	ERX4600217	ERR4678593	Illumina	paired	Illumina NovaSeq 6000	Middle East & North Africa
MLT	DTU_2017_385_1_MG_MT_MS	2017_jun_mlt_01	Malta	MT	Xghajra	35.89	14.55	17	2017-06-12	Global sewage consortium	wastewater	wastewater metagenome	ERS2597465	ERX2697874	ERR2683260	Illumina	paired	Illumina NovaSeq 6000	Middle East & North Africa
MYS	DTU_2018_1012_1_MG_MY1803_L61	2018_lon_mys_09	Malaysia	MY	Kuala Lumpur	3.15	101.69	18	2018-03-16	Global sewage consortium	wastewater	wastewater metagenome	--	--	--	Illumina	paired	Illumina NovaSeq 6000	East Asia & Pacific
MYS	DTU_2017_968_1_MG_MY1710_L11	2017_lon_mys_04	Malaysia	MY	Kuala Lumpur	3.15	101.69	17	2017-10-10	Global sewage consortium	wastewater	wastewater metagenome	--	--	--	Illumina	paired	Illumina NovaSeq 6000	East Asia & Pacific
MYS	DTU_2018_725_1_MG_MY_PB_422	2018_jun_mys_02	Malaysia	MY	Butterworth	5.39	100.37	18	2018-06-27	Global sewage consortium	wastewater	wastewater metagenome	ERS5186704	ERX4604296	ERR4682847	Illumina	paired	Illumina NovaSeq 6000	East Asia & Pacific
MYS	DTU_2017_967_1_MG_MY1709_L10	2017_lon_mys_03	Malaysia	MY	Kuala Lumpur	3.15	101.69	17	2017-09-12	Global sewage consortium	wastewater	wastewater metagenome	--	--	--	Illumina	paired	Illumina NovaSeq 6000	East Asia & Pacific
MYS	DTU_2018_824_1_MG_MY_KL_508	2018_nov_mys_02	Malaysia	MY	Kuala Lumpur	3.15	101.69	18	2018-12-07	Global sewage consortium	wastewater	wastewater metagenome	ERS5184500	ERX4600206	ERR4678582	Illumina	paired	Illumina NovaSeq 6000	East Asia & Pacific
MYS	DTU_2017_534_1_MG_MY_KL_230	2017_nov_mys_01	Malaysia	MY	Kuala Lumpur	3.15	101.69	17	2017-11-30	Global sewage consortium	wastewater	wastewater metagenome	ERS5186494	ERX4603823	ERR4682371	Illumina	paired	Illumina NovaSeq 6000	East Asia & Pacific
MYS	DTU_2017_325_1_MG_MY_IP	2017_jun_mys_05	Malaysia	MY	Ipoh	4.6	101.09	17	2017-08-12	Global sewage consortium	wastewater	wastewater metagenome	ERS2597399	ERX2697808	ERR2683194	Illumina	paired	Illumina NovaSeq 6000	East Asia & Pacific
MYS	DTU_2017_324_1_MG_MY_PG	2017_jun_mys_04	Malaysia	MY	George Town	5.41	100.33	17	2017-06-08	Global sewage consortium	wastewater	wastewater metagenome	ERS2597398	ERX2697807	ERR2683193	Illumina	paired	Illumina NovaSeq 6000	East Asia & Pacific
MYS	DTU_2017_617_1_MG_MY_AS_313	2017_nov_mys_04	Malaysia	MY	Alor Setar	6.12	100.37	17	2017-11-23	Global sewage consortium	wastewater	wastewater metagenome	ERS5186571	ERX4603900	ERR4682448	Illumina	paired	Illumina NovaSeq 6000	East Asia & Pacific
MYS	DTU_2017_535_1_MG_MY_KG_231	2017_nov_mys_02	Malaysia	MY	Klang	3.04	101.45	17	2017-11-30	Global sewage consortium	wastewater	wastewater metagenome	ERS5186495	ERX4603824	ERR4682372	Illumina	paired	Illumina NovaSeq 6000	East Asia & Pacific
MYS	DTU_2017_326_1_MG_MY_PB	2017_jun_mys_06	Malaysia	MY	Butterworth	5.39	100.37	17	2017-06-08	Global sewage consortium	wastewater	wastewater metagenome	ERS2597400	ERX2697809	ERR2683195	Illumina	paired	Illumina NovaSeq 6000	East Asia & Pacific
MYS	DTU_2017_536_1_MG_MY_IP_232	2017_nov_mys_03	Malaysia	MY	Ipoh	4.6	101.09	17	2017-11-29	Global sewage consortium	wastewater	wastewater metagenome	ERS5186496	ERX4603825	ERR4682373	Illumina	paired	Illumina NovaSeq 6000	East Asia & Pacific
MYS	DTU_2017_966_1_MG_MY1708_L9	2017_lon_mys_02	Malaysia	MY	Kuala Lumpur	3.15	101.69	17	2017-08-15	Global sewage consortium	wastewater	wastewater metagenome	--	--	--	Illumina	paired	Illumina NovaSeq 6000	East Asia & Pacific
MYS	DTU_2018_730_1_MG_MY_KG_427	2018_jun_mys_07	Malaysia	MY	Klang	3.04	101.45	18	2018-06-29	Global sewage consortium	wastewater	wastewater metagenome	ERS5186709	ERX4604301	ERR4682852	Illumina	paired	Illumina NovaSeq 6000	East Asia & Pacific
MYS	DTU_2018_928_1_MG_MY_SU_611	2018_nov_mys_05	Malaysia	MY	Sungai Petani	5.64	100.49	18	2018-12-14	Global sewage consortium	wastewater	wastewater metagenome	ERS5184597	ERX4600303	ERR4678679	Illumina	paired	Illumina NovaSeq 6000	East Asia & Pacific
MYS	DTU_2018_927_1_MG_MY_PG_610	2018_nov_mys_04	Malaysia	MY	Jelutong	5.39	100.31	18	2018-12-13	Global sewage consortium	wastewater	wastewater metagenome	ERS5184596	ERX4600302	ERR4678678	Illumina	paired	Illumina NovaSeq 6000	East Asia & Pacific
MYS	DTU_2016_248_1_MG_Reproduce_54_1	2016_pil_mys_02	Malaysia	MY	Kuala Lumpur	3.15	101.69	16	2016-02-05	Global sewage consortium	wastewater	wastewater metagenome	--	--	--	Illumina	paired	Illumina HiSeq 3000	East Asia & Pacific
MYS	DTU_2018_926_1_MG_MY_PB_609	2018_nov_mys_03	Malaysia	MY	Butterworth	5.39	100.37	18	2018-12-13	Global sewage consortium	wastewater	wastewater metagenome	ERS5184595	ERX4600301	ERR4678677	Illumina	paired	Illumina NovaSeq 6000	East Asia & Pacific
MYS	DTU_2016_136_5_MG_MYS-54_4	2016_pil_mys_01	Malaysia	MY	Kuala Lumpur	3.15	101.69	16	2016-04-02	Global sewage consortium	wastewater	wastewater metagenome	ERS2520995	ERX2624161	ERR2607505	Illumina	paired	Illumina HiSeq 3000	East Asia & Pacific
MYS	DTU_2018_1013_1_MG_MY1804_L62	2018_lon_mys_10	Malaysia	MY	Kuala Lumpur	3.15	101.69	18	2018-04-12	Global sewage consortium	wastewater	wastewater metagenome	--	--	--	Illumina	paired	Illumina NovaSeq 6000	East Asia & Pacific
MYS	DTU_2017_323_1_MG_MY_AS	2017_jun_mys_03	Malaysia	MY	Sungai Petani	5.64	100.49	17	2017-06-12	Global sewage consortium	wastewater	wastewater metagenome	ERS2597396	ERX2697805	ERR2683191	Illumina	paired	Illumina NovaSeq 6000	East Asia & Pacific
MYS	DTU_2017_315_1_MG_MY_KL	2017_jun_mys_01	Malaysia	MY	Kuala Lumpur	3.15	101.69	17	2017-06-15	Global sewage consortium	wastewater	wastewater metagenome	ERS2597339	ERX2697748	ERR2683134	Illumina	paired	Illumina NovaSeq 6000	East Asia & Pacific
MYS	DTU_2017_965_1_MG_MY1707_L8	2017_lon_mys_01	Malaysia	MY	Kuala Lumpur	3.15	101.69	17	2017-07-18	Global sewage consortium	wastewater	wastewater metagenome	--	--	--	Illumina	paired	Illumina NovaSeq 6000	East Asia & Pacific
MYS	DTU_2017_619_1_MG_MY_PB_315	2017_nov_mys_06	Malaysia	MY	Butterworth	5.39	100.37	17	2017-11-23	Global sewage consortium	wastewater	wastewater metagenome	ERS5186573	ERX4603902	ERR4682450	Illumina	paired	Illumina NovaSeq 6000	East Asia & Pacific
MYS	DTU_2018_661_1_MG_MY_KL_349	2018_jun_mys_01	Malaysia	MY	Kuala Lumpur	3.15	101.69	18	2018-05-31	Global sewage consortium	wastewater	wastewater metagenome	ERS5186644	ERX4604236	ERR4682787	Illumina	paired	Illumina NovaSeq 6000	East Asia & Pacific
MYS	DTU_2018_729_1_MG_MY_IH_426	2018_jun_mys_06	Malaysia	MY	Ipoh	4.6	101.09	18	2018-06-28	Global sewage consortium	wastewater	wastewater metagenome	ERS5186708	ERX4604300	ERR4682851	Illumina	paired	Illumina NovaSeq 6000	East Asia & Pacific
MYS	DTU_2016_135_4_MG_MYS-54_3	2016_pil_mys_01	Malaysia	MY	Kuala Lumpur	3.15	101.69	16	2016-04-02	Global sewage consortium	wastewater	wastewater metagenome	ERS2520994	ERX2624160	ERR2607504	Illumina	paired	Illumina HiSeq 3000	East Asia & Pacific
MYS	DTU_2018_987_1_MG_MY1801_L32	2018_lon_mys_07	Malaysia	MY	Kuala Lumpur	3.15	101.69	18	2018-01-04	Global sewage consortium	wastewater	wastewater metagenome	--	--	--	Illumina	paired	Illumina NovaSeq 6000	East Asia & Pacific
MYS	DTU_2018_726_1_MG_MY_PG_423	2018_jun_mys_03	Malaysia	MY	Jelutong	5.39	100.31	18	2018-06-27	Global sewage consortium	wastewater	wastewater metagenome	ERS5186705	ERX4604297	ERR4682848	Illumina	paired	Illumina NovaSeq 6000	East Asia & Pacific
MYS	DTU_2017_989_1_MG_MY1711_L34	2017_lon_mys_06	Malaysia	MY	Kuala Lumpur	3.15	101.69	17	2017-11-04	Global sewage consortium	wastewater	wastewater metagenome	--	--	--	Illumina	paired	Illumina NovaSeq 6000	East Asia & Pacific
MYS	DTU_2017_986_1_MG_MY1712_L31	2017_lon_mys_05	Malaysia	MY	Kuala Lumpur	3.15	101.69	17	2017-12-05	Global sewage consortium	wastewater	wastewater metagenome	--	--	--	Illumina	paired	Illumina NovaSeq 6000	East Asia & Pacific
MYS	DTU_2017_316_1_MG_MY_KG	2017_jun_mys_02	Malaysia	MY	Klang	3.04	101.45	17	2017-06-16	Global sewage consortium	wastewater	wastewater metagenome	ERS2597350	ERX2697759	ERR2683145	Illumina	paired	Illumina NovaSeq 6000	East Asia & Pacific
MYS	DTU_2016_134_3_MG_MYS-54_2	2016_pil_mys_01	Malaysia	MY	Kuala Lumpur	3.15	101.69	16	2016-04-02	Global sewage consortium	wastewater	wastewater metagenome	ERS2520993	ERX2624159	ERR2607503	Illumina	paired	Illumina HiSeq 3000	East Asia & Pacific
MYS	DTU_2016_132_1_MG_MYS-54	2016_pil_mys_01	Malaysia	MY	Kuala Lumpur	3.15	101.69	16	2016-04-02	Global sewage consortium	wastewater	wastewater metagenome	ERS2520996	ERX2624162	ERR2607506	Illumina	paired	Illumina HiSeq 3000	East Asia & Pacific
MYS	DTU_2018_1014_1_MG_MY1805_L63	2018_lon_mys_11	Malaysia	MY	Kuala Lumpur	3.15	101.69	18	2018-05-08	Global sewage consortium	wastewater	wastewater metagenome	--	--	--	Illumina	paired	Illumina NovaSeq 6000	East Asia & Pacific
MYS	DTU_2018_823_1_MG_MY_KG_507	2018_nov_mys_01	Malaysia	MY	Klang	3.04	101.45	18	2018-12-07	Global sewage consortium	wastewater	wastewater metagenome	ERS5184499	ERX4600205	ERR4678581	Illumina	paired	Illumina NovaSeq 6000	East Asia & Pacific
MYS	DTU_2018_988_1_MG_MY1802_L33	2018_lon_mys_08	Malaysia	MY	Kuala Lumpur	3.15	101.69	18	2018-01-06	Global sewage consortium	wastewater	wastewater metagenome	--	--	--	Illumina	paired	Illumina NovaSeq 6000	East Asia & Pacific
MYS	DTU_2017_618_1_MG_MY_PG_314	2017_nov_mys_05	Malaysia	MY	Jelutong	5.39	100.31	17	2017-11-23	Global sewage consortium	wastewater	wastewater metagenome	ERS5186572	ERX4603901	ERR4682449	Illumina	paired	Illumina NovaSeq 6000	East Asia & Pacific
MYS	DTU_2016_249_2_MG_Reproduce_54_3	2016_pil_mys_03	Malaysia	MY	Kuala Lumpur	3.15	101.69	16	2016-02-05	Global sewage consortium	wastewater	wastewater metagenome	--	--	--	Illumina	paired	Illumina HiSeq 3000	East Asia & Pacific
MYS	DTU_2016_133_2_MG_MYS-54_1	2016_pil_mys_01	Malaysia	MY	Kuala Lumpur	3.15	101.69	16	2016-04-02	Global sewage consortium	wastewater	wastewater metagenome	ERS2520992	ERX2624158	ERR2607502	Illumina	paired	Illumina HiSeq 3000	East Asia & Pacific
MYS	DTU_2018_728_1_MG_MY_KL_1_425	2018_jun_mys_05	Malaysia	MY	Kuala Lumpur	3.15	101.69	18	2018-06-29	Global sewage consortium	wastewater	wastewater metagenome	ERS5186707	ERX4604299	ERR4682850	Illumina	paired	Illumina NovaSeq 6000	East Asia & Pacific
MYS	DTU_2018_727_1_MG_MY_SU_424	2018_jun_mys_04	Malaysia	MY	Sungai Petani	5.64	100.49	18	2018-07-06	Global sewage consortium	wastewater	wastewater metagenome	ERS5186706	ERX4604298	ERR4682849	Illumina	paired	Illumina NovaSeq 6000	East Asia & Pacific
NGA	DTU_2017_417_3_MG_NG_ZA_c	2017_jun_nga_07	Nigeria	NG	Zaria	11.11	7.72	17	2017-06-12	Global sewage consortium	wastewater	wastewater metagenome	ERS2597332	ERX2697741	ERR2683127	Illumina	paired	Illumina NovaSeq 6000	Sub-Saharan Africa
NGA	DTU_2017_418_1_MG_NG_IB_a	2017_jun_nga_08	Nigeria	NG	Ibadan	7.38	3.9	17	2017-07-18	Global sewage consortium	wastewater	wastewater metagenome	ERS2597333	ERX2697742	ERR2683128	Illumina	paired	Illumina NovaSeq 6000	Sub-Saharan Africa
NGA	DTU_2018_724_1_MG_NG_LA_421	2018_jun_nga_01	Nigeria	NG	Lagos	6.46	3.39	18	2018-07-03	Global sewage consortium	wastewater	wastewater metagenome	ERS5186703	ERX4604295	ERR4682846	Illumina	paired	Illumina NovaSeq 6000	Sub-Saharan Africa
NGA	DTU_2017_415_1_MG_NG_ZA_a	2017_jun_nga_05	Nigeria	NG	Zaria	11.11	7.72	17	2017-06-12	Global sewage consortium	wastewater	wastewater metagenome	ERS2597330	ERX2697739	ERR2683125	Illumina	paired	Illumina NovaSeq 6000	Sub-Saharan Africa
NGA	DTU_2017_419_2_MG_NG_IB_b	2017_jun_nga_09	Nigeria	NG	Ibadan	7.38	3.9	17	2017-07-18	Global sewage consortium	wastewater	wastewater metagenome	ERS2597334	ERX2697743	ERR2683129	Illumina	paired	Illumina NovaSeq 6000	Sub-Saharan Africa
NGA	DTU_2018_947_1_MG_NG_IB_629	2018_nov_nga_04	Nigeria	NG	Ibadan	7.38	3.9	18	2017-12-27	Global sewage consortium	wastewater	wastewater metagenome	ERS5184614	ERX4600320	ERR4678696	Illumina	paired	Illumina NovaSeq 6000	Sub-Saharan Africa
NGA	DTU_2017_414_4_MG_NG_IL_d	2017_jun_nga_04	Nigeria	NG	Ilorin	8.5	4.55	17	2017-06-18	Global sewage consortium	wastewater	wastewater metagenome	ERS2597329	ERX2697738	ERR2683124	Illumina	paired	Illumina NovaSeq 6000	Sub-Saharan Africa
NGA	DTU_2017_416_2_MG_NG_ZA_b	2017_jun_nga_06	Nigeria	NG	Zaria	11.11	7.72	17	2017-06-12	Global sewage consortium	wastewater	wastewater metagenome	ERS2597331	ERX2697740	ERR2683126	Illumina	paired	Illumina NovaSeq 6000	Sub-Saharan Africa
NGA	DTU_2017_412_2_MG_NG_IL_b	2017_jun_nga_03	Nigeria	NG	Ilorin	8.5	4.55	17	2017-06-18	Global sewage consortium	wastewater	wastewater metagenome	ERS2597327	ERX2697736	ERR2683122	Illumina	paired	Illumina NovaSeq 6000	Sub-Saharan Africa
NGA	DTU_2018_908_1_MG_NG_LA_593	2018_nov_nga_03	Nigeria	NG	Lagos	6.46	3.39	18	2018-12-18	Global sewage consortium	wastewater	wastewater metagenome	ERS5184581	ERX4600287	ERR4678663	Illumina	paired	Illumina NovaSeq 6000	Sub-Saharan Africa
NGA	DTU_2018_890_1_MG_NG_IL_2_577	2018_nov_nga_02	Nigeria	NG	Ilorin	8.5	4.55	18	2018	Global sewage consortium	wastewater	wastewater metagenome	ERS5184563	ERX4600269	ERR4678645	Illumina	paired	Illumina NovaSeq 6000	Sub-Saharan Africa
NGA	DTU_2017_411_1_MG_NG_IL_a	2017_jun_nga_02	Nigeria	NG	Ilorin	8.5	4.55	17	2017-06-15	Global sewage consortium	wastewater	wastewater metagenome	ERS2597326	ERX2697735	ERR2683121	Illumina	paired	Illumina NovaSeq 6000	Sub-Saharan Africa
NGA	DTU_2018_886_1_MG_NG_IL_573	2018_nov_nga_01	Nigeria	NG	Ilorin	8.5	4.55	18	2018-11-29	Global sewage consortium	wastewater	wastewater metagenome	ERS5184559	ERX4600265	ERR4678641	Illumina	paired	Illumina NovaSeq 6000	Sub-Saharan Africa
NGA	DTU_2017_394_1_MG_NG_LA	2017_jun_nga_01	Nigeria	NG	Lagos	6.46	3.39	17	2017-06-07	Global sewage consortium	wastewater	wastewater metagenome	ERS2597475	ERX2697884	ERR2683270	Illumina	paired	Illumina NovaSeq 6000	Sub-Saharan Africa
NGA	DTU_2016_137_1_MG_NGA-50	2016_pil_nga_01	Nigeria	NG	Lagos	6.46	3.39	16	2016-02-02	Global sewage consortium	wastewater	wastewater metagenome	ERS2520999	ERX2624165	ERR2607509	Illumina	paired	Illumina HiSeq 3000	Sub-Saharan Africa
NGA	DTU_2017_626_1_MG_NG_IL_322	2017_nov_nga_02	Nigeria	NG	Ilorin	8.5	4.55	17	2018-01-10	Global sewage consortium	wastewater	wastewater metagenome	ERS5186580	ERX4603909	ERR4682457	Illumina	paired	Illumina NovaSeq 6000	Sub-Saharan Africa
NGA	DTU_2016_139_3_MG_NGA-50_2	2016_pil_nga_01	Nigeria	NG	Lagos	6.46	3.39	16	2016-02-02	Global sewage consortium	wastewater	wastewater metagenome	ERS2520998	ERX2624164	ERR2607508	Illumina	paired	Illumina HiSeq 3000	Sub-Saharan Africa
NGA	DTU_2017_560_1_MG_NG_LA_256	2017_nov_nga_01	Nigeria	NG	Lagos	6.46	3.39	17	2017-12-06	Global sewage consortium	wastewater	wastewater metagenome	ERS5186519	ERX4603848	ERR4682396	Illumina	paired	Illumina NovaSeq 6000	Sub-Saharan Africa
NGA	DTU_2018_948_2_MG_NG_IB_629_re_1	2018_nov_nga_04	Nigeria	NG	Ibadan	7.38	3.9	18	2017-12-27	Global sewage consortium	wastewater	wastewater metagenome	ERS5184615	ERX4600321	ERR4678697	Illumina	paired	Illumina NovaSeq 6000	Sub-Saharan Africa
NGA	DTU_2016_138_2_MG_NGA-50_1	2016_pil_nga_01	Nigeria	NG	Lagos	6.46	3.39	16	2016-02-02	Global sewage consortium	wastewater	wastewater metagenome	ERS2520997	ERX2624163	ERR2607507	Illumina	paired	Illumina HiSeq 3000	Sub-Saharan Africa
NLD	DTU_2016_142_3_MG_NLD-43_2	2016_pil_nld_01	Netherlands	NL	Bilthoven	52.15	5.21	16	2016-01-27	Global sewage consortium	wastewater	wastewater metagenome	ERS2521001	ERX2624167	ERR2607511	Illumina	paired	Illumina HiSeq 3000	Europe & Central Asia
NLD	DTU_2016_143_4_MG_NLD-43_3	2016_pil_nld_01	Netherlands	NL	Bilthoven	52.15	5.21	16	2016-01-27	Global sewage consortium	wastewater	wastewater metagenome	ERS2521002	ERX2624168	ERR2607512	Illumina	paired	Illumina HiSeq 3000	Europe & Central Asia
NLD	DTU_2017_329_1_MG_NL_AM	2017_jun_nld_01	Netherlands	NL	Amsterdam	52.37	4.89	17	2017-06-12	Global sewage consortium	wastewater	wastewater metagenome	ERS2597403	ERX2697812	ERR2683198	Illumina	paired	Illumina NovaSeq 6000	Europe & Central Asia
NLD	DTU_2016_141_2_MG_NLD-43_1	2016_pil_nld_01	Netherlands	NL	Bilthoven	52.15	5.21	16	2016-01-27	Global sewage consortium	wastewater	wastewater metagenome	ERS2521000	ERX2624166	ERR2607510	Illumina	paired	Illumina HiSeq 3000	Europe & Central Asia
NLD	DTU_2018_701_1_MG_NL_UT_389	2018_jun_nld_02	Netherlands	NL	Utrecht	52.09	5.11	18	2018-07-02	Global sewage consortium	wastewater	wastewater metagenome	ERS5186681	ERX4604273	ERR4682824	Illumina	paired	Illumina NovaSeq 6000	Europe & Central Asia
NLD	DTU_2017_330_1_MG_NL_UT	2017_jun_nld_02	Netherlands	NL	Utrecht	52.09	5.11	17	2017-06-12	Global sewage consortium	wastewater	wastewater metagenome	ERS2597404	ERX2697813	ERR2683199	Illumina	paired	Illumina NovaSeq 6000	Europe & Central Asia
NLD	DTU_2018_691_1_MG_NL_AM_380	2018_jun_nld_01	Netherlands	NL	Amsterdam	52.37	4.89	18	2018-07-04	Global sewage consortium	wastewater	wastewater metagenome	ERS5186671	ERX4604263	ERR4682814	Illumina	paired	Illumina NovaSeq 6000	Europe & Central Asia
NLD	DTU_2016_144_5_MG_NLD-43_4	2016_pil_nld_01	Netherlands	NL	Bilthoven	52.15	5.21	16	2016-01-27	Global sewage consortium	wastewater	wastewater metagenome	ERS2521003	ERX2624169	ERR2607513	Illumina	paired	Illumina HiSeq 3000	Europe & Central Asia
NLD	DTU_2017_637_1_MG_NL_UT_333	2017_nov_nld_01	Netherlands	NL	Utrecht	52.09	5.11	17	2017-11-23	Global sewage consortium	wastewater	wastewater metagenome	ERS5186591	ERX4603920	ERR4682468	Illumina	paired	Illumina NovaSeq 6000	Europe & Central Asia
NLD	DTU_2016_140_1_MG_NLD-43	2016_pil_nld_01	Netherlands	NL	Bilthoven	52.15	5.21	16	2016-01-27	Global sewage consortium	wastewater	wastewater metagenome	ERS2521004	ERX2624170	ERR2607514	Illumina	paired	Illumina HiSeq 3000	Europe & Central Asia
NLD	DTU_2018_925_1_MG_NL_UT_608	2018_nov_nld_01	Netherlands	NL	Utrecht	52.09	5.11	18	2018-12-20	Global sewage consortium	wastewater	wastewater metagenome	ERS5184594	ERX4600300	ERR4678676	Illumina	paired	Illumina NovaSeq 6000	Europe & Central Asia
NOR	DTU_2016_147_3_MG_NOR-34_2	2016_pil_nor_01	Norway	NO	Oslo	59.91	10.74	16	2016-03-02	Global sewage consortium	wastewater	wastewater metagenome	ERS2521006	ERX2624172	ERR2607516	Illumina	paired	Illumina HiSeq 3000	Europe & Central Asia
NOR	DTU_2016_146_2_MG_NOR-34_1	2016_pil_nor_01	Norway	NO	Oslo	59.91	10.74	16	2016-03-02	Global sewage consortium	wastewater	wastewater metagenome	ERS2521005	ERX2624171	ERR2607515	Illumina	paired	Illumina HiSeq 3000	Europe & Central Asia
NOR	DTU_2018_742_1_MG_NO_OS_439	2018_jun_nor_01	Norway	NO	Oslo	59.91	10.74	18	2018-07-18	Global sewage consortium	wastewater	wastewater metagenome	ERS5186721	ERX4604313	ERR4682864	Illumina	paired	Illumina NovaSeq 6000	Europe & Central Asia
NOR	DTU_2017_449_1_MG_NO_OS	2017_jun_nor_01	Norway	NO	Oslo	59.91	10.74	17	2017-06-07	Global sewage consortium	wastewater	wastewater metagenome	ERS2597367	ERX2697776	ERR2683162	Illumina	paired	Illumina NovaSeq 6000	Europe & Central Asia
NOR	DTU_2017_533_1_MG_NO_OS_229	2017_nov_nor_01	Norway	NO	Oslo	59.91	10.74	17	2017-11-23	Global sewage consortium	wastewater	wastewater metagenome	ERS5186493	ERX4603822	ERR4682370	Illumina	paired	Illumina NovaSeq 6000	Europe & Central Asia
NOR	DTU_2016_145_1_MG_NOR-34	2016_pil_nor_01	Norway	NO	Oslo	59.91	10.74	16	2016-03-02	Global sewage consortium	wastewater	wastewater metagenome	ERS2521007	ERX2624173	ERR2607517	Illumina	paired	Illumina HiSeq 3000	Europe & Central Asia
NPL	DTU_2017_456_1_MG_NP_KA	2017_jun_npl_01	Nepal	NP	Kathmandu	27.71	85.32	17	2017-06	Global sewage consortium	wastewater	wastewater metagenome	ERS2597375	ERX2697784	ERR2683170	Illumina	paired	Illumina NovaSeq 6000	South Asia
NPL	DTU_2017_591_1_MG_NP_KA_287	2017_nov_npl_01	Nepal	NP	Kathmandu	27.71	85.32	17	2018-01-03	Global sewage consortium	wastewater	wastewater metagenome	ERS5186545	ERX4603874	ERR4682422	Illumina	paired	Illumina NovaSeq 6000	South Asia
NPL	DTU_2018_907_1_MG_NP_KA_592	2018_nov_npl_01	Nepal	NP	Kathmandu	27.71	85.32	18	2019-02-13	Global sewage consortium	wastewater	wastewater metagenome	ERS5184580	ERX4600286	ERR4678662	Illumina	paired	Illumina NovaSeq 6000	South Asia
NPL	DTU_2017_592_1_MG_NP_BH_288	2017_nov_npl_02	Nepal	NP	Bhaktapur	27.67	85.43	17	2018-01-03	Global sewage consortium	wastewater	wastewater metagenome	ERS5186546	ERX4603875	ERR4682423	Illumina	paired	Illumina NovaSeq 6000	South Asia
NPL	DTU_2016_148_1_MG_NPL-33	2016_pil_npl_01	Nepal	NP	Kathmandu	27.71	85.32	16	2016-01-30	Global sewage consortium	wastewater	wastewater metagenome	ERS2521008	ERX2624174	ERR2607518	Illumina	paired	Illumina HiSeq 3000	South Asia
NZL	DTU_2017_343_1_MG_NZ_CH	2017_jun_nzl_01	New Zealand	NZ	Christchurch	-43.53	172.64	17	2017-06-06	Global sewage consortium	wastewater	wastewater metagenome	ERS2597418	ERX2697827	ERR2683213	Illumina	paired	Illumina NovaSeq 6000	East Asia & Pacific
NZL	DTU_2018_784_1_MG_NZ_DU_481	2018_jun_nzl_02	New Zealand	NZ	Dunedin	-45.87	170.5	18	2018-10-16	Global sewage consortium	wastewater	wastewater metagenome	ERS5186756	ERX4604348	ERR4682899	Illumina	paired	Illumina NovaSeq 6000	East Asia & Pacific
NZL	DTU_2017_613_1_MG_NZ_CH_309	2017_nov_nzl_01	New Zealand	NZ	Christchurch	-43.53	172.64	17	2017-11-21	Global sewage consortium	wastewater	wastewater metagenome	ERS5186567	ERX4603896	ERR4682444	Illumina	paired	Illumina NovaSeq 6000	East Asia & Pacific
NZL	DTU_2018_915_1_MG_NZ_CH_600	2018_nov_nzl_01	New Zealand	NZ	Christchurch	-43.53	172.64	18	2018-12-17	Global sewage consortium	wastewater	wastewater metagenome	ERS5184588	ERX4600294	ERR4678670	Illumina	paired	Illumina NovaSeq 6000	East Asia & Pacific
NZL	DTU_2016_149_1_MG_NZL-56	2016_pil_nzl_01	New Zealand	NZ	Dunedin	-45.87	170.5	16	2016-01-27	Global sewage consortium	wastewater	wastewater metagenome	ERS2521009	ERX2624175	ERR2607519	Illumina	paired	Illumina HiSeq 3000	East Asia & Pacific
NZL	DTU_2018_731_1_MG_NZ_CH_428	2018_jun_nzl_01	New Zealand	NZ	Christchurch	-43.53	172.64	18	2018-07-04	Global sewage consortium	wastewater	wastewater metagenome	ERS5186710	ERX4604302	ERR4682853	Illumina	paired	Illumina NovaSeq 6000	East Asia & Pacific
PAK	DTU_2017_450_1_MG_PK_KA	2017_jun_pak_01	Pakistan	PK	Karachi	25.14	67.18	17	2017-06-12	Global sewage consortium	wastewater	wastewater metagenome	ERS2597368	ERX2697777	ERR2683163	Illumina	paired	Illumina NovaSeq 6000	South Asia
PAK	DTU_2016_150_1_MG_PAK-7	2016_pil_pak_01	Pakistan	PK	Karachi	25.14	67.18	16	2016-01-27	Global sewage consortium	wastewater	wastewater metagenome	ERS2521010	ERX2624176	ERR2607520	Illumina	paired	Illumina HiSeq 3000	South Asia
PAK	DTU_2018_869_1_MG_PK_FA_553	2018_nov_pak_01	Pakistan	PK	Faisalabad	31.42	73.09	18	2018-12-27	Global sewage consortium	wastewater	wastewater metagenome	ERS5184542	ERX4600248	ERR4678624	Illumina	paired	Illumina NovaSeq 6000	South Asia
PAK	DTU_2017_553_1_MG_PK_KA_249	2017_nov_pak_01	Pakistan	PK	Karachi	25.14	67.18	17	2017-11-27	Global sewage consortium	wastewater	wastewater metagenome	ERS5186513	ERX4603842	ERR4682390	Illumina	paired	Illumina NovaSeq 6000	South Asia
PAK	DTU_2017_451_1_MG_PK_HY	2017_jun_pak_02	Pakistan	PK	Hyderabad	25.38	68.38	17	2017-06-15	Global sewage consortium	wastewater	wastewater metagenome	ERS2597369	ERX2697778	ERR2683164	Illumina	paired	Illumina NovaSeq 6000	South Asia
PAK	DTU_2018_775_1_MG_PK_KA_472	2018_jun_pak_02	Pakistan	PK	Karachi	25.14	67.18	18	2018-06-20	Global sewage consortium	wastewater	wastewater metagenome	ERS5186747	ERX4604339	ERR4682890	Illumina	paired	Illumina NovaSeq 6000	South Asia
PAK	DTU_2017_961_1_MG_PK1708_L3	2017_lon_pak_01	Pakistan	PK	Karachi	25.14	67.18	17	2017-08-18	Global sewage consortium	wastewater	wastewater metagenome	--	--	--	Illumina	paired	Illumina NovaSeq 6000	South Asia
PAK	DTU_2017_962_1_MG_PK1707_L4	2017_lon_pak_02	Pakistan	PK	Karachi	25.14	67.18	17	2017-07-19	Global sewage consortium	wastewater	wastewater metagenome	--	--	--	Illumina	paired	Illumina NovaSeq 6000	South Asia
PAK	DTU_2017_973_1_MG_PK1709_L18	2017_lon_pak_03	Pakistan	PK	Karachi	25.14	67.18	17	2017-09-28	Global sewage consortium	wastewater	wastewater metagenome	--	--	--	Illumina	paired	Illumina NovaSeq 6000	South Asia
PAK	DTU_2018_687_1_MG_PK_FA_375	2018_jun_pak_01	Pakistan	PK	Faisalabad	31.42	73.09	18	2018-06-21	Global sewage consortium	wastewater	wastewater metagenome	ERS5186667	ERX4604259	ERR4682810	Illumina	paired	Illumina NovaSeq 6000	South Asia
PAK	DTU_2017_974_1_MG_PK1710_L19	2017_lon_pak_04	Pakistan	PK	Karachi	25.14	67.18	17	2017-10-30	Global sewage consortium	wastewater	wastewater metagenome	--	--	--	Illumina	paired	Illumina NovaSeq 6000	South Asia
PAK	DTU_2018_944_1_MG_PK_HY_a_626	2018_nov_pak_02	Pakistan	PK	Hyderabad	25.38	68.38	18	2017-06-15	Global sewage consortium	wastewater	wastewater metagenome	ERS5184611	ERX4600317	ERR4678693	Illumina	paired	Illumina NovaSeq 6000	South Asia
PER	DTU_2016_151_1_MG_PER-35	2016_pil_per_01	Peru	PE	Lima	-12.06	-77.04	16	2016-04-02	Global sewage consortium	wastewater	wastewater metagenome	ERS2521011	ERX2624177	ERR2607521	Illumina	paired	Illumina HiSeq 3000	Latin America & Caribbean
PER	DTU_2017_401_1_MG_PE_PI	2017_jun_per_01	Peru	PE	Piura City	-5.17	-80.33	17	2017-06-07	Global sewage consortium	wastewater	wastewater metagenome	ERS2597482	ERX2697891	ERR2683277	Illumina	paired	Illumina NovaSeq 6000	Latin America & Caribbean
POL	DTU_2016_154_3_MG_POL-36_2	2016_pil_pol_01	Poland	PL	Pulawy	51.42	21.97	16	2016-02-02	Global sewage consortium	wastewater	wastewater metagenome	ERS2521013	ERX2624179	ERR2607523	Illumina	paired	Illumina HiSeq 3000	Europe & Central Asia
POL	DTU_2018_932_2_MG_PL_PL_614_re_1	2018_nov_pol_01	Poland	PL	Pulawy	51.42	21.97	18	2018-12-13	Global sewage consortium	wastewater	wastewater metagenome	ERS5184601	ERX4600307	ERR4678683	Illumina	paired	Illumina NovaSeq 6000	Europe & Central Asia
POL	DTU_2018_931_1_MG_PL_PL_614	2018_nov_pol_01	Poland	PL	Pulawy	51.42	21.97	18	2018-12-13	Global sewage consortium	wastewater	wastewater metagenome	ERS5184600	ERX4600306	ERR4678682	Illumina	paired	Illumina NovaSeq 6000	Europe & Central Asia
POL	DTU_2018_700_1_MG_PL_PL_389	2018_jun_pol_01	Poland	PL	Pulawy	51.42	21.97	18	2018-07-09	Global sewage consortium	wastewater	wastewater metagenome	ERS5186680	ERX4604272	ERR4682823	Illumina	paired	Illumina NovaSeq 6000	Europe & Central Asia
POL	DTU_2016_153_2_MG_POL-36_1	2016_pil_pol_01	Poland	PL	Pulawy	51.42	21.97	16	2016-02-02	Global sewage consortium	wastewater	wastewater metagenome	ERS2521012	ERX2624178	ERR2607522	Illumina	paired	Illumina HiSeq 3000	Europe & Central Asia
POL	DTU_2017_559_1_MG_PL_PL_255	2017_nov_pol_01	Poland	PL	Pulawy	51.42	21.97	17	2017-11-28	Global sewage consortium	wastewater	wastewater metagenome	ERS5186518	ERX4603847	ERR4682395	Illumina	paired	Illumina NovaSeq 6000	Europe & Central Asia
POL	DTU_2017_410_1_MG_PL_PL	2017_jun_pol_01	Poland	PL	Pulawy	51.42	21.97	17	2017-06-05	Global sewage consortium	wastewater	wastewater metagenome	ERS2597325	ERX2697734	ERR2683120	Illumina	paired	Illumina NovaSeq 6000	Europe & Central Asia
POL	DTU_2016_152_1_MG_POL-36	2016_pil_pol_01	Poland	PL	Pulawy	51.42	21.97	16	2016-02-02	Global sewage consortium	wastewater	wastewater metagenome	ERS2521014	ERX2624180	ERR2607524	Illumina	paired	Illumina HiSeq 3000	Europe & Central Asia
SEN	DTU_2018_891_1_MG_SN_DA_578	2018_nov_sen_01	Senegal	SN	Dakar	14.69	-17.45	18	2019-01-17	Global sewage consortium	wastewater	wastewater metagenome	ERS5184564	ERX4600270	ERR4678646	Illumina	paired	Illumina NovaSeq 6000	Sub-Saharan Africa
SEN	DTU_2017_630_1_MG_SN_DA_326	2017_nov_sen_01	Senegal	SN	Dakar	14.69	-17.45	17	2018-03-08	Global sewage consortium	wastewater	wastewater metagenome	ERS5186584	ERX4603913	ERR4682461	Illumina	paired	Illumina NovaSeq 6000	Sub-Saharan Africa
SEN	DTU_2016_155_1_MG_SEN-8	2016_pil_sen_01	Senegal	SN	Dakar	14.69	-17.45	16	2016-02-02	Global sewage consortium	wastewater	wastewater metagenome	ERS2521015	ERX2624181	ERR2607525	Illumina	paired	Illumina HiSeq 3000	Sub-Saharan Africa
SEN	DTU_2018_782_1_MG_SN_DA_479	2018_jun_sen_01	Senegal	SN	Dakar	14.69	-17.45	18	2018	Global sewage consortium	wastewater	wastewater metagenome	ERS5186754	ERX4604346	ERR4682897	Illumina	paired	Illumina NovaSeq 6000	Sub-Saharan Africa
SEN	DTU_2017_355_1_MG_SN_DA	2017_jun_sen_01	Senegal	SN	Dakar	14.69	-17.45	17	2017-06-15	Global sewage consortium	wastewater	wastewater metagenome	ERS2597432	ERX2697841	ERR2683227	Illumina	paired	Illumina NovaSeq 6000	Sub-Saharan Africa
SGP	DTU_2016_158_3_MG_SGP-52_2	2016_pil_sgp_01	Singapore	SG	Singapore	1.36	103.82	16	2016-03-02	Global sewage consortium	wastewater	wastewater metagenome	ERS2521017	ERX2624183	ERR2607527	Illumina	paired	Illumina HiSeq 3000	East Asia & Pacific
SGP	DTU_2018_767_1_MG_SG_JU_464	2018_jun_sgp_02	Singapore	SG	Jurong	1.26	103.67	18	2018-06-20	Global sewage consortium	wastewater	wastewater metagenome	ERS5186743	ERX4604335	ERR4682886	Illumina	paired	Illumina NovaSeq 6000	East Asia & Pacific
SGP	DTU_2016_156_1_MG_SGP-52	2016_pil_sgp_01	Singapore	SG	Singapore	1.36	103.82	16	2016-03-02	Global sewage consortium	wastewater	wastewater metagenome	ERS2521018	ERX2624184	ERR2607528	Illumina	paired	Illumina HiSeq 3000	East Asia & Pacific
SGP	DTU_2018_911_1_MG_SG_JU_596	2018_nov_sgp_01	Singapore	SG	Jurong	1.26	103.67	18	2019-01-16	Global sewage consortium	wastewater	wastewater metagenome	ERS5184584	ERX4600290	ERR4678666	Illumina	paired	Illumina NovaSeq 6000	East Asia & Pacific
SGP	DTU_2016_157_2_MG_SGP-52_1	2016_pil_sgp_01	Singapore	SG	Singapore	1.36	103.82	16	2016-03-02	Global sewage consortium	wastewater	wastewater metagenome	ERS2521016	ERX2624182	ERR2607526	Illumina	paired	Illumina HiSeq 3000	East Asia & Pacific
SGP	DTU_2017_454_1_MG_SG_JU	2017_jun_sgp_01	Singapore	SG	Singapore	1.36	103.82	17	2017-06-14	Global sewage consortium	wastewater	wastewater metagenome	ERS2597373	ERX2697782	ERR2683168	Illumina	paired	Illumina NovaSeq 6000	East Asia & Pacific
SGP	DTU_2018_646_1_MG_SG_JU_334	2018_jun_sgp_01	Singapore	SG	Jurong	1.26	103.67	18	2017-11-22	Global sewage consortium	wastewater	wastewater metagenome	ERS5186629	ERX4604221	ERR4682772	Illumina	paired	Illumina NovaSeq 6000	East Asia & Pacific
SRB	DTU_2016_161_3_MG_SRB-37_2	2016_pil_srb_01	Serbia	RS	Belgrade	44.82	20.46	16	2016-01-27	Global sewage consortium	wastewater	wastewater metagenome	ERS2521020	ERX2624186	ERR2607530	Illumina	paired	Illumina HiSeq 3000	Europe & Central Asia
SRB	DTU_2016_160_2_MG_SRB-37_1	2016_pil_srb_01	Serbia	RS	Belgrade	44.82	20.46	16	2016-01-27	Global sewage consortium	wastewater	wastewater metagenome	ERS2521019	ERX2624185	ERR2607529	Illumina	paired	Illumina HiSeq 3000	Europe & Central Asia
SRB	DTU_2018_914_1_MG_RS_BE_2_599	2018_nov_srb_02	Serbia	RS	Belgrade	44.82	20.46	18	2019-01-14	Global sewage consortium	wastewater	wastewater metagenome	ERS5184587	ERX4600293	ERR4678669	Illumina	paired	Illumina NovaSeq 6000	Europe & Central Asia
SRB	DTU_2016_159_1_MG_SRB-37	2016_pil_srb_01	Serbia	RS	Belgrade	44.82	20.46	16	2016-01-27	Global sewage consortium	wastewater	wastewater metagenome	ERS2521021	ERX2624187	ERR2607531	Illumina	paired	Illumina HiSeq 3000	Europe & Central Asia
SRB	DTU_2018_688_1_MG_RS_BE_376	2018_jun_srb_01	Serbia	RS	Belgrade	44.82	20.46	18	2018-06-12	Global sewage consortium	wastewater	wastewater metagenome	ERS5186668	ERX4604260	ERR4682811	Illumina	paired	Illumina NovaSeq 6000	Europe & Central Asia
SRB	DTU_2017_358_1_MG_RS_BE	2017_jun_srb_01	Serbia	RS	Belgrade	44.82	20.46	17	2017-06-16	Global sewage consortium	wastewater	wastewater metagenome	ERS2597435	ERX2697844	ERR2683230	Illumina	paired	Illumina NovaSeq 6000	Europe & Central Asia
SRB	DTU_2017_636_1_MG_RS_BE_332	2017_nov_srb_01	Serbia	RS	Belgrade	44.82	20.46	17	2017	Global sewage consortium	wastewater	wastewater metagenome	ERS5186590	ERX4603919	ERR4682467	Illumina	paired	Illumina NovaSeq 6000	Europe & Central Asia
SRB	DTU_2018_913_1_MG_RS_BE_598	2018_nov_srb_01	Serbia	RS	Belgrade	44.82	20.46	18	2019-01-14	Global sewage consortium	wastewater	wastewater metagenome	ERS5184586	ERX4600292	ERR4678668	Illumina	paired	Illumina NovaSeq 6000	Europe & Central Asia
SVK	DTU_2016_162_1_MG_SVK-9	2016_pil_svk_01	Slovakia	SK	Bratislava	48.15	17.11	16	2016-02-02	Global sewage consortium	wastewater	wastewater metagenome	ERS2521023	ERX2624189	ERR2607533	Illumina	paired	Illumina HiSeq 3000	Europe & Central Asia
SVK	DTU_2018_893_1_MG_SK_BR_580	2018_nov_svk_01	Slovakia	SK	Bratislava	48.15	17.11	18	2018-12-05	Global sewage consortium	wastewater	wastewater metagenome	ERS5184566	ERX4600272	ERR4678648	Illumina	paired	Illumina NovaSeq 6000	Europe & Central Asia
SVK	DTU_2018_699_1_MG_SK_BR_388	2018_jun_svk_01	Slovakia	SK	Bratislava	48.15	17.11	18	2018-07-03	Global sewage consortium	wastewater	wastewater metagenome	ERS5186679	ERX4604271	ERR4682822	Illumina	paired	Illumina NovaSeq 6000	Europe & Central Asia
SVK	DTU_2017_375_1_MG_SK_BR	2017_jun_svk_01	Slovakia	SK	Bratislava	48.15	17.11	17	2017-06-22	Global sewage consortium	wastewater	wastewater metagenome	ERS2597454	ERX2697863	ERR2683249	Illumina	paired	Illumina NovaSeq 6000	Europe & Central Asia
SVK	DTU_2016_163_2_MG_SVK-9_1	2016_pil_svk_01	Slovakia	SK	Bratislava	48.15	17.11	16	2016-02-02	Global sewage consortium	wastewater	wastewater metagenome	ERS2521022	ERX2624188	ERR2607532	Illumina	paired	Illumina HiSeq 3000	Europe & Central Asia
SVK	DTU_2017_528_1_MG_SK_BR_224	2017_nov_svk_01	Slovakia	SK	Bratislava	48.15	17.11	17	2017-11-21	Global sewage consortium	wastewater	wastewater metagenome	ERS5186488	ERX4603817	ERR4682365	Illumina	paired	Illumina NovaSeq 6000	Europe & Central Asia
SVN	DTU_2018_675_1_MG_SI_LJ_363	2018_jun_svn_01	Slovenia	SI	Ljubljana	46.05	14.51	18	2018-06-20	Global sewage consortium	wastewater	wastewater metagenome	ERS5186657	ERX4604249	ERR4682800	Illumina	paired	Illumina NovaSeq 6000	Europe & Central Asia
SVN	DTU_2017_526_1_MG_SI_LJ_222	2017_nov_svn_01	Slovenia	SI	Ljubljana	46.05	14.51	17	2017-11-30	Global sewage consortium	wastewater	wastewater metagenome	ERS5186486	ERX4603815	ERR4682363	Illumina	paired	Illumina NovaSeq 6000	Europe & Central Asia
SVN	DTU_2016_164_1_MG_SVN-38	2016_pil_svn_01	Slovenia	SI	Ljubljana	46.05	14.51	16	2016-01-25	Global sewage consortium	wastewater	wastewater metagenome	ERS2521026	ERX2624192	ERR2607536	Illumina	paired	Illumina HiSeq 3000	Europe & Central Asia
SVN	DTU_2016_165_2_MG_SVN-38_1	2016_pil_svn_01	Slovenia	SI	Ljubljana	46.05	14.51	16	2016-01-25	Global sewage consortium	wastewater	wastewater metagenome	ERS2521024	ERX2624190	ERR2607534	Illumina	paired	Illumina HiSeq 3000	Europe & Central Asia
SVN	DTU_2018_828_1_MG_SI_LJ_512	2018_nov_svn_01	Slovenia	SI	Ljubljana	46.05	14.51	18	2018-12-11	Global sewage consortium	wastewater	wastewater metagenome	ERS5184504	ERX4600210	ERR4678586	Illumina	paired	Illumina NovaSeq 6000	Europe & Central Asia
SVN	DTU_2017_348_1_MG_SI_LJ	2017_jun_svn_01	Slovenia	SI	Ljubljana	46.05	14.51	17	2017-06-14	Global sewage consortium	wastewater	wastewater metagenome	ERS2597424	ERX2697833	ERR2683219	Illumina	paired	Illumina NovaSeq 6000	Europe & Central Asia
SVN	DTU_2016_166_3_MG_SVN-38_2	2016_pil_svn_01	Slovenia	SI	Ljubljana	46.05	14.51	16	2016-01-25	Global sewage consortium	wastewater	wastewater metagenome	ERS2521025	ERX2624191	ERR2607535	Illumina	paired	Illumina HiSeq 3000	Europe & Central Asia
SWE	DTU_2016_167_1_MG_SWE-41	2016_pil_swe_01	Sweden	SE	Uppsala	59.86	17.64	16	2016-02-02	Global sewage consortium	wastewater	wastewater metagenome	ERS2521030	ERX2624196	ERR2607540	Illumina	paired	Illumina HiSeq 3000	Europe & Central Asia
SWE	DTU_2016_169_2_MG_SWE-41a_1	2016_pil_swe_02	Sweden	SE	Gothenburg	57.71	11.97	16	2016-11-02	Global sewage consortium	wastewater	wastewater metagenome	ERS2521027	ERX2624193	ERR2607537	Illumina	paired	Illumina HiSeq 3000	Europe & Central Asia
SWE	DTU_2017_349_1_MG_SE_UP	2017_jun_swe_01	Sweden	SE	Uppsala	59.86	17.64	17	2017-06-12	Global sewage consortium	wastewater	wastewater metagenome	ERS2597425	ERX2697834	ERR2683220	Illumina	paired	Illumina NovaSeq 6000	Europe & Central Asia
SWE	DTU_2018_651_1_MG_SE_UP_339	2018_jun_swe_02	Sweden	SE	Uppsala	59.86	17.64	18	2018-06-18	Global sewage consortium	wastewater	wastewater metagenome	ERS5186634	ERX4604226	ERR4682777	Illumina	paired	Illumina NovaSeq 6000	Europe & Central Asia
SWE	DTU_2018_801_1_MG_SE_GO_485	2018_nov_swe_01	Sweden	SE	Gothenburg	57.71	11.97	18	2018-11-21	Global sewage consortium	wastewater	wastewater metagenome	ERS5184478	ERX4600184	ERR4678560	Illumina	paired	Illumina NovaSeq 6000	Europe & Central Asia
SWE	DTU_2017_376_1_MG_SE_GO	2017_jun_swe_02	Sweden	SE	Gothenburg	57.71	11.97	17	2017-06-08	Global sewage consortium	wastewater	wastewater metagenome	ERS2597455	ERX2697864	ERR2683250	Illumina	paired	Illumina NovaSeq 6000	Europe & Central Asia
SWE	DTU_2018_650_1_MG_SE_GO_338	2018_jun_swe_01	Sweden	SE	Gothenburg	57.71	11.97	18	2018-06-15	Global sewage consortium	wastewater	wastewater metagenome	ERS5186633	ERX4604225	ERR4682776	Illumina	paired	Illumina NovaSeq 6000	Europe & Central Asia
SWE	DTU_2016_168_1_MG_SWE-41a	2016_pil_swe_02	Sweden	SE	Gothenburg	57.71	11.97	16	2016-11-02	Global sewage consortium	wastewater	wastewater metagenome	ERS2521029	ERX2624195	ERR2607539	Illumina	paired	Illumina HiSeq 3000	Europe & Central Asia
SWE	DTU_2017_492_1_MG_SE_GO_188	2017_nov_swe_01	Sweden	SE	Gothenburg	57.71	11.97	17	2017-11-19	Global sewage consortium	wastewater	wastewater metagenome	ERS5186456	ERX4603785	ERR4682333	Illumina	paired	Illumina NovaSeq 6000	Europe & Central Asia
SWE	DTU_2016_170_3_MG_SWE-41a_2	2016_pil_swe_02	Sweden	SE	Gothenburg	57.71	11.97	16	2016-11-02	Global sewage consortium	wastewater	wastewater metagenome	ERS2521028	ERX2624194	ERR2607538	Illumina	paired	Illumina HiSeq 3000	Europe & Central Asia
SWE	DTU_2017_572_1_MG_SE_UP_268	2017_nov_swe_02	Sweden	SE	Uppsala	59.86	17.64	17	2017-11-27	Global sewage consortium	wastewater	wastewater metagenome	ERS5186526	ERX4603855	ERR4682403	Illumina	paired	Illumina NovaSeq 6000	Europe & Central Asia
TGO	DTU_2018_670_1_MG_TG_LO_358	2018_jun_tgo_01	Togo	TG	Lome	6.13	1.22	18	2018-06-23	Global sewage consortium	wastewater	wastewater metagenome	ERS5186652	ERX4604244	ERR4682795	Illumina	paired	Illumina NovaSeq 6000	Sub-Saharan Africa
TGO	DTU_2016_176_1_MG_TGO-44	2016_pil_tgo_01	Togo	TG	Lome	6.13	1.22	16	2016-01-26	Global sewage consortium	wastewater	wastewater metagenome	ERS2521036	ERX2624202	ERR2607546	Illumina	paired	Illumina HiSeq 3000	Sub-Saharan Africa
TGO	DTU_2018_929_1_MG_TG_LO_612	2018_nov_tgo_01	Togo	TG	Lome	6.13	1.22	18	2018-11-25	Global sewage consortium	wastewater	wastewater metagenome	ERS5184598	ERX4600304	ERR4678680	Illumina	paired	Illumina NovaSeq 6000	Sub-Saharan Africa
TGO	DTU_2017_393_1_MG_TG_LO	2017_jun_tgo_01	Togo	TG	Lome	6.13	1.22	17	2017-06-14	Global sewage consortium	wastewater	wastewater metagenome	ERS2597473	ERX2697882	ERR2683268	Illumina	paired	Illumina NovaSeq 6000	Sub-Saharan Africa
TGO	DTU_2017_585_1_MG_TG_LO_281	2017_nov_tgo_01	Togo	TG	Lome	6.13	1.22	17	2017-11-27	Global sewage consortium	wastewater	wastewater metagenome	ERS5186539	ERX4603868	ERR4682416	Illumina	paired	Illumina NovaSeq 6000	Sub-Saharan Africa
TUR	DTU_2016_177_1_MG_TUR-46	2016_pil_tur_01	Turkey	TR	Ankara	39.72	32.71	16	2016-01-29	Global sewage consortium	wastewater	wastewater metagenome	ERS2521039	ERX2624205	ERR2607549	Illumina	paired	Illumina HiSeq 3000	Europe & Central Asia
TUR	DTU_2016_179_3_MG_TUR-46_2	2016_pil_tur_01	Turkey	TR	Ankara	39.72	32.71	16	2016-01-29	Global sewage consortium	wastewater	wastewater metagenome	ERS2521038	ERX2624204	ERR2607548	Illumina	paired	Illumina HiSeq 3000	Europe & Central Asia
TUR	DTU_2016_178_2_MG_TUR-46_1	2016_pil_tur_01	Turkey	TR	Ankara	39.72	32.71	16	2016-01-29	Global sewage consortium	wastewater	wastewater metagenome	ERS2521037	ERX2624203	ERR2607547	Illumina	paired	Illumina HiSeq 3000	Europe & Central Asia
TUR	DTU_2018_676_1_MG_TR_HA_364	2018_jun_tur_01	Turkey	TR	Hatay	36.2	36.16	18	2018-06-29	Global sewage consortium	wastewater	wastewater metagenome	ERS5186658	ERX4604250	ERR4682801	Illumina	paired	Illumina NovaSeq 6000	Europe & Central Asia
TUR	DTU_2018_836_1_MG_TR_HA_520	2018_nov_tur_01	Turkey	TR	Hatay	36.2	36.16	18	2018-12-04	Global sewage consortium	wastewater	wastewater metagenome	ERS5184512	ERX4600218	ERR4678594	Illumina	paired	Illumina NovaSeq 6000	Europe & Central Asia
TZA	DTU_2017_424_1_MG_TZ_MS	2017_jun_tza_03	Tanzania	TZ	Moshi	-3.35	37.34	17	2017-06-12	Global sewage consortium	wastewater	wastewater metagenome	ERS2597340	ERX2697749	ERR2683135	Illumina	paired	Illumina NovaSeq 6000	Sub-Saharan Africa
TZA	DTU_2018_681_1_MG_TZ_MO_369	2018_jun_tza_01	Tanzania	TZ	Morogoro	-6.87	37.81	18	2018-06-25	Global sewage consortium	wastewater	wastewater metagenome	ERS5186661	ERX4604253	ERR4682804	Illumina	paired	Illumina NovaSeq 6000	Sub-Saharan Africa
TZA	DTU_2018_682_1_MG_TZ_MW_370	2018_jun_tza_02	Tanzania	TZ	Mwanza	-2.52	32.9	18	2018-06-20	Global sewage consortium	wastewater	wastewater metagenome	ERS5186662	ERX4604254	ERR4682805	Illumina	paired	Illumina NovaSeq 6000	Sub-Saharan Africa
TZA	DTU_2018_1072_1_MG_TZ_MO_10	2018_tan_tza_09	Tanzania	TZ	Moshi	-3.35	37.34	18	2018-09-26		wastewater	wastewater metagenome	--	--	--	Illumina	paired	Illumina NovaSeq 6000	Sub-Saharan Africa
TZA	DTU_2018_1071_1_MG_TZ_MO_9	2018_tan_tza_08	Tanzania	TZ	Moshi	-3.35	37.34	18	2018-09-18		wastewater	wastewater metagenome	--	--	--	Illumina	paired	Illumina NovaSeq 6000	Sub-Saharan Africa
TZA	DTU_2016_180_1_MG_TZA-15	2016_pil_tza_01	Tanzania	TZ	Moshi	-3.35	37.34	16	2016-03-02	Global sewage consortium	wastewater	wastewater metagenome	ERS2521040	ERX2624206	ERR2607550	Illumina	paired	Illumina HiSeq 3000	Sub-Saharan Africa
TZA	DTU_2017_620_1_MG_TZ_MS_316	2017_nov_tza_03	Tanzania	TZ	Moshi	-3.35	37.34	17	2017-11-29	Global sewage consortium	wastewater	wastewater metagenome	ERS5186574	ERX4603903	ERR4682451	Illumina	paired	Illumina NovaSeq 6000	Sub-Saharan Africa
TZA	DTU_2017_365_1_MG_TZ_MO	2017_jun_tza_02	Tanzania	TZ	Morogoro	-6.87	37.81	17	2017-06-17	Global sewage consortium	wastewater	wastewater metagenome	ERS2597443	ERX2697852	ERR2683238	Illumina	paired	Illumina NovaSeq 6000	Sub-Saharan Africa
TZA	DTU_2016_239_2_MG_Reproduce_15_3	2016_pil_tza_03	Tanzania	TZ	Moshi	-3.35	37.34	16	2016-02-04	Global sewage consortium	wastewater	wastewater metagenome	--	--	--	Illumina	paired	Illumina HiSeq 3000	Sub-Saharan Africa
TZA	DTU_2018_1070_1_MG_TZ_MO_8	2018_tan_tza_07	Tanzania	TZ	Moshi	-3.35	37.34	18	2018-09-01		wastewater	wastewater metagenome	--	--	--	Illumina	paired	Illumina NovaSeq 6000	Sub-Saharan Africa
TZA	DTU_2016_238_1_MG_Reproduce_15_1	2016_pil_tza_02	Tanzania	TZ	Moshi	-3.35	37.34	16	2016-02-04	Global sewage consortium	wastewater	wastewater metagenome	--	--	--	Illumina	paired	Illumina HiSeq 3000	Sub-Saharan Africa
TZA	DTU_2017_514_1_MG_TZ_MW_210	2017_nov_tza_01	Tanzania	TZ	Mwanza	-2.52	32.9	17	2017-11-20	Global sewage consortium	wastewater	wastewater metagenome	ERS5186478	ERX4603807	ERR4682355	Illumina	paired	Illumina NovaSeq 6000	Sub-Saharan Africa
TZA	DTU_2018_1069_1_MG_TZ_MO_7	2018_tan_tza_06	Tanzania	TZ	Moshi	-3.35	37.34	18	2018-09-11		wastewater	wastewater metagenome	--	--	--	Illumina	paired	Illumina NovaSeq 6000	Sub-Saharan Africa
TZA	DTU_2018_1064_1_MG_TZ_MO_2	2018_tan_tza_01	Tanzania	TZ	Moshi	-3.35	37.34	18	2018-08-03		wastewater	wastewater metagenome	--	--	--	Illumina	paired	Illumina NovaSeq 6000	Sub-Saharan Africa
TZA	DTU_2017_515_1_MG_TZ_MO_211	2017_nov_tza_02	Tanzania	TZ	Morogoro	-6.87	37.81	17	2017-11-21	Global sewage consortium	wastewater	wastewater metagenome	ERS5186479	ERX4603808	ERR4682356	Illumina	paired	Illumina NovaSeq 6000	Sub-Saharan Africa
TZA	DTU_2017_364_1_MG_TZ_MW	2017_jun_tza_01	Tanzania	TZ	Mwanza	-2.52	32.9	17	2017-06-12	Global sewage consortium	wastewater	wastewater metagenome	ERS2597442	ERX2697851	ERR2683237	Illumina	paired	Illumina NovaSeq 6000	Sub-Saharan Africa
TZA	DTU_2018_1068_1_MG_TZ_MO_6	2018_tan_tza_05	Tanzania	TZ	Moshi	-3.35	37.34	18	2018-09-04		wastewater	wastewater metagenome	--	--	--	Illumina	paired	Illumina NovaSeq 6000	Sub-Saharan Africa
TZA	DTU_2018_1065_1_MG_TZ_MO_3	2018_tan_tza_02	Tanzania	TZ	Moshi	-3.35	37.34	18	2018-08-09		wastewater	wastewater metagenome	--	--	--	Illumina	paired	Illumina NovaSeq 6000	Sub-Saharan Africa
TZA	DTU_2018_840_1_MG_TZ_MW_524	2018_nov_tza_02	Tanzania	TZ	Mwanza	-2.52	32.9	18	2018-11-28	Global sewage consortium	wastewater	wastewater metagenome	ERS5184516	ERX4600222	ERR4678598	Illumina	paired	Illumina NovaSeq 6000	Sub-Saharan Africa
TZA	DTU_2018_1067_1_MG_TZ_MO_5	2018_tan_tza_04	Tanzania	TZ	Moshi	-3.35	37.34	18	2018-08-20		wastewater	wastewater metagenome	--	--	--	Illumina	paired	Illumina NovaSeq 6000	Sub-Saharan Africa
TZA	DTU_2018_1066_1_MG_TZ_MO_4	2018_tan_tza_03	Tanzania	TZ	Moshi	-3.35	37.34	18	2018-08-17		wastewater	wastewater metagenome	--	--	--	Illumina	paired	Illumina NovaSeq 6000	Sub-Saharan Africa
TZA	DTU_2018_785_1_MG_TZ_MS_482	2018_jun_tza_03	Tanzania	TZ	Moshi	-3.35	37.34	18	2018-08-03	Global sewage consortium	wastewater	wastewater metagenome	ERS5186757	ERX4604349	ERR4682900	Illumina	paired	Illumina NovaSeq 6000	Sub-Saharan Africa
TZA	DTU_2018_839_1_MG_TZ_MO_523	2018_nov_tza_01	Tanzania	TZ	Morogoro	-6.87	37.81	18	2018-11-28	Global sewage consortium	wastewater	wastewater metagenome	ERS5184515	ERX4600221	ERR4678597	Illumina	paired	Illumina NovaSeq 6000	Sub-Saharan Africa
USA	DTU_2016_211_2_MG_USA-74g_1	2016_pil_usa_08	USA	US	El Paso	31.78	-106.46	16	2016-02-23	Global sewage consortium	wastewater	wastewater metagenome	ERS2521069	ERX2624235	ERR2607579	Illumina	paired	Illumina HiSeq 3000	North America
USA	DTU_2016_183_2_MG_USA-74a_1	2016_pil_usa_02	USA	US	Seattle	47.6	-122.33	16	2016-01-02	Global sewage consortium	wastewater	wastewater metagenome	ERS2521041	ERX2624207	ERR2607551	Illumina	paired	Illumina HiSeq 3000	North America
USA	DTU_2016_212_3_MG_USA-74g_2	2016_pil_usa_08	USA	US	El Paso	31.78	-106.46	16	2016-02-23	Global sewage consortium	wastewater	wastewater metagenome	ERS2521070	ERX2624236	ERR2607580	Illumina	paired	Illumina HiSeq 3000	North America
USA	DTU_2016_210_1_MG_USA-74g	2016_pil_usa_08	USA	US	El Paso	31.78	-106.46	16	2016-02-23	Global sewage consortium	wastewater	wastewater metagenome	ERS2521077	ERX2624243	ERR2607587	Illumina	paired	Illumina HiSeq 3000	North America
USA	DTU_2016_182_1_MG_USA-74a	2016_pil_usa_02	USA	US	Seattle	47.6	-122.33	16	2016-01-02	Global sewage consortium	wastewater	wastewater metagenome	ERS2521044	ERX2624210	ERR2607554	Illumina	paired	Illumina HiSeq 3000	North America
USA	DTU_2016_213_4_MG_USA-74g_3	2016_pil_usa_08	USA	US	El Paso	31.78	-106.46	16	2016-02-23	Global sewage consortium	wastewater	wastewater metagenome	ERS2521071	ERX2624237	ERR2607581	Illumina	paired	Illumina HiSeq 3000	North America
USA	DTU_2017_370_1_MG_US_WA	2017_jun_usa_02	USA	US	Waco	31.55	-97.15	17	2017-06-15	Global sewage consortium	wastewater	wastewater metagenome	ERS2597448	ERX2697857	ERR2683243	Illumina	paired	Illumina NovaSeq 6000	North America
USA	DTU_2018_852_1_MG_US_AT_536	2018_nov_usa_02	USA	US	Atlanta	33.75	-84.39	18	2018-11-29	Global sewage consortium	wastewater	wastewater metagenome	ERS5184525	ERX4600231	ERR4678607	Illumina	paired	Illumina NovaSeq 6000	North America
USA	DTU_2016_195_1_MG_USA-74d	2016_pil_usa_05	USA	US	Portland	45.52	-122.67	16	2016-10-02	Global sewage consortium	wastewater	wastewater metagenome	ERS2521057	ERX2624223	ERR2607567	Illumina	paired	Illumina HiSeq 3000	North America
USA	DTU_2017_616_1_MG_US_WA_312	2017_nov_usa_05	USA	US	Waco	31.55	-97.15	17	2018-01-11	Global sewage consortium	wastewater	wastewater metagenome	ERS5186570	ERX4603899	ERR4682447	Illumina	paired	Illumina NovaSeq 6000	North America
USA	DTU_2018_1018_1_MG_US1808_L69	2018_lon_usa_11	USA	US	Seattle	47.6	-122.33	18	2018-08-23	Global sewage consortium	wastewater	wastewater metagenome	--	--	--	Illumina	paired	Illumina NovaSeq 6000	North America
USA	DTU_2017_593_1_MG_US_CH_289	2017_nov_usa_01	USA	US	Chapel Hill	35.91	-79.06	17	2017-11-02	Global sewage consortium	wastewater	wastewater metagenome	ERS5186547	ERX4603876	ERR4682424	Illumina	paired	Illumina NovaSeq 6000	North America
USA	DTU_2016_208_6_MG_USA-74f_5	2016_pil_usa_07	USA	US	El Paso	31.78	-106.46	16	2016-02-22	Global sewage consortium	wastewater	wastewater metagenome	ERS2521066	ERX2624232	ERR2607576	Illumina	paired	Illumina HiSeq 3000	North America
USA	DTU_2017_1005_1_MG_US1712_L54	2017_lon_usa_04	USA	US	Seattle	47.6	-122.33	17	2017-12-20	Global sewage consortium	wastewater	wastewater metagenome	--	--	--	Illumina	paired	Illumina NovaSeq 6000	North America
USA	DTU_2016_197_3_MG_USA-74d_2	2016_pil_usa_05	USA	US	Portland	45.52	-122.67	16	2016-10-02	Global sewage consortium	wastewater	wastewater metagenome	ERS2521055	ERX2624221	ERR2607565	Illumina	paired	Illumina HiSeq 3000	North America
USA	DTU_2016_196_2_MG_USA-74d_1	2016_pil_usa_05	USA	US	Portland	45.52	-122.67	16	2016-10-02	Global sewage consortium	wastewater	wastewater metagenome	ERS2521054	ERX2624220	ERR2607564	Illumina	paired	Illumina HiSeq 3000	North America
USA	DTU_2018_1006_1_MG_US1801_L55	2018_lon_usa_05	USA	US	Seattle	47.6	-122.33	18	2018-01-30	Global sewage consortium	wastewater	wastewater metagenome	--	--	--	Illumina	paired	Illumina NovaSeq 6000	North America
USA	DTU_2018_1016_1_MG_US1805_L67	2018_lon_usa_09	USA	US	Seattle	47.6	-122.33	18	2018-05-13	Global sewage consortium	wastewater	wastewater metagenome	--	--	--	Illumina	paired	Illumina NovaSeq 6000	North America
USA	DTU_2018_764_1_MG_US_CH_461	2018_jun_usa_03	USA	US	Chapel Hill	35.91	-79.06	18	2018-09-12	Global sewage consortium	wastewater	wastewater metagenome	ERS5186740	ERX4604332	ERR4682883	Illumina	paired	Illumina NovaSeq 6000	North America
USA	DTU_2016_209_7_MG_USA-74f_6	2016_pil_usa_07	USA	US	El Paso	31.78	-106.46	16	2016-02-22	Global sewage consortium	wastewater	wastewater metagenome	ERS2521067	ERX2624233	ERR2607577	Illumina	paired	Illumina HiSeq 3000	North America
USA	DTU_2017_983_1_MG_US1709_L28	2017_lon_usa_01	USA	US	Seattle	47.6	-122.33	17	2017-09-28	Global sewage consortium	wastewater	wastewater metagenome	--	--	--	Illumina	paired	Illumina NovaSeq 6000	North America
USA	DTU_2018_779_1_MG_US_WA_476	2018_jun_usa_05	USA	US	Waco	31.55	-97.15	18	2018-06-21	Global sewage consortium	wastewater	wastewater metagenome	ERS5186751	ERX4604343	ERR4682894	Illumina	paired	Illumina NovaSeq 6000	North America
USA	DTU_2016_193_1_MG_USA-74c	2016_pil_usa_04	USA	US	El Paso	31.78	-106.46	16	2016-02-23	Global sewage consortium	wastewater	wastewater metagenome	ERS2521049	ERX2624215	ERR2607559	Illumina	paired	Illumina HiSeq 3000	North America
USA	DTU_2016_181_1_MG_USA-74	2016_pil_usa_01	USA	US	Atlanta	33.75	-84.39	16	2016-02-02	Global sewage consortium	wastewater	wastewater metagenome	ERS2521080	ERX2624246	ERR2607590	Illumina	paired	Illumina HiSeq 3000	North America
USA	DTU_2017_615_1_MG_US_AU_311	2017_nov_usa_04	USA	US	Austin	30.27	-97.74	17	2018-01-18	Global sewage consortium	wastewater	wastewater metagenome	ERS5186569	ERX4603898	ERR4682446	Illumina	paired	Illumina NovaSeq 6000	North America
USA	DTU_2016_194_2_MG_USA-74c_1	2016_pil_usa_04	USA	US	El Paso	31.78	-106.46	16	2016-02-23	Global sewage consortium	wastewater	wastewater metagenome	ERS2521050	ERX2624216	ERR2607560	Illumina	paired	Illumina HiSeq 3000	North America
USA	DTU_2018_1017_1_MG_US1807_L68	2018_lon_usa_10	USA	US	Seattle	47.6	-122.33	18	2018-07-17	Global sewage consortium	wastewater	wastewater metagenome	--	--	--	Illumina	paired	Illumina NovaSeq 6000	North America
USA	DTU_2016_185_4_MG_USA-74a_3	2016_pil_usa_02	USA	US	Seattle	47.6	-122.33	16	2016-01-02	Global sewage consortium	wastewater	wastewater metagenome	ERS2521043	ERX2624209	ERR2607553	Illumina	paired	Illumina HiSeq 3000	North America
USA	DTU_2017_321_1_MG_US_PO	2017_jun_usa_01	USA	US	Portland	45.52	-122.67	17	2017-01-01	Global sewage consortium	wastewater	wastewater metagenome	ERS2597394	ERX2697803	ERR2683189	Illumina	paired	Illumina NovaSeq 6000	North America
USA	DTU_2016_187_2_MG_USA-74b_1	2016_pil_usa_03	USA	US	Chicago	41.88	-87.62	16	2016-02-24	Global sewage consortium	wastewater	wastewater metagenome	ERS2521045	ERX2624211	ERR2607555	Illumina	paired	Illumina HiSeq 3000	North America
USA	DTU_2016_193_1_MG_USA-74c_2	2016_pil_usa_04	USA	US	El Paso	31.78	-106.46	16	2016-02-23	Global sewage consortium	wastewater	wastewater metagenome	ERS2521053	ERX2624219	ERR2607563	Illumina	paired	Illumina HiSeq 3000	North America
USA	DTU_2016_189_4_MG_USA-74b_3	2016_pil_usa_03	USA	US	Chicago	41.88	-87.62	16	2016-02-24	Global sewage consortium	wastewater	wastewater metagenome	ERS2521047	ERX2624213	ERR2607557	Illumina	paired	Illumina HiSeq 3000	North America
USA	DTU_2016_200_2_MG_USA-74e_1	2016_pil_usa_06	USA	US	El Paso	31.78	-106.46	16	2016-02-22	Global sewage consortium	wastewater	wastewater metagenome	ERS2521058	ERX2624224	ERR2607568	Illumina	paired	Illumina HiSeq 3000	North America
USA	DTU_2018_945_1_MG_US_CH_2_627	2018_nov_usa_04	USA	US	Chapel Hill	35.91	-79.06	18	2018-01-22	Global sewage consortium	wastewater	wastewater metagenome	ERS5184612	ERX4600318	ERR4678694	Illumina	paired	Illumina NovaSeq 6000	North America
USA	DTU_2016_207_5_MG_USA-74f_4	2016_pil_usa_07	USA	US	El Paso	31.78	-106.46	16	2016-02-22	Global sewage consortium	wastewater	wastewater metagenome	ERS2521065	ERX2624231	ERR2607575	Illumina	paired	Illumina HiSeq 3000	North America
USA	DTU_2016_194_2_MG_USA-74c_3	2016_pil_usa_04	USA	US	El Paso	31.78	-106.46	16	2016-02-23	Global sewage consortium	wastewater	wastewater metagenome	ERS2521052	ERX2624218	ERR2607562	Illumina	paired	Illumina HiSeq 3000	North America
USA	DTU_2016_217_8_MG_USA-74g_7	2016_pil_usa_08	USA	US	El Paso	31.78	-106.46	16	2016-02-23	Global sewage consortium	wastewater	wastewater metagenome	ERS2521075	ERX2624241	ERR2607585	Illumina	paired	Illumina HiSeq 3000	North America
USA	DTU_2017_462_1_MG_US_CH	2017_jun_usa_08	USA	US	Chapel Hill	35.91	-79.06	17	2017-06-20	Global sewage consortium	wastewater	wastewater metagenome	ERS2597381	ERX2697790	ERR2683176	Illumina	paired	Illumina NovaSeq 6000	North America
USA	DTU_2017_398_1_MG_US_SE	2017_jun_usa_06	USA	US	Seattle	47.6	-122.33	17	2017-06-13	Global sewage consortium	wastewater	wastewater metagenome	ERS2597479	ERX2697888	ERR2683274	Illumina	paired	Illumina NovaSeq 6000	North America
USA	DTU_2016_199_1_MG_USA-74e	2016_pil_usa_06	USA	US	El Paso	31.78	-106.46	16	2016-02-22	Global sewage consortium	wastewater	wastewater metagenome	ERS2521061	ERX2624227	ERR2607571	Illumina	paired	Illumina HiSeq 3000	North America
USA	DTU_2018_1015_1_MG_US1804_L66	2018_lon_usa_08	USA	US	Seattle	47.6	-122.33	18	2018-04-15	Global sewage consortium	wastewater	wastewater metagenome	--	--	--	Illumina	paired	Illumina NovaSeq 6000	North America
USA	DTU_2016_184_3_MG_USA-74a_2	2016_pil_usa_02	USA	US	Seattle	47.6	-122.33	16	2016-01-02	Global sewage consortium	wastewater	wastewater metagenome	ERS2521042	ERX2624208	ERR2607552	Illumina	paired	Illumina HiSeq 3000	North America
USA	DTU_2016_216_7_MG_USA-74g_6	2016_pil_usa_08	USA	US	El Paso	31.78	-106.46	16	2016-02-23	Global sewage consortium	wastewater	wastewater metagenome	ERS2521074	ERX2624240	ERR2607584	Illumina	paired	Illumina HiSeq 3000	North America
USA	DTU_2016_206_4_MG_USA-74f_3	2016_pil_usa_07	USA	US	El Paso	31.78	-106.46	16	2016-02-22	Global sewage consortium	wastewater	wastewater metagenome	ERS2521064	ERX2624230	ERR2607574	Illumina	paired	Illumina HiSeq 3000	North America
USA	DTU_2018_778_1_MG_US_AT_475	2018_jun_usa_04	USA	US	Atlanta	33.75	-84.39	18	2018-09-27	Global sewage consortium	wastewater	wastewater metagenome	ERS5186750	ERX4604342	ERR4682893	Illumina	paired	Illumina NovaSeq 6000	North America
USA	DTU_2016_203_1_MG_USA-74f	2016_pil_usa_07	USA	US	El Paso	31.78	-106.46	16	2016-02-22	Global sewage consortium	wastewater	wastewater metagenome	ERS2521068	ERX2624234	ERR2607578	Illumina	paired	Illumina HiSeq 3000	North America
USA	DTU_2016_198_4_MG_USA-74d_3	2016_pil_usa_05	USA	US	Portland	45.52	-122.67	16	2016-10-02	Global sewage consortium	wastewater	wastewater metagenome	ERS2521056	ERX2624222	ERR2607566	Illumina	paired	Illumina HiSeq 3000	North America
USA	DTU_2017_614_1_MG_US_HO_310	2017_nov_usa_03	USA	US	Houston	29.76	-95.37	17	2018-01-19	Global sewage consortium	wastewater	wastewater metagenome	ERS5186568	ERX4603897	ERR4682445	Illumina	paired	Illumina NovaSeq 6000	North America
USA	DTU_2016_190_5_MG_USA-74b_4	2016_pil_usa_03	USA	US	Chicago	41.88	-87.62	16	2016-02-24	Global sewage consortium	wastewater	wastewater metagenome	ERS2521048	ERX2624214	ERR2607558	Illumina	paired	Illumina HiSeq 3000	North America
USA	DTU_2018_873_1_MG_US_CH_557	2018_nov_usa_03	USA	US	Chapel Hill	35.91	-79.06	18	2019-01-16	Global sewage consortium	wastewater	wastewater metagenome	ERS5184546	ERX4600252	ERR4678628	Illumina	paired	Illumina NovaSeq 6000	North America
USA	DTU_2016_214_5_MG_USA-74g_4	2016_pil_usa_08	USA	US	El Paso	31.78	-106.46	16	2016-02-23	Global sewage consortium	wastewater	wastewater metagenome	ERS2521072	ERX2624238	ERR2607582	Illumina	paired	Illumina HiSeq 3000	North America
USA	DTU_2018_751_1_MG_US_SE_448	2018_jun_usa_01	USA	US	Seattle	47.6	-122.33	18	2018-06-21	Global sewage consortium	wastewater	wastewater metagenome	ERS5186728	ERX4604320	ERR4682871	Illumina	paired	Illumina NovaSeq 6000	North America
USA	DTU_2016_204_2_MG_USA-74f_1	2016_pil_usa_07	USA	US	El Paso	31.78	-106.46	16	2016-02-22	Global sewage consortium	wastewater	wastewater metagenome	ERS2521062	ERX2624228	ERR2607572	Illumina	paired	Illumina HiSeq 3000	North America
USA	DTU_2018_822_1_MG_US_CO_506	2018_nov_usa_01	USA	US	Columbus	39.96	-83	18	2018-11-11	Global sewage consortium	wastewater	wastewater metagenome	ERS5184498	ERX4600204	ERR4678580	Illumina	paired	Illumina NovaSeq 6000	North America
USA	DTU_2016_205_3_MG_USA-74f_2	2016_pil_usa_07	USA	US	El Paso	31.78	-106.46	16	2016-02-22	Global sewage consortium	wastewater	wastewater metagenome	ERS2521063	ERX2624229	ERR2607573	Illumina	paired	Illumina HiSeq 3000	North America
USA	DTU_2016_202_4_MG_USA-74e_3	2016_pil_usa_06	USA	US	El Paso	31.78	-106.46	16	2016-02-22	Global sewage consortium	wastewater	wastewater metagenome	ERS2521060	ERX2624226	ERR2607570	Illumina	paired	Illumina HiSeq 3000	North America
USA	DTU_2016_186_1_MG_USA-74b	2016_pil_usa_03	USA	US	Chicago	41.88	-87.62	16	2016-02-24	Global sewage consortium	wastewater	wastewater metagenome	ERS2521051	ERX2624217	ERR2607561	Illumina	paired	Illumina HiSeq 3000	North America
USA	DTU_2017_984_1_MG_US1710_L29	2017_lon_usa_02	USA	US	Seattle	47.6	-122.33	17	2017-10-25	Global sewage consortium	wastewater	wastewater metagenome	--	--	--	Illumina	paired	Illumina NovaSeq 6000	North America
USA	DTU_2016_188_3_MG_USA-74b_2	2016_pil_usa_03	USA	US	Chicago	41.88	-87.62	16	2016-02-24	Global sewage consortium	wastewater	wastewater metagenome	ERS2521046	ERX2624212	ERR2607556	Illumina	paired	Illumina HiSeq 3000	North America
USA	DTU_2016_220_1_MG_USA-74i	2016_pil_usa_10	USA	US	Boulder	40.01	-105.27	16	2016-03-28	Global sewage consortium	wastewater	wastewater metagenome	ERS2521079	ERX2624245	ERR2607589	Illumina	paired	Illumina HiSeq 3000	North America
USA	DTU_2017_985_1_MG_US1712_L30	2017_lon_usa_03	USA	US	Seattle	47.6	-122.33	17	2017-01-12	Global sewage consortium	wastewater	wastewater metagenome	--	--	--	Illumina	paired	Illumina NovaSeq 6000	North America
USA	DTU_2016_218_9_MG_USA-74g_8	2016_pil_usa_08	USA	US	El Paso	31.78	-106.46	16	2016-02-23	Global sewage consortium	wastewater	wastewater metagenome	ERS2521076	ERX2624242	ERR2607586	Illumina	paired	Illumina HiSeq 3000	North America
USA	DTU_2017_371_1_MG_US_AU	2017_jun_usa_03	USA	US	Austin	30.27	-97.74	17	2017-06-08	Global sewage consortium	wastewater	wastewater metagenome	ERS2597449	ERX2697858	ERR2683244	Illumina	paired	Illumina NovaSeq 6000	North America
USA	DTU_2017_611_1_MG_US_SE_307	2017_nov_usa_02	USA	US	Seattle	47.6	-122.33	17	2017-11-28	Global sewage consortium	wastewater	wastewater metagenome	ERS5186565	ERX4603894	ERR4682442	Illumina	paired	Illumina NovaSeq 6000	North America
USA	DTU_2017_372_1_MG_US_HO_a	2017_jun_usa_04	USA	US	Houston	29.76	-95.37	17	2017-06-09	Global sewage consortium	wastewater	wastewater metagenome	ERS2597450	ERX2697859	ERR2683245	Illumina	paired	Illumina NovaSeq 6000	North America
USA	DTU_2018_1007_1_MG_US1802_L56	2018_lon_usa_06	USA	US	Seattle	47.6	-122.33	18	2018-02-22	Global sewage consortium	wastewater	wastewater metagenome	--	--	--	Illumina	paired	Illumina NovaSeq 6000	North America
USA	DTU_2017_374_2_MG_US_HO_b	2017_jun_usa_05	USA	US	Houston	29.76	-95.37	17	2017-06-09	Global sewage consortium	wastewater	wastewater metagenome	ERS2597453	ERX2697862	ERR2683248	Illumina	paired	Illumina NovaSeq 6000	North America
USA	DTU_2018_946_1_MG_US_HO_2_628	2018_nov_usa_05	USA	US	Houston	29.76	-95.37	18	2018-01-19	Global sewage consortium	wastewater	wastewater metagenome	ERS5184613	ERX4600319	ERR4678695	Illumina	paired	Illumina NovaSeq 6000	North America
USA	DTU_2018_1008_1_MG_US1803_L57	2018_lon_usa_07	USA	US	Seattle	47.6	-122.33	18	2018-03-29	Global sewage consortium	wastewater	wastewater metagenome	--	--	--	Illumina	paired	Illumina NovaSeq 6000	North America
USA	DTU_2016_215_6_MG_USA-74g_5	2016_pil_usa_08	USA	US	El Paso	31.78	-106.46	16	2016-02-23	Global sewage consortium	wastewater	wastewater metagenome	ERS2521073	ERX2624239	ERR2607583	Illumina	paired	Illumina HiSeq 3000	North America
USA	DTU_2016_201_3_MG_USA-74e_2	2016_pil_usa_06	USA	US	El Paso	31.78	-106.46	16	2016-02-22	Global sewage consortium	wastewater	wastewater metagenome	ERS2521059	ERX2624225	ERR2607569	Illumina	paired	Illumina HiSeq 3000	North America
USA	DTU_2016_219_1_MG_USA-74h	2016_pil_usa_09	USA	US	South Adams County	42.2	-83.54	16	2016	Global sewage consortium	wastewater	wastewater metagenome	ERS2521078	ERX2624244	ERR2607588	Illumina	paired	Illumina HiSeq 3000	North America
USA	DTU_2018_752_1_MG_US_SE_2_449	2018_jun_usa_02	USA	US	Seattle	47.6	-122.33	18	2018-06-20	Global sewage consortium	wastewater	wastewater metagenome	ERS5186729	ERX4604321	ERR4682872	Illumina	paired	Illumina NovaSeq 6000	North America
USA	DTU_2017_399_1_MG_US_WO	2017_jun_usa_07	USA	US	Woodinville WA	47.75	-122.15	17	2017-06-19	Global sewage consortium	wastewater	wastewater metagenome	ERS2597480	ERX2697889	ERR2683275	Illumina	paired	Illumina NovaSeq 6000	North America
VNM	DTU_2016_221_1_MG_VNM-48	2016_pil_vnm_01	Viet Nam	VN	Ho Chi Minh	10.78	106.7	16	2016-01-27	Global sewage consortium	wastewater	wastewater metagenome	ERS2521081	ERX2624247	ERR2607591	Illumina	paired	Illumina HiSeq 3000	East Asia & Pacific
VNM	DTU_2018_781_1_MG_VN_HO_478	2018_jun_vnm_01	Viet Nam	VN	Ho Chi Minh	10.78	106.7	18	2018	Global sewage consortium	wastewater	wastewater metagenome	ERS5186753	ERX4604345	ERR4682896	Illumina	paired	Illumina NovaSeq 6000	East Asia & Pacific
VNM	DTU_2017_635_1_MG_VN_HO_331	2017_nov_vnm_01	Viet Nam	VN	Ho Chi Minh	10.78	106.7	17	2017-12-27	Global sewage consortium	wastewater	wastewater metagenome	ERS5186589	ERX4603918	ERR4682466	Illumina	paired	Illumina NovaSeq 6000	East Asia & Pacific
VNM	DTU_2017_319_1_MG_VN_HO	2017_jun_vnm_01	Viet Nam	VN	Hanoi	21.03	105.85	17	2017-06-16	Global sewage consortium	wastewater	wastewater metagenome	ERS2597383	ERX2697792	ERR2683178	Illumina	paired	Illumina NovaSeq 6000	East Asia & Pacific
XKX	DTU_2016_222_1_MG_XK-60	2016_pil_rks_01	Kosovo	XK	Prishtina	42.66	21.16	16	2016-03-02	Global sewage consortium	wastewater	wastewater metagenome	ERS2521082	ERX2624248	ERR2607592	Illumina	paired	Illumina HiSeq 3000	Europe & Central Asia
ZAF	DTU_2016_224_2_MG_ZAF-39_1	2016_pil_zaf_01	South Africa	ZA	Johannesburg	-26.21	28.05	16	2016-04-02	Global sewage consortium	wastewater	wastewater metagenome	ERS2521083	ERX2624249	ERR2607593	Illumina	paired	Illumina HiSeq 3000	Sub-Saharan Africa
ZAF	DTU_2016_223_1_MG_ZAF-39	2016_pil_zaf_01	South Africa	ZA	Johannesburg	-26.21	28.05	16	2016-04-02	Global sewage consortium	wastewater	wastewater metagenome	ERS2521085	ERX2624251	ERR2607595	Illumina	paired	Illumina HiSeq 3000	Sub-Saharan Africa
ZAF	DTU_2017_512_1_MG_ZA_PR_208	2017_nov_zaf_01	South Africa	ZA	Pretoria	-25.75	28.19	17	2017-11-17	Global sewage consortium	wastewater	wastewater metagenome	ERS5186476	ERX4603805	ERR4682353	Illumina	paired	Illumina NovaSeq 6000	Sub-Saharan Africa
ZAF	DTU_2017_432_1_MG_ZA_PR	2017_jun_zaf_01	South Africa	ZA	Pretoria	-25.75	28.19	17	2017-06-05	Global sewage consortium	wastewater	wastewater metagenome	ERS2597348	ERX2697757	ERR2683143	Illumina	paired	Illumina NovaSeq 6000	Sub-Saharan Africa
ZAF	DTU_2018_800_1_MG_ZA_PR_484	2018_nov_zaf_01	South Africa	ZA	Pretoria	-25.75	28.19	18	2018-11-22	Global sewage consortium	wastewater	wastewater metagenome	ERS5184477	ERX4600183	ERR4678559	Illumina	paired	Illumina NovaSeq 6000	Sub-Saharan Africa
ZAF	DTU_2016_225_3_MG_ZAF-39_2	2016_pil_zaf_01	South Africa	ZA	Johannesburg	-26.21	28.05	16	2016-04-02	Global sewage consortium	wastewater	wastewater metagenome	ERS2521084	ERX2624250	ERR2607594	Illumina	paired	Illumina HiSeq 3000	Sub-Saharan Africa
ZAF	DTU_2018_867_1_MG_ZA_CT_551	2018_nov_zaf_02	South Africa	ZA	Tshwane	-25.75	28.19	18	2018-12-06	Global sewage consortium	wastewater	wastewater metagenome	ERS5184540	ERX4600246	ERR4678622	Illumina	paired	Illumina NovaSeq 6000	Sub-Saharan Africa
ZMB	DTU_2016_234_6_MG_ZMB-49b_5	2016_pil_zmb_02	Zambia	ZM	Kitwe	-12.81	28.21	16	2016-12-01	Global sewage consortium	wastewater	wastewater metagenome	ERS2521092	ERX2624258	ERR2607602	Illumina	paired	Illumina HiSeq 3000	Sub-Saharan Africa
ZMB	DTU_2016_227_2_MG_ZMB-49_1	2016_pil_zmb_01	Zambia	ZM	Lusaka	-15.42	28.28	16	2016-01-25	Global sewage consortium	wastewater	wastewater metagenome	ERS2521086	ERX2624252	ERR2607596	Illumina	paired	Illumina HiSeq 3000	Sub-Saharan Africa
ZMB	DTU_2016_233_5_MG_ZMB-49b_4	2016_pil_zmb_02	Zambia	ZM	Kitwe	-12.81	28.21	16	2016-12-01	Global sewage consortium	wastewater	wastewater metagenome	ERS2521091	ERX2624257	ERR2607601	Illumina	paired	Illumina HiSeq 3000	Sub-Saharan Africa
ZMB	DTU_2016_231_3_MG_ZMB-49b_2	2016_pil_zmb_02	Zambia	ZM	Kitwe	-12.81	28.21	16	2016-12-01	Global sewage consortium	wastewater	wastewater metagenome	ERS2521089	ERX2624255	ERR2607599	Illumina	paired	Illumina HiSeq 3000	Sub-Saharan Africa
ZMB	DTU_2016_235_7_MG_ZMB-49b_6	2016_pil_zmb_02	Zambia	ZM	Kitwe	-12.81	28.21	16	2016-12-01	Global sewage consortium	wastewater	wastewater metagenome	ERS2521093	ERX2624259	ERR2607603	Illumina	paired	Illumina HiSeq 3000	Sub-Saharan Africa
ZMB	DTU_2016_232_4_MG_ZMB-49b_3	2016_pil_zmb_02	Zambia	ZM	Kitwe	-12.81	28.21	16	2016-12-01	Global sewage consortium	wastewater	wastewater metagenome	ERS2521090	ERX2624256	ERR2607600	Illumina	paired	Illumina HiSeq 3000	Sub-Saharan Africa
ZMB	DTU_2016_228_3_MG_ZMB-49_2	2016_pil_zmb_01	Zambia	ZM	Lusaka	-15.42	28.28	16	2016-01-25	Global sewage consortium	wastewater	wastewater metagenome	ERS2521087	ERX2624253	ERR2607597	Illumina	paired	Illumina HiSeq 3000	Sub-Saharan Africa
ZMB	DTU_2016_226_1_MG_ZMB-49	2016_pil_zmb_01	Zambia	ZM	Lusaka	-15.42	28.28	16	2016-01-25	Global sewage consortium	wastewater	wastewater metagenome	ERS2521095	ERX2624261	ERR2607605	Illumina	paired	Illumina HiSeq 3000	Sub-Saharan Africa
ZMB	DTU_2016_229_1_MG_ZMB-49b	2016_pil_zmb_02	Zambia	ZM	Kitwe	-12.81	28.21	16	2016-12-01	Global sewage consortium	wastewater	wastewater metagenome	ERS2521094	ERX2624260	ERR2607604	Illumina	paired	Illumina HiSeq 3000	Sub-Saharan Africa
ZMB	DTU_2016_230_2_MG_ZMB-49b_1	2016_pil_zmb_02	Zambia	ZM	Kitwe	-12.81	28.21	16	2016-12-01	Global sewage consortium	wastewater	wastewater metagenome	ERS2521088	ERX2624254	ERR2607598	Illumina	paired	Illumina HiSeq 3000	Sub-Saharan Africa
PRT	DTU_2018_895_1_MG_PT_PO_582	2018_nov_prt_02	Portugal	PT	Porto	41.15	-8.61	18	2019-01-29	Global sewage consortium	wastewater	wastewater metagenome	ERS5184568	ERX4600274	ERR4678650	Illumina	paired	Illumina NovaSeq 6000	Europe & Central Asia
PRT	DTU_2017_438_1_MG_PT_PO	2017_jun_prt_02	Portugal	PT	Porto	41.15	-8.61	17	2017-06-13	Global sewage consortium	wastewater	wastewater metagenome	ERS2597355	ERX2697764	ERR2683150	Illumina	paired	Illumina NovaSeq 6000	Europe & Central Asia
PRT	DTU_2017_306_1_MG_PT_LI	2017_jun_prt_01	Portugal	PT	Lisbon	38.71	-9.14	17	2017-06-06	Global sewage consortium	wastewater	wastewater metagenome	ERS2597408	ERX2697817	ERR2683203	Illumina	paired	Illumina NovaSeq 6000	Europe & Central Asia
PRT	DTU_2017_575_1_MG_PT_PO_271	2017_nov_prt_02	Portugal	PT	Porto	41.15	-8.61	17	2017-11-22	Global sewage consortium	wastewater	wastewater metagenome	ERS5186529	ERX4603858	ERR4682406	Illumina	paired	Illumina NovaSeq 6000	Europe & Central Asia
PRT	DTU_2017_494_1_MG_PT_LI_190	2017_nov_prt_01	Portugal	PT	Lisbon	38.71	-9.14	17	2017-11-22	Global sewage consortium	wastewater	wastewater metagenome	ERS5186458	ERX4603787	ERR4682335	Illumina	paired	Illumina NovaSeq 6000	Europe & Central Asia
PRT	DTU_2018_669_1_MG_PT_LI_357	2018_jun_prt_01	Portugal	PT	Lisbon	38.71	-9.14	18	2018-06-27	Global sewage consortium	wastewater	wastewater metagenome	ERS5186651	ERX4604243	ERR4682794	Illumina	paired	Illumina NovaSeq 6000	Europe & Central Asia
PRT	DTU_2018_697_1_MG_PT_PO_386	2018_jun_prt_02	Portugal	PT	Porto	41.15	-8.61	18	2018-07-02	Global sewage consortium	wastewater	wastewater metagenome	ERS5186677	ERX4604269	ERR4682820	Illumina	paired	Illumina NovaSeq 6000	Europe & Central Asia
PRT	DTU_2018_826_1_MG_PT_LI_510	2018_nov_prt_01	Portugal	PT	Lisbon	38.71	-9.14	18	2018-12-11	Global sewage consortium	wastewater	wastewater metagenome	ERS5184502	ERX4600208	ERR4678584	Illumina	paired	Illumina NovaSeq 6000	Europe & Central Asia
GRC	DTU_2018_887_1_MG_GR_TH_574	2018_nov_grc_02	Greece	GR	Thessaloniki	40.64	22.94	18	2019-01-29	Global sewage consortium	wastewater	wastewater metagenome	ERS5184560	ERX4600266	ERR4678642	Illumina	paired	Illumina NovaSeq 6000	Europe & Central Asia
GRC	DTU_2018_825_1_MG_GR_AT_509	2018_nov_grc_01	Greece	GR	Athens	37.98	23.73	18	2018-12-07	Global sewage consortium	wastewater	wastewater metagenome	ERS5184501	ERX4600207	ERR4678583	Illumina	paired	Illumina NovaSeq 6000	Europe & Central Asia
GRC	DTU_2017_308_1_MG_GR_AT	2017_jun_grc_01	Greece	GR	Athens	37.98	23.73	17	2017-06-09	Global sewage consortium	wastewater	wastewater metagenome	ERS2597430	ERX2697839	ERR2683225	Illumina	paired	Illumina NovaSeq 6000	Europe & Central Asia
GRC	DTU_2017_963_1_MG_GR1707_L5	2017_lon_grc_01	Greece	GR	Athens	37.98	23.73	17	2017-07-31	Global sewage consortium	wastewater	wastewater metagenome	--	--	--	Illumina	paired	Illumina NovaSeq 6000	Europe & Central Asia
GRC	DTU_2017_529_1_MG_GR_TH_225	2017_nov_grc_02	Greece	GR	Thessaloniki	40.64	22.94	17	2017-11-30	Global sewage consortium	wastewater	wastewater metagenome	ERS5186489	ERX4603818	ERR4682366	Illumina	paired	Illumina NovaSeq 6000	Europe & Central Asia
GRC	DTU_2017_497_1_MG_GR_AT_193	2017_nov_grc_01	Greece	GR	Athens	37.98	23.73	17	2017-11-21	Global sewage consortium	wastewater	wastewater metagenome	ERS5186461	ERX4603790	ERR4682338	Illumina	paired	Illumina NovaSeq 6000	Europe & Central Asia
GRC	DTU_2017_964_1_MG_GR1709_L6	2017_lon_grc_02	Greece	GR	Athens	37.98	23.73	17	2017-09-29	Global sewage consortium	wastewater	wastewater metagenome	--	--	--	Illumina	paired	Illumina NovaSeq 6000	Europe & Central Asia
GRC	DTU_2018_696_1_MG_GR_TH_385	2018_jun_grc_02	Greece	GR	Thessaloniki	40.64	22.94	18	2018-07-13	Global sewage consortium	wastewater	wastewater metagenome	ERS5186676	ERX4604268	ERR4682819	Illumina	paired	Illumina NovaSeq 6000	Europe & Central Asia
GRC	DTU_2017_436_1_MG_GR_TH	2017_jun_grc_02	Greece	GR	Thessaloniki	40.64	22.94	17	2017-06-19	Global sewage consortium	wastewater	wastewater metagenome	ERS2597353	ERX2697762	ERR2683148	Illumina	paired	Illumina NovaSeq 6000	Europe & Central Asia
GRC	DTU_2018_652_1_MG_GR_AT_340	2018_jun_grc_01	Greece	GR	Athens	37.98	23.73	18	2018-06-20	Global sewage consortium	wastewater	wastewater metagenome	ERS5186635	ERX4604227	ERR4682778	Illumina	paired	Illumina NovaSeq 6000	Europe & Central Asia
GBR	DTU_2017_546_1_MG_GB_FA_242	2017_nov_gbr_02	United Kingdom	GB	Falmouth	50.16	-5.07	17	2017	Global sewage consortium	wastewater	wastewater metagenome	ERS5186506	ERX4603835	ERR4682383	Illumina	paired	Illumina NovaSeq 6000	Europe & Central Asia
GBR	DTU_2018_808_1_MG_GB_FA_492	2018_nov_gbr_01	United Kingdom	GB	Falmouth	50.16	-5.07	18	2018-11-09	Global sewage consortium	wastewater	wastewater metagenome	ERS5184485	ERX4600191	ERR4678567	Illumina	paired	Illumina NovaSeq 6000	Europe & Central Asia
GBR	DTU_2017_545_1_MG_GB_CA_241	2017_nov_gbr_01	United Kingdom	GB	Camborne	50.21	-5.3	17	2017-11-28	Global sewage consortium	wastewater	wastewater metagenome	ERS5186505	ERX4603834	ERR4682382	Illumina	paired	Illumina NovaSeq 6000	Europe & Central Asia
GBR	DTU_2018_685_1_MG_GB_CA_373	2018_jun_gbr_02	United Kingdom	GB	Camborne	50.21	-5.3	18	2018-06-21	Global sewage consortium	wastewater	wastewater metagenome	ERS5186665	ERX4604257	ERR4682808	Illumina	paired	Illumina NovaSeq 6000	Europe & Central Asia
GBR	DTU_2017_596_1_MG_GB_EB_292	2017_nov_gbr_03	United Kingdom	GB	Edinburgh	55.95	-3.19	17	2017-11-21	Global sewage consortium	wastewater	wastewater metagenome	ERS5186550	ERX4603879	ERR4682427	Illumina	paired	Illumina NovaSeq 6000	Europe & Central Asia
GBR	DTU_2017_309_1_MG_GB_FA	2017_jun_gbr_01	United Kingdom	GB	Falmouth	50.16	-5.07	17	2017-06-09	Global sewage consortium	wastewater	wastewater metagenome	ERS2597441	ERX2697850	ERR2683236	Illumina	paired	Illumina NovaSeq 6000	Europe & Central Asia
GBR	DTU_2017_607_1_MG_GB_NC_303	2017_nov_gbr_04	United Kingdom	GB	Newcastle Upon Tyne	54.97	-1.61	17	2017-12-04	Global sewage consortium	wastewater	wastewater metagenome	ERS5186561	ERX4603890	ERR4682438	Illumina	paired	Illumina NovaSeq 6000	Europe & Central Asia
GBR	DTU_2018_809_1_MG_GB_CA_493	2018_nov_gbr_02	United Kingdom	GB	Camborne	50.21	-5.3	18	2018-11-09	Global sewage consortium	wastewater	wastewater metagenome	ERS5184486	ERX4600192	ERR4678568	Illumina	paired	Illumina NovaSeq 6000	Europe & Central Asia
GBR	DTU_2018_872_1_MG_GB_EB_556	2018_nov_gbr_03	United Kingdom	GB	Edinburgh	55.95	-3.19	18	2018-11-30	Global sewage consortium	wastewater	wastewater metagenome	ERS5184545	ERX4600251	ERR4678627	Illumina	paired	Illumina NovaSeq 6000	Europe & Central Asia
GBR	DTU_2018_684_1_MG_GB_FA_372	2018_jun_gbr_01	United Kingdom	GB	Falmouth	50.16	-5.07	18	2018-06-29	Global sewage consortium	wastewater	wastewater metagenome	ERS5186664	ERX4604256	ERR4682807	Illumina	paired	Illumina NovaSeq 6000	Europe & Central Asia
GBR	DTU_2017_439_1_MG_GB_ED	2017_jun_gbr_03	United Kingdom	GB	Edinburgh	55.95	-3.19	17	2017-06-12	Global sewage consortium	wastewater	wastewater metagenome	ERS2597356	ERX2697765	ERR2683151	Illumina	paired	Illumina NovaSeq 6000	Europe & Central Asia
GBR	DTU_2017_310_1_MG_GB_CA	2017_jun_gbr_02	United Kingdom	GB	Camborne	50.21	-5.3	17	2017-06-09	Global sewage consortium	wastewater	wastewater metagenome	ERS2597452	ERX2697861	ERR2683247	Illumina	paired	Illumina NovaSeq 6000	Europe & Central Asia
GBR	DTU_2017_445_1_MG_GB_NC	2017_jun_gbr_04	United Kingdom	GB	Newcastle Upon Tyne	54.97	-1.61	17	2017-07-29	Global sewage consortium	wastewater	wastewater metagenome	ERS2597363	ERX2697772	ERR2683158	Illumina	paired	Illumina NovaSeq 6000	Europe & Central Asia
GBR	DTU_2018_734_1_MG_GB_EB_431	2018_jun_gbr_03	United Kingdom	GB	Edinburgh	55.95	-3.19	18	2018-06-27	Global sewage consortium	wastewater	wastewater metagenome	ERS5186713	ERX4604305	ERR4682856	Illumina	paired	Illumina NovaSeq 6000	Europe & Central Asia
GBR	DTU_2018_748_1_MG_GB_NC_445	2018_jun_gbr_04	United Kingdom	GB	Newcastle Upon Tyne	54.97	-1.61	18	2018-06-28	Global sewage consortium	wastewater	wastewater metagenome	ERS5186725	ERX4604317	ERR4682868	Illumina	paired	Illumina NovaSeq 6000	Europe & Central Asia
TCD	DTU_2018_802_1_MG_TD_ND_486	2018_nov_tcd_01	Chad	TD	N'Djamena	12.12	15.05	18	2018-11-18	Global sewage consortium	wastewater	wastewater metagenome	ERS5184479	ERX4600185	ERR4678561	Illumina	paired	Illumina NovaSeq 6000	Sub-Saharan Africa
TCD	DTU_2017_311_1_MG_TD_ND	2017_jun_tcd_01	Chad	TD	N'Djamena	12.12	15.05	17	2017-06-11	Global sewage consortium	wastewater	wastewater metagenome	ERS2597463	ERX2697872	ERR2683258	Illumina	paired	Illumina NovaSeq 6000	Sub-Saharan Africa
TCD	DTU_2017_541_1_MG_TD_ND_237	2017_nov_tcd_01	Chad	TD	N'Djamena	12.12	15.05	17	2017-11-26	Global sewage consortium	wastewater	wastewater metagenome	ERS5186501	ERX4603830	ERR4682378	Illumina	paired	Illumina NovaSeq 6000	Sub-Saharan Africa
CMR	DTU_2018_1021_1_MG_CM1807_L72	2018_lon_cmr_07	Cameroon	CM	Yaounde	3.87	11.52	18	2018-07-19	Global sewage consortium	wastewater	wastewater metagenome	--	--	--	Illumina	paired	Illumina NovaSeq 6000	Sub-Saharan Africa
CMR	DTU_2018_979_1_MG_CM1801_L24	2018_lon_cmr_06	Cameroon	CM	Yaounde	3.87	11.52	18	2018-01-19	Global sewage consortium	wastewater	wastewater metagenome	--	--	--	Illumina	paired	Illumina NovaSeq 6000	Sub-Saharan Africa
CMR	DTU_2018_1022_1_MG_CM1808_L73	2018_lon_cmr_08	Cameroon	CM	Yaounde	3.87	11.52	18	2018-08-17	Global sewage consortium	wastewater	wastewater metagenome	--	--	--	Illumina	paired	Illumina NovaSeq 6000	Sub-Saharan Africa
CMR	DTU_2017_595_1_MG_CM_YA_291	2017_nov_cmr_01	Cameroon	CM	Yaounde	3.87	11.52	17	2017-11-17	Global sewage consortium	wastewater	wastewater metagenome	ERS5186549	ERX4603878	ERR4682426	Illumina	paired	Illumina NovaSeq 6000	Sub-Saharan Africa
CMR	DTU_2017_978_1_MG_CM1712_L23	2017_lon_cmr_02	Cameroon	CM	Yaounde	3.87	11.52	17	2017-12-20	Global sewage consortium	wastewater	wastewater metagenome	--	--	--	Illumina	paired	Illumina NovaSeq 6000	Sub-Saharan Africa
CMR	DTU_2018_761_1_MG_CM_YA_458	2018_jun_cmr_01	Cameroon	CM	Yaounde	3.87	11.52	18	2018-06-20	Global sewage consortium	wastewater	wastewater metagenome	ERS5186737	ERX4604329	ERR4682880	Illumina	paired	Illumina NovaSeq 6000	Sub-Saharan Africa
CMR	DTU_2018_1039_1_MG_CM1804_L96	2018_lon_cmr_09	Cameroon	CM	Yaounde	3.87	11.52	18	2018-04-03	Global sewage consortium	wastewater	wastewater metagenome	--	--	--	Illumina	paired	Illumina NovaSeq 6000	Sub-Saharan Africa
CMR	DTU_2017_982_1_MG_CM1709_L27	2017_lon_cmr_05	Cameroon	CM	Yaounde	3.87	11.52	17	2017-09-19	Global sewage consortium	wastewater	wastewater metagenome	--	--	--	Illumina	paired	Illumina NovaSeq 6000	Sub-Saharan Africa
CMR	DTU_2017_980_1_MG_CM1707_L25	2017_lon_cmr_03	Cameroon	CM	Yaounde	3.87	11.52	17	2017-07-19	Global sewage consortium	wastewater	wastewater metagenome	--	--	--	Illumina	paired	Illumina NovaSeq 6000	Sub-Saharan Africa
CMR	DTU_2017_977_1_MG_CM1710_L22	2017_lon_cmr_01	Cameroon	CM	Yaounde	3.87	11.52	17	2017-10-23	Global sewage consortium	wastewater	wastewater metagenome	--	--	--	Illumina	paired	Illumina NovaSeq 6000	Sub-Saharan Africa
CMR	DTU_2019_1041_1_MG_CM1802_L98	2019_lon_cmr_12	Cameroon	CM	Yaounde	3.87	11.52	19	2019-02-21	Global sewage consortium	wastewater	wastewater metagenome	--	--	--	Illumina	paired	Illumina NovaSeq 6000	Sub-Saharan Africa
CMR	DTU_2019_1040_1_MG_CM1805_L97	2019_lon_cmr_11	Cameroon	CM	Yaounde	3.87	11.52	19	2019-05-22	Global sewage consortium	wastewater	wastewater metagenome	--	--	--	Illumina	paired	Illumina NovaSeq 6000	Sub-Saharan Africa
CMR	DTU_2017_317_1_MG_CM_YA	2017_jun_cmr_01	Cameroon	CM	Yaounde	3.87	11.52	17	2017-06-15	Global sewage consortium	wastewater	wastewater metagenome	ERS2597361	ERX2697770	ERR2683156	Illumina	paired	Illumina NovaSeq 6000	Sub-Saharan Africa
CMR	DTU_2017_981_1_MG_CM1708_L26	2017_lon_cmr_04	Cameroon	CM	Yaounde	3.87	11.52	17	2017-08-18	Global sewage consortium	wastewater	wastewater metagenome	--	--	--	Illumina	paired	Illumina NovaSeq 6000	Sub-Saharan Africa
CMR	DTU_2018_1042_1_MG_CM1803_L99	2018_lon_cmr_10	Cameroon	CM	Yaounde	3.87	11.52	18	2018-03-18	Global sewage consortium	wastewater	wastewater metagenome	--	--	--	Illumina	paired	Illumina NovaSeq 6000	Sub-Saharan Africa
CMR	DTU_2018_912_1_MG_CM_YA_597	2018_nov_cmr_01	Cameroon	CM	Yaounde	3.87	11.52	18	2018-11-23	Global sewage consortium	wastewater	wastewater metagenome	ERS5184585	ERX4600291	ERR4678667	Illumina	paired	Illumina NovaSeq 6000	Sub-Saharan Africa
HKG	DTU_2017_530_1_MG_HK_HK_226	2017_nov_hkg_01	Hong Kong	HK	Hong Kong	22.28	114.16	17	2017-11-30	Global sewage consortium	wastewater	wastewater metagenome	ERS5186490	ERX4603819	ERR4682367	Illumina	paired	Illumina NovaSeq 6000	East Asia & Pacific
HKG	DTU_2017_318_1_MG_HK_HK	2017_jun_hkg_01	Hong Kong	HK	Hong Kong	22.28	114.16	17	2017-06-23	Global sewage consortium	wastewater	wastewater metagenome	ERS2597372	ERX2697781	ERR2683167	Illumina	paired	Illumina NovaSeq 6000	East Asia & Pacific
JPN	DTU_2018_879_1_MG_JP_JP_564	2018_nov_jpn_05	Japan	JP	Anonymous	35.68	139.76	18	2018-12-19	Global sewage consortium	wastewater	wastewater metagenome	ERS5184552	ERX4600258	ERR4678634	Illumina	paired	Illumina NovaSeq 6000	East Asia & Pacific
JPN	DTU_2018_683_1_MG_JP_JP_371	2018_jun_jpn_01	Japan	JP	Japan	36.57	139.24	18	2018-06-22	Global sewage consortium	wastewater	wastewater metagenome	ERS5186663	ERX4604255	ERR4682806	Illumina	paired	Illumina NovaSeq 6000	East Asia & Pacific
JPN	DTU_2017_547_1_MG_JP_JP_243	2017_nov_jpn_01	Japan	JP	Anonymous	NA	NA	17	2017-11-27	Global sewage consortium	wastewater	wastewater metagenome	ERS5186507	ERX4603836	ERR4682384	Illumina	paired	Illumina NovaSeq 6000	East Asia & Pacific
JPN	DTU_2018_831_1_MG_JP_HI_AM_515	2018_nov_jpn_01	Japan	JP	Hiroshima	34.39	132.45	18	2018-11-21	Global sewage consortium	wastewater	wastewater metagenome	ERS5184507	ERX4600213	ERR4678589	Illumina	paired	Illumina NovaSeq 6000	East Asia & Pacific
JPN	DTU_2018_834_1_MG_JP_HI_SD_518	2018_nov_jpn_04	Japan	JP	Hiroshima	34.39	132.45	18	2018-11-21	Global sewage consortium	wastewater	wastewater metagenome	ERS5184510	ERX4600216	ERR4678592	Illumina	paired	Illumina NovaSeq 6000	East Asia & Pacific
JPN	DTU_2018_833_1_MG_JP_HI_EB_517	2018_nov_jpn_03	Japan	JP	Hiroshima	34.39	132.45	18	2018-11-21	Global sewage consortium	wastewater	wastewater metagenome	ERS5184509	ERX4600215	ERR4678591	Illumina	paired	Illumina NovaSeq 6000	East Asia & Pacific
JPN	DTU_2018_832_1_MG_JP_HI_SB_516	2018_nov_jpn_02	Japan	JP	Hiroshima	34.39	132.45	18	2018-11-21	Global sewage consortium	wastewater	wastewater metagenome	ERS5184508	ERX4600214	ERR4678590	Illumina	paired	Illumina NovaSeq 6000	East Asia & Pacific
JPN	DTU_2017_327_1_MG_JP_JP	2017_jun_jpn_01	Japan	JP	Anonymous	NA	NA	17	2017-06-12	Global sewage consortium	wastewater	wastewater metagenome	ERS2597401	ERX2697810	ERR2683196	Illumina	paired	Illumina NovaSeq 6000	East Asia & Pacific
URY	DTU_2017_597_1_MG_UY_MV_293	2017_nov_ury_01	Uruguay	UY	Montevideo	-34.91	-56.19	17	2017-12-01	Global sewage consortium	wastewater	wastewater metagenome	ERS5186551	ERX4603880	ERR4682428	Illumina	paired	Illumina NovaSeq 6000	Latin America & Caribbean
URY	DTU_2018_853_1_MG_UY_MO_537	2018_nov_ury_01	Uruguay	UY	Montevideo	-34.91	-56.19	18	2018-08-27	Global sewage consortium	wastewater	wastewater metagenome	ERS5184526	ERX4600232	ERR4678608	Illumina	paired	Illumina NovaSeq 6000	Latin America & Caribbean
URY	DTU_2017_331_1_MG_UY_MV	2017_jun_ury_01	Uruguay	UY	Montevideo	-34.91	-56.19	17	2017-06-16	Global sewage consortium	wastewater	wastewater metagenome	ERS2597405	ERX2697814	ERR2683200	Illumina	paired	Illumina NovaSeq 6000	Latin America & Caribbean
PHL	DTU_2017_344_1_MG_PH_QU	2017_jun_phl_01	Philippines	PH	Manila	14.59	120.98	17	2017-06-29	Global sewage consortium	wastewater	wastewater metagenome	ERS2597420	ERX2697829	ERR2683215	Illumina	paired	Illumina NovaSeq 6000	East Asia & Pacific
PHL	DTU_2017_621_1_MG_PH_QU_317	2017_nov_phl_01	Philippines	PH	Quezon City	14.65	121.05	17	2017-12-21	Global sewage consortium	wastewater	wastewater metagenome	ERS5186575	ERX4603904	ERR4682452	Illumina	paired	Illumina NovaSeq 6000	East Asia & Pacific
FRA	DTU_2017_506_1_MG_FR_NA_202	2017_nov_fra_01	France	FR	Nantes	47.22	-1.55	17	2017-11-20	Global sewage consortium	wastewater	wastewater metagenome	ERS5186470	ERX4603799	ERR4682347	Illumina	paired	Illumina NovaSeq 6000	Europe & Central Asia
FRA	DTU_2017_345_1_MG_FR_NA	2017_jun_fra_01	France	FR	Nantes	47.22	-1.55	17	2017-06-19	Global sewage consortium	wastewater	wastewater metagenome	ERS2597421	ERX2697830	ERR2683216	Illumina	paired	Illumina NovaSeq 6000	Europe & Central Asia
FRA	DTU_2018_806_1_MG_FR_NA_490	2018_nov_fra_01	France	FR	Nantes	47.22	-1.55	18	2018-11-08	Global sewage consortium	wastewater	wastewater metagenome	ERS5184483	ERX4600189	ERR4678565	Illumina	paired	Illumina NovaSeq 6000	Europe & Central Asia
FRA	DTU_2018_663_1_MG_FR_NA_351	2018_jun_fra_01	France	FR	Nantes	47.22	-1.55	18	2018-06-11	Global sewage consortium	wastewater	wastewater metagenome	ERS5186645	ERX4604237	ERR4682788	Illumina	paired	Illumina NovaSeq 6000	Europe & Central Asia
FRA	DTU_2017_507_1_MG_FR_SA_203	2017_nov_fra_02	France	FR	Saint Philibert	47.21	5.01	17	2017-11-22	Global sewage consortium	wastewater	wastewater metagenome	ERS5186471	ERX4603800	ERR4682348	Illumina	paired	Illumina NovaSeq 6000	Europe & Central Asia
FRA	DTU_2018_664_1_MG_FR_SA_352	2018_jun_fra_02	France	FR	Saint Philibert	47.21	5.01	18	2018-06-20	Global sewage consortium	wastewater	wastewater metagenome	ERS5186646	ERX4604238	ERR4682789	Illumina	paired	Illumina NovaSeq 6000	Europe & Central Asia
FRA	DTU_2018_807_1_MG_FR_SA_491	2018_nov_fra_02	France	FR	Saint Philibert	47.21	5.01	18	2018-11-26	Global sewage consortium	wastewater	wastewater metagenome	ERS5184484	ERX4600190	ERR4678566	Illumina	paired	Illumina NovaSeq 6000	Europe & Central Asia
FRA	DTU_2017_346_1_MG_FR_AU	2017_jun_fra_02	France	FR	Saint Philibert	47.21	5.01	17	2017-06-20	Global sewage consortium	wastewater	wastewater metagenome	ERS2597422	ERX2697831	ERR2683217	Illumina	paired	Illumina NovaSeq 6000	Europe & Central Asia
MNE	DTU_2017_356_1_MG_ME_PO	2017_jun_mne_01	Montenegro	ME	Podgorica	42.44	19.26	17	2017-06-16	Global sewage consortium	wastewater	wastewater metagenome	ERS2597433	ERX2697842	ERR2683228	Illumina	paired	Illumina NovaSeq 6000	Europe & Central Asia
MNE	DTU_2018_692_1_MG_ME_PO_381	2018_jun_mne_01	Montenegro	ME	Podgorica	42.44	19.26	18	2018-07-09	Global sewage consortium	wastewater	wastewater metagenome	ERS5186672	ERX4604264	ERR4682815	Illumina	paired	Illumina NovaSeq 6000	Europe & Central Asia
MNE	DTU_2018_910_1_MG_ME_PO_595	2018_nov_mne_01	Montenegro	ME	Podgorica	42.44	19.26	18	2019-02-08	Global sewage consortium	wastewater	wastewater metagenome	ERS5184583	ERX4600289	ERR4678665	Illumina	paired	Illumina NovaSeq 6000	Europe & Central Asia
MNE	DTU_2017_508_1_MG_ME_PO_204	2017_nov_mne_01	Montenegro	ME	Podgorica	42.44	19.26	17	2017-11-23	Global sewage consortium	wastewater	wastewater metagenome	ERS5186472	ERX4603801	ERR4682349	Illumina	paired	Illumina NovaSeq 6000	Europe & Central Asia
PRY	DTU_2017_367_1_MG_PY_AS	2017_jun_pry_02	Paraguay	PY	Asuncion	-25.28	-57.63	17	2017-06-15	Global sewage consortium	wastewater	wastewater metagenome	ERS2597445	ERX2697854	ERR2683240	Illumina	paired	Illumina NovaSeq 6000	Latin America & Caribbean
PRY	DTU_2018_762_1_MG_PY_SL_459	2018_jun_pry_01	Paraguay	PY	San Lorenzo	-25.34	-57.51	18	2018-06-28	Global sewage consortium	wastewater	wastewater metagenome	ERS5186738	ERX4604330	ERR4682881	Illumina	paired	Illumina NovaSeq 6000	Latin America & Caribbean
PRY	DTU_2017_552_1_MG_PY_SL_248	2017_nov_pry_01	Paraguay	PY	San Lorenzo	-25.34	-57.51	17	2017-11-30	Global sewage consortium	wastewater	wastewater metagenome	ERS5186512	ERX4603841	ERR4682389	Illumina	paired	Illumina NovaSeq 6000	Latin America & Caribbean
PRY	DTU_2017_455_1_MG_PY_CO	2017_jun_pry_03	Paraguay	PY	Costanera	-25.39	-54.63	17	2017-06-15	Global sewage consortium	wastewater	wastewater metagenome	ERS2597374	ERX2697783	ERR2683169	Illumina	paired	Illumina NovaSeq 6000	Latin America & Caribbean
PRY	DTU_2017_366_1_MG_PY_SL	2017_jun_pry_01	Paraguay	PY	San Lorenzo	-25.34	-57.51	17	2017-06-16	Global sewage consortium	wastewater	wastewater metagenome	ERS2597444	ERX2697853	ERR2683239	Illumina	paired	Illumina NovaSeq 6000	Latin America & Caribbean
BRB	DTU_2017_551_1_MG_BB_WO_247	2017_nov_brb_02	Barbados	BB	Worthing	13.07	-59.58	17	2017-11-23	Global sewage consortium	wastewater	wastewater metagenome	ERS5186511	ERX4603840	ERR4682388	Illumina	paired	Illumina NovaSeq 6000	Latin America & Caribbean
BRB	DTU_2017_550_1_MG_BB_BR_246	2017_nov_brb_01	Barbados	BB	Bridgetown	13.1	-59.62	17	2017-11-23	Global sewage consortium	wastewater	wastewater metagenome	ERS5186510	ERX4603839	ERR4682387	Illumina	paired	Illumina NovaSeq 6000	Latin America & Caribbean
BRB	DTU_2017_368_1_MG_BB_BR	2017_jun_brb_01	Barbados	BB	Bridgetown	13.1	-59.62	17	2017-06-15	Global sewage consortium	wastewater	wastewater metagenome	ERS2597446	ERX2697855	ERR2683241	Illumina	paired	Illumina NovaSeq 6000	Latin America & Caribbean
BRB	DTU_2018_889_1_MG_BB_BR_576	2018_nov_brb_02	Barbados	BB	Bridgetown	13.1	-59.62	18	2018-12-21	Global sewage consortium	wastewater	wastewater metagenome	ERS5184562	ERX4600268	ERR4678644	Illumina	paired	Illumina NovaSeq 6000	Latin America & Caribbean
BRB	DTU_2018_888_1_MG_BB_WO_575	2018_nov_brb_01	Barbados	BB	Worthing	13.07	-59.58	18	2018-12-21	Global sewage consortium	wastewater	wastewater metagenome	ERS5184561	ERX4600267	ERR4678643	Illumina	paired	Illumina NovaSeq 6000	Latin America & Caribbean
BRB	DTU_2017_369_1_MG_BB_WO	2017_jun_brb_02	Barbados	BB	Worthing	13.07	-59.58	17	2017-06-15	Global sewage consortium	wastewater	wastewater metagenome	ERS2597447	ERX2697856	ERR2683242	Illumina	paired	Illumina NovaSeq 6000	Latin America & Caribbean
BRB	DTU_2018_713_1_MG_BB_BR_410	2018_jun_brb_02	Barbados	BB	Bridgetown	13.1	-59.62	18	2018-07-05	Global sewage consortium	wastewater	wastewater metagenome	ERS5186693	ERX4604285	ERR4682836	Illumina	paired	Illumina NovaSeq 6000	Latin America & Caribbean
BRB	DTU_2018_712_1_MG_BB_WO_409	2018_jun_brb_01	Barbados	BB	Worthing	13.07	-59.58	18	2018-07-05	Global sewage consortium	wastewater	wastewater metagenome	ERS5186692	ERX4604284	ERR4682835	Illumina	paired	Illumina NovaSeq 6000	Latin America & Caribbean
BGD	DTU_2018_749_1_MG_BD_DH_446	2018_jun_bgd_01	Bangladesh	BD	Dhaka	23.76	90.38	18	2018-07-03	Global sewage consortium	wastewater	wastewater metagenome	ERS5186726	ERX4604318	ERR4682869	Illumina	paired	Illumina NovaSeq 6000	South Asia
BGD	DTU_2018_874_1_MG_BD_DH_558	2018_nov_bgd_01	Bangladesh	BD	Dhaka	23.76	90.38	18	2018-12-31	Global sewage consortium	wastewater	wastewater metagenome	ERS5184547	ERX4600253	ERR4678629	Illumina	paired	Illumina NovaSeq 6000	South Asia
BGD	DTU_2017_373_1_MG_BD_DH	2017_jun_bgd_01	Bangladesh	BD	Dhaka	23.76	90.38	17	2017-06-14	Global sewage consortium	wastewater	wastewater metagenome	ERS2597451	ERX2697860	ERR2683246	Illumina	paired	Illumina NovaSeq 6000	South Asia
BGD	DTU_2017_589_1_MG_BD_DH_285	2017_nov_bgd_01	Bangladesh	BD	Dhaka	23.76	90.38	17	2017-11-25	Global sewage consortium	wastewater	wastewater metagenome	ERS5186543	ERX4603872	ERR4682420	Illumina	paired	Illumina NovaSeq 6000	South Asia
MUS	DTU_2018_695_1_MG_MU_GB_384	2018_jun_mus_02	Mauritius	MU	Grand Baie	-20.01	57.58	18	2018-07-06	Global sewage consortium	wastewater	wastewater metagenome	ERS5186675	ERX4604267	ERR4682818	Illumina	paired	Illumina NovaSeq 6000	Sub-Saharan Africa
MUS	DTU_2018_694_1_MG_MU_SM_383	2018_jun_mus_01	Mauritius	MU	Saint Martin	-20.5	57.39	18	2018-07-06	Global sewage consortium	wastewater	wastewater metagenome	ERS5186674	ERX4604266	ERR4682817	Illumina	paired	Illumina NovaSeq 6000	Sub-Saharan Africa
MUS	DTU_2017_380_1_MG_MU_PL	2017_jun_mus_01	Mauritius	MU	Beau Bassin Rose-Hill	-20.23	57.47	17	2017-06-13	Global sewage consortium	wastewater	wastewater metagenome	ERS2597459	ERX2697868	ERR2683254	Illumina	paired	Illumina NovaSeq 6000	Sub-Saharan Africa
MUS	DTU_2018_858_1_MG_MU_SM_542	2018_nov_mus_01	Mauritius	MU	Saint Martin	-20.5	57.39	18	2018-12-18	Global sewage consortium	wastewater	wastewater metagenome	ERS5184531	ERX4600237	ERR4678613	Illumina	paired	Illumina NovaSeq 6000	Sub-Saharan Africa
MUS	DTU_2017_561_1_MG_MU_PL_257	2017_nov_mus_01	Mauritius	MU	Port Louis	-20.16	57.5	17	2017-12-01	Global sewage consortium	wastewater	wastewater metagenome	ERS5186520	ERX4603849	ERR4682397	Illumina	paired	Illumina NovaSeq 6000	Sub-Saharan Africa
MUS	DTU_2018_859_1_MG_MU_GB_543	2018_nov_mus_02	Mauritius	MU	Grand Baie	-20.01	57.58	18	2018-12-18	Global sewage consortium	wastewater	wastewater metagenome	ERS5184532	ERX4600238	ERR4678614	Illumina	paired	Illumina NovaSeq 6000	Sub-Saharan Africa
BIH	DTU_2017_382_1_MG_BA_BL	2017_jun_bih_01	Bosnia and Herzegovina	BA	Banja Luka	44.77	17.2	17	2017-06-13	Global sewage consortium	wastewater	wastewater metagenome	ERS2597461	ERX2697870	ERR2683256	Illumina	paired	Illumina NovaSeq 6000	Europe & Central Asia
BIH	DTU_2018_877_1_MG_BA_BL_562	2018_nov_bih_01	Bosnia and Herzegovina	BA	Banja Luka	44.77	17.2	18	2018-12-10	Global sewage consortium	wastewater	wastewater metagenome	ERS5184550	ERX4600256	ERR4678632	Illumina	paired	Illumina NovaSeq 6000	Europe & Central Asia
BIH	DTU_2017_513_1_MG_BA_BL_209	2017_nov_bih_01	Bosnia and Herzegovina	BA	Banja Luka	44.77	17.2	17	2017-11-21	Global sewage consortium	wastewater	wastewater metagenome	ERS5186477	ERX4603806	ERR4682354	Illumina	paired	Illumina NovaSeq 6000	Europe & Central Asia
BIH	DTU_2018_667_1_MG_BA_BL_355	2018_jun_bih_01	Bosnia and Herzegovina	BA	Banja Luka	44.77	17.2	18	2018-06-27	Global sewage consortium	wastewater	wastewater metagenome	ERS5186649	ERX4604241	ERR4682792	Illumina	paired	Illumina NovaSeq 6000	Europe & Central Asia
SAU	DTU_2017_389_1_MG_SA_KA	2017_jun_sau_01	Saudi Arabia	SA	Thuwal	22.28	39.11	17	2017-06-05	Global sewage consortium	wastewater	wastewater metagenome	ERS2597469	ERX2697878	ERR2683264	Illumina	paired	Illumina NovaSeq 6000	Middle East & North Africa
SAU	DTU_2018_665_1_MG_SA_KA_353	2018_jun_sau_01	Saudi Arabia	SA	Thuwal	22.28	39.11	18	2018-06-12	Global sewage consortium	wastewater	wastewater metagenome	ERS5186647	ERX4604239	ERR4682790	Illumina	paired	Illumina NovaSeq 6000	Middle East & North Africa
SAU	DTU_2017_525_1_MG_SA_KA_221	2017_nov_sau_01	Saudi Arabia	SA	Thuwal	22.28	39.11	17	2017-11-22	Global sewage consortium	wastewater	wastewater metagenome	ERS5186485	ERX4603814	ERR4682362	Illumina	paired	Illumina NovaSeq 6000	Middle East & North Africa
SAU	DTU_2018_827_1_MG_SA_KA_511	2018_nov_sau_01	Saudi Arabia	SA	Thuwal	22.28	39.11	18	2018-11-27	Global sewage consortium	wastewater	wastewater metagenome	ERS5184503	ERX4600209	ERR4678585	Illumina	paired	Illumina NovaSeq 6000	Middle East & North Africa
LCA	DTU_2017_623_1_MG_LC_CA_319	2017_nov_lca_01	Saint Lucia	LC	Castries	13.95	-60.99	17	2017	Global sewage consortium	wastewater	wastewater metagenome	ERS5186577	ERX4603906	ERR4682454	Illumina	paired	Illumina NovaSeq 6000	Latin America & Caribbean
LCA	DTU_2017_391_1_MG_LC_GR	2017_jun_lca_02	Saint Lucia	LC	Gros Islet	14.08	-60.95	17	2017-06-22	Global sewage consortium	wastewater	wastewater metagenome	ERS2597471	ERX2697880	ERR2683266	Illumina	paired	Illumina NovaSeq 6000	Latin America & Caribbean
LCA	DTU_2018_753_1_MG_LC_CA_450	2018_jun_lca_01	Saint Lucia	LC	Castries	13.95	-60.99	18	2018	Global sewage consortium	wastewater	wastewater metagenome	ERS5186730	ERX4604322	ERR4682873	Illumina	paired	Illumina NovaSeq 6000	Latin America & Caribbean
LCA	DTU_2017_624_1_MG_LC_GR_320	2017_nov_lca_02	Saint Lucia	LC	Gros Islet	14.08	-60.95	17	2017	Global sewage consortium	wastewater	wastewater metagenome	ERS5186578	ERX4603907	ERR4682455	Illumina	paired	Illumina NovaSeq 6000	Latin America & Caribbean
LCA	DTU_2017_390_1_MG_LC_CA	2017_jun_lca_01	Saint Lucia	LC	Castries	13.95	-60.99	17	2017-06-22	Global sewage consortium	wastewater	wastewater metagenome	ERS2597470	ERX2697879	ERR2683265	Illumina	paired	Illumina NovaSeq 6000	Latin America & Caribbean
LCA	DTU_2018_754_1_MG_LC_GR_451	2018_jun_lca_02	Saint Lucia	LC	Gros Islet	14.08	-60.95	18	2018	Global sewage consortium	wastewater	wastewater metagenome	ERS5186731	ERX4604323	ERR4682874	Illumina	paired	Illumina NovaSeq 6000	Latin America & Caribbean
TWN	DTU_2017_397_1_MG_TW_TA	2017_jun_twn_01	Taiwan	TW	Taipei	25.04	121.56	17	2017-06-06	Global sewage consortium	wastewater	wastewater metagenome	ERS2597478	ERX2697887	ERR2683273	Illumina	paired	Illumina NovaSeq 6000	East Asia & Pacific
TWN	DTU_2018_702_1_MG_TW_TA_390	2018_jun_twn_01	Taiwan	TW	Taipei	25.04	121.56	18	2018-07-09	Global sewage consortium	wastewater	wastewater metagenome	ERS5186682	ERX4604274	ERR4682825	Illumina	paired	Illumina NovaSeq 6000	East Asia & Pacific
TWN	DTU_2017_543_1_MG_TW_TA_239	2017_nov_twn_01	Taiwan	TW	Taipei	25.04	121.56	17	2017-11-22	Global sewage consortium	wastewater	wastewater metagenome	ERS5186503	ERX4603832	ERR4682380	Illumina	paired	Illumina NovaSeq 6000	East Asia & Pacific
TWN	DTU_2018_861_1_MG_TW_TA_545	2018_nov_twn_01	Taiwan	TW	Taipei	25.04	121.56	18	2018-12-19	Global sewage consortium	wastewater	wastewater metagenome	ERS5184534	ERX4600240	ERR4678616	Illumina	paired	Illumina NovaSeq 6000	East Asia & Pacific
MWI	DTU_2017_583_1_MG_MW_MA_279	2017_nov_mwi_03	Malawi	MW	Machinga	-14.9	35.6	17	2017-11-22	Global sewage consortium	wastewater	wastewater metagenome	ERS5186537	ERX4603866	ERR4682414	Illumina	paired	Illumina NovaSeq 6000	Sub-Saharan Africa
MWI	DTU_2017_408_1_MG_MW_BL	2017_jun_mwi_04	Malawi	MW	Blantyre	-15.79	35	17	2017-06-13	Global sewage consortium	wastewater	wastewater metagenome	ERS2597323	ERX2697732	ERR2683118	Illumina	paired	Illumina NovaSeq 6000	Sub-Saharan Africa
MWI	DTU_2017_582_1_MG_MW_CH_278	2017_nov_mwi_02	Malawi	MW	Chikwawa	-16.22	34.72	17	2017-11-21	Global sewage consortium	wastewater	wastewater metagenome	ERS5186536	ERX4603865	ERR4682413	Illumina	paired	Illumina NovaSeq 6000	Sub-Saharan Africa
MWI	DTU_2017_406_1_MG_MW_MZ	2017_jun_mwi_02	Malawi	MW	Mzuzu	-11.46	34.02	17	2017-06-17	Global sewage consortium	wastewater	wastewater metagenome	ERS2597321	ERX2697730	ERR2683116	Illumina	paired	Illumina NovaSeq 6000	Sub-Saharan Africa
MWI	DTU_2017_581_1_MG_MW_ZO_277	2017_nov_mwi_01	Malawi	MW	Zomba	-15.39	35.33	17	2017-11-22	Global sewage consortium	wastewater	wastewater metagenome	ERS5186535	ERX4603864	ERR4682412	Illumina	paired	Illumina NovaSeq 6000	Sub-Saharan Africa
MWI	DTU_2017_405_1_MG_MW_KA	2017_jun_mwi_01	Malawi	MW	Kasungu	-12.99	33.47	17	2017-06-17	Global sewage consortium	wastewater	wastewater metagenome	ERS2597320	ERX2697729	ERR2683115	Illumina	paired	Illumina NovaSeq 6000	Sub-Saharan Africa
MWI	DTU_2017_587_1_MG_MW_KA_283	2017_nov_mwi_06	Malawi	MW	Karonga	-10.08	33.87	17	2017-11-24	Global sewage consortium	wastewater	wastewater metagenome	ERS5186541	ERX4603870	ERR4682418	Illumina	paired	Illumina NovaSeq 6000	Sub-Saharan Africa
MWI	DTU_2017_586_1_MG_MW_LI_282	2017_nov_mwi_05	Malawi	MW	Lilongwe	-13.99	33.77	17	2017-11-23	Global sewage consortium	wastewater	wastewater metagenome	ERS5186540	ERX4603869	ERR4682417	Illumina	paired	Illumina NovaSeq 6000	Sub-Saharan Africa
MWI	DTU_2017_407_1_MG_MW_ZO	2017_jun_mwi_03	Malawi	MW	Zomba	-15.39	35.33	17	2017-06-13	Global sewage consortium	wastewater	wastewater metagenome	ERS2597322	ERX2697731	ERR2683117	Illumina	paired	Illumina NovaSeq 6000	Sub-Saharan Africa
MWI	DTU_2017_588_1_MG_MW_NS_284	2017_nov_mwi_07	Malawi	MW	Nsanje	-16.72	35.1	17	2017-11-21	Global sewage consortium	wastewater	wastewater metagenome	ERS5186542	ERX4603871	ERR4682419	Illumina	paired	Illumina NovaSeq 6000	Sub-Saharan Africa
MWI	DTU_2017_584_1_MG_MW_MC_280	2017_nov_mwi_04	Malawi	MW	Mchinji	-13.78	33.01	17	2017-11-23	Global sewage consortium	wastewater	wastewater metagenome	ERS5186538	ERX4603867	ERR4682415	Illumina	paired	Illumina NovaSeq 6000	Sub-Saharan Africa
NIC	DTU_2017_423_1_MG_NI_MS	2017_jun_nic_04	Nicaragua	NI	Masaya	12	-86.05	17	2017-07-02	Global sewage consortium	wastewater	wastewater metagenome	ERS2597338	ERX2697747	ERR2683133	Illumina	paired	Illumina NovaSeq 6000	Latin America & Caribbean
NIC	DTU_2017_498_1_MG_NI_LE_194	2017_nov_nic_01	Nicaragua	NI	Leon	12.33	-86.95	17	2017-11-21	Global sewage consortium	wastewater	wastewater metagenome	ERS5186462	ERX4603791	ERR4682339	Illumina	paired	Illumina NovaSeq 6000	Latin America & Caribbean
NIC	DTU_2017_420_1_MG_NI_MN	2017_jun_nic_01	Nicaragua	NI	Managua	12.15	-86.27	17	2017-06-29	Global sewage consortium	wastewater	wastewater metagenome	ERS2597335	ERX2697744	ERR2683130	Illumina	paired	Illumina NovaSeq 6000	Latin America & Caribbean
NIC	DTU_2017_422_1_MG_NI_GR	2017_jun_nic_03	Nicaragua	NI	Granada	11.81	-85.9	17	2017-07-02	Global sewage consortium	wastewater	wastewater metagenome	ERS2597337	ERX2697746	ERR2683132	Illumina	paired	Illumina NovaSeq 6000	Latin America & Caribbean
NIC	DTU_2017_421_1_MG_NI_MT	2017_jun_nic_02	Nicaragua	NI	Matagalpa	12.96	-85.5	17	2017-06-25	Global sewage consortium	wastewater	wastewater metagenome	ERS2597336	ERX2697745	ERR2683131	Illumina	paired	Illumina NovaSeq 6000	Latin America & Caribbean
EST	DTU_2017_427_1_MG_EE_PR	2017_jun_est_03	Estonia	EE	Parnu	58.38	24.51	17	2017-06-13	Global sewage consortium	wastewater	wastewater metagenome	ERS2597343	ERX2697752	ERR2683138	Illumina	paired	Illumina NovaSeq 6000	Europe & Central Asia
EST	DTU_2017_428_1_MG_EE_NA	2017_jun_est_04	Estonia	EE	Narva	59.38	28.2	17	2017-06-07	Global sewage consortium	wastewater	wastewater metagenome	ERS2597344	ERX2697753	ERR2683139	Illumina	paired	Illumina NovaSeq 6000	Europe & Central Asia
EST	DTU_2017_571_1_MG_EE_NA_267	2017_nov_est_04	Estonia	EE	Narva	59.38	28.2	17	2017-11-22	Global sewage consortium	wastewater	wastewater metagenome	ERS5186525	ERX4603854	ERR4682402	Illumina	paired	Illumina NovaSeq 6000	Europe & Central Asia
EST	DTU_2017_568_1_MG_EE_TL_264	2017_nov_est_01	Estonia	EE	Tallinn	59.43	24.74	17	2017-12-09	Global sewage consortium	wastewater	wastewater metagenome	ERS5186522	ERX4603851	ERR4682399	Illumina	paired	Illumina NovaSeq 6000	Europe & Central Asia
EST	DTU_2017_569_1_MG_EE_TA_265	2017_nov_est_02	Estonia	EE	Tartu	58.37	26.73	17	2017-11-20	Global sewage consortium	wastewater	wastewater metagenome	ERS5186523	ERX4603852	ERR4682400	Illumina	paired	Illumina NovaSeq 6000	Europe & Central Asia
EST	DTU_2017_425_1_MG_EE_TA	2017_jun_est_01	Estonia	EE	Tartu	58.37	26.73	17	2017-06-19	Global sewage consortium	wastewater	wastewater metagenome	ERS2597341	ERX2697750	ERR2683136	Illumina	paired	Illumina NovaSeq 6000	Europe & Central Asia
EST	DTU_2017_570_1_MG_EE_PA_266	2017_nov_est_03	Estonia	EE	Parnu	58.38	24.51	17	2017-11-28	Global sewage consortium	wastewater	wastewater metagenome	ERS5186524	ERX4603853	ERR4682401	Illumina	paired	Illumina NovaSeq 6000	Europe & Central Asia
EST	DTU_2017_426_1_MG_EE_TL	2017_jun_est_02	Estonia	EE	Tallinn	59.43	24.74	17	2017-06-19	Global sewage consortium	wastewater	wastewater metagenome	ERS2597342	ERX2697751	ERR2683137	Illumina	paired	Illumina NovaSeq 6000	Europe & Central Asia
THA	DTU_2017_429_1_MG_TH_PA	2017_jun_tha_01	Thailand	TH	Pathum Thani	14.1	100.63	17	2017-06-15	Global sewage consortium	wastewater	wastewater metagenome	ERS2597345	ERX2697754	ERR2683140	Illumina	paired	Illumina NovaSeq 6000	East Asia & Pacific
THA	DTU_2018_774_1_MG_TH_PA_471	2018_jun_tha_01	Thailand	TH	Pathum Thani	14.1	100.63	18	2018-09-10	Global sewage consortium	wastewater	wastewater metagenome	ERS5186746	ERX4604338	ERR4682889	Illumina	paired	Illumina NovaSeq 6000	East Asia & Pacific
THA	DTU_2017_549_1_MG_TH_PA_245	2017_nov_tha_02	Thailand	TH	Pathum Thani	14.1	100.63	17	2017-11-23	Global sewage consortium	wastewater	wastewater metagenome	ERS5186509	ERX4603838	ERR4682386	Illumina	paired	Illumina NovaSeq 6000	East Asia & Pacific
THA	DTU_2018_829_1_MG_TH_PA_513	2018_nov_tha_01	Thailand	TH	Pathum Thani	14.1	100.63	18	2018-12-07	Global sewage consortium	wastewater	wastewater metagenome	ERS5184505	ERX4600211	ERR4678587	Illumina	paired	Illumina NovaSeq 6000	East Asia & Pacific
THA	DTU_2017_488_1_MG_TH_ST_184	2017_nov_tha_01	Thailand	TH	Surat Thani	9.47	98.83	17	2017-11-06	Global sewage consortium	wastewater	wastewater metagenome	ERS5186452	ERX4603781	ERR4682329	Illumina	paired	Illumina NovaSeq 6000	East Asia & Pacific
KOR	DTU_2018_865_1_MG_KR_GW_549	2018_nov_kor_02	South Korea	KR	Gwangju	35.16	126.85	18	2018-12-03	Global sewage consortium	wastewater	wastewater metagenome	ERS5184538	ERX4600244	ERR4678620	Illumina	paired	Illumina NovaSeq 6000	East Asia & Pacific
KOR	DTU_2017_521_1_MG_KR_DA_217	2017_nov_kor_01	South Korea	KR	Daejeon	36.35	127.38	17	2017-11-23	Global sewage consortium	wastewater	wastewater metagenome	ERS5186481	ERX4603810	ERR4682358	Illumina	paired	Illumina NovaSeq 6000	East Asia & Pacific
KOR	DTU_2017_435_1_MG_KR_GW	2017_jun_kor_01	South Korea	KR	Gwangju	35.16	126.85	17	2017-06-15	Global sewage consortium	wastewater	wastewater metagenome	ERS2597352	ERX2697761	ERR2683147	Illumina	paired	Illumina NovaSeq 6000	East Asia & Pacific
KOR	DTU_2018_680_1_MG_KR_DA_368	2018_jun_kor_01	South Korea	KR	Daejeon	36.35	127.38	18	2018-06	Global sewage consortium	wastewater	wastewater metagenome	ERS5186660	ERX4604252	ERR4682803	Illumina	paired	Illumina NovaSeq 6000	East Asia & Pacific
KOR	DTU_2018_693_1_MG_KR_GW_382	2018_jun_kor_02	South Korea	KR	Gwangju	35.16	126.85	18	2018-07-10	Global sewage consortium	wastewater	wastewater metagenome	ERS5186673	ERX4604265	ERR4682816	Illumina	paired	Illumina NovaSeq 6000	East Asia & Pacific
KOR	DTU_2018_845_1_MG_KR_DA_529	2018_nov_kor_01	South Korea	KR	Daejeon	36.35	127.38	18	2018	Global sewage consortium	wastewater	wastewater metagenome	ERS5184518	ERX4600224	ERR4678600	Illumina	paired	Illumina NovaSeq 6000	East Asia & Pacific
KOR	DTU_2017_576_1_MG_KR_GW_272	2017_nov_kor_02	South Korea	KR	Gwangju	35.16	126.85	17	2017-11-20	Global sewage consortium	wastewater	wastewater metagenome	ERS5186530	ERX4603859	ERR4682407	Illumina	paired	Illumina NovaSeq 6000	East Asia & Pacific
UGA	DTU_2017_531_1_MG_UG_KA_227	2017_nov_uga_01	Uganda	UG	Kampala	0.32	32.58	17	2017-12-01	Global sewage consortium	wastewater	wastewater metagenome	ERS5186491	ERX4603820	ERR4682368	Illumina	paired	Illumina NovaSeq 6000	Sub-Saharan Africa
UGA	DTU_2018_856_1_MG_UG_KA_540	2018_nov_uga_01	Uganda	UG	Kampala	0.32	32.58	18	2019-01-10	Global sewage consortium	wastewater	wastewater metagenome	ERS5184529	ERX4600235	ERR4678611	Illumina	paired	Illumina NovaSeq 6000	Sub-Saharan Africa
UGA	DTU_2017_447_1_MG_UG_KA	2017_jun_uga_01	Uganda	UG	Kampala	0.32	32.58	17	2017-06-19	Global sewage consortium	wastewater	wastewater metagenome	ERS2597365	ERX2697774	ERR2683160	Illumina	paired	Illumina NovaSeq 6000	Sub-Saharan Africa
UGA	DTU_2018_723_1_MG_UG_KA_420	2018_jun_uga_01	Uganda	UG	Kampala	0.32	32.58	18	2018-07-18	Global sewage consortium	wastewater	wastewater metagenome	ERS5186702	ERX4604294	ERR4682845	Illumina	paired	Illumina NovaSeq 6000	Sub-Saharan Africa
BFA	DTU_2017_453_1_MG_BF_BO	2017_jun_bfa_02	Burkina Faso	BF	Bobo Dioulasso	11.18	-4.3	17	2017-06-16	Global sewage consortium	wastewater	wastewater metagenome	ERS2597371	ERX2697780	ERR2683166	Illumina	paired	Illumina NovaSeq 6000	Sub-Saharan Africa
BFA	DTU_2017_452_1_MG_BF_OU	2017_jun_bfa_01	Burkina Faso	BF	Ouagadougou	12.37	-1.53	17	2017-06-13	Global sewage consortium	wastewater	wastewater metagenome	ERS2597370	ERX2697779	ERR2683165	Illumina	paired	Illumina NovaSeq 6000	Sub-Saharan Africa
BFA	DTU_2017_578_1_MG_BF_BO_274	2017_nov_bfa_02	Burkina Faso	BF	Bobo Dioulasso	11.18	-4.3	17	2017-12-19	Global sewage consortium	wastewater	wastewater metagenome	ERS5186532	ERX4603861	ERR4682409	Illumina	paired	Illumina NovaSeq 6000	Sub-Saharan Africa
BFA	DTU_2017_577_1_MG_BF_OU_273	2017_nov_bfa_01	Burkina Faso	BF	Ouagadougou	12.37	-1.53	17	2018-01-04	Global sewage consortium	wastewater	wastewater metagenome	ERS5186531	ERX4603860	ERR4682408	Illumina	paired	Illumina NovaSeq 6000	Sub-Saharan Africa
BFA	DTU_2018_668_1_MG_BF_OU_356	2018_jun_bfa_01	Burkina Faso	BF	Ouagadougou	12.37	-1.53	18	2018-06-22	Global sewage consortium	wastewater	wastewater metagenome	ERS5186650	ERX4604242	ERR4682793	Illumina	paired	Illumina NovaSeq 6000	Sub-Saharan Africa
GTM	DTU_2018_810_1_MG_GT_GU_494	2018_nov_gtm_01	Guatemala	GT	Guatemala City	14.62	-90.52	18	2018-11-16	Global sewage consortium	wastewater	wastewater metagenome	ERS5184487	ERX4600193	ERR4678569	Illumina	paired	Illumina NovaSeq 6000	Latin America & Caribbean
GTM	DTU_2017_458_1_MG_GT_GU	2017_jun_gtm_01	Guatemala	GT	Guatemala City	14.62	-90.52	17	2017-06-15	Global sewage consortium	wastewater	wastewater metagenome	ERS2597377	ERX2697786	ERR2683172	Illumina	paired	Illumina NovaSeq 6000	Latin America & Caribbean
GTM	DTU_2017_511_1_MG_GT_GU_207	2017_nov_gtm_01	Guatemala	GT	San Miguel Petapa	14.51	-90.55	17	2017-11-20	Global sewage consortium	wastewater	wastewater metagenome	ERS5186475	ERX4603804	ERR4682352	Illumina	paired	Illumina NovaSeq 6000	Latin America & Caribbean
LTU	DTU_2017_459_1_MG_LT_VI	2017_jun_ltu_01	Lithuania	LT	Vilnius	54.69	25.28	17	2017-08-02	Global sewage consortium	wastewater	wastewater metagenome	ERS2597378	ERX2697787	ERR2683173	Illumina	paired	Illumina NovaSeq 6000	Europe & Central Asia
MAR	DTU_2017_466_1_MG_MA_CA	2017_jun_mar_01	Morocco	MA	Casablanca	33.6	-7.62	17	2017-07-17	Global sewage consortium	wastewater	wastewater metagenome	ERS2597386	ERX2697795	ERR2683181	Illumina	paired	Illumina NovaSeq 6000	Middle East & North Africa
MAR	DTU_2017_600_1_MG_MA_CA_296	2017_nov_mar_01	Morocco	MA	Casablanca	33.6	-7.62	17	2017-11-29	Global sewage consortium	wastewater	wastewater metagenome	ERS5186554	ERX4603883	ERR4682431	Illumina	paired	Illumina NovaSeq 6000	Middle East & North Africa
MAR	DTU_2018_892_1_MG_MA_CA_579	2018_nov_mar_01	Morocco	MA	Casablanca	33.6	-7.62	18	2018	Global sewage consortium	wastewater	wastewater metagenome	ERS5184565	ERX4600271	ERR4678647	Illumina	paired	Illumina NovaSeq 6000	Middle East & North Africa
MAR	DTU_2018_710_1_MG_MA_CA_398	2018_jun_mar_01	Morocco	MA	Casablanca	33.6	-7.62	18	2018-06-29	Global sewage consortium	wastewater	wastewater metagenome	ERS5186690	ERX4604282	ERR4682833	Illumina	paired	Illumina NovaSeq 6000	Middle East & North Africa
BEL	DTU_2017_504_1_MG_BE_AN_200	2017_nov_bel_03	Belgium	BE	Antwerp South	51.22	4.4	17	2017-11-21	Global sewage consortium	wastewater	wastewater metagenome	ERS5186468	ERX4603797	ERR4682345	Illumina	paired	Illumina NovaSeq 6000	Europe & Central Asia
BEL	DTU_2018_850_1_MG_BE_GH_534	2018_nov_bel_05	Belgium	BE	Ghent	51.05	3.73	18	2018-12-05	Global sewage consortium	wastewater	wastewater metagenome	ERS5184523	ERX4600229	ERR4678605	Illumina	paired	Illumina NovaSeq 6000	Europe & Central Asia
BEL	DTU_2017_503_1_MG_BE_BR_199	2017_nov_bel_02	Belgium	BE	Bruges	51.21	3.23	17	2017-11-22	Global sewage consortium	wastewater	wastewater metagenome	ERS5186467	ERX4603796	ERR4682344	Illumina	paired	Illumina NovaSeq 6000	Europe & Central Asia
BEL	DTU_2017_505_1_MG_BE_DE_201	2017_nov_bel_04	Belgium	BE	Deurne	51.21	4.47	17	2017-11-22	Global sewage consortium	wastewater	wastewater metagenome	ERS5186469	ERX4603798	ERR4682346	Illumina	paired	Illumina NovaSeq 6000	Europe & Central Asia
BEL	DTU_2018_846_1_MG_BE_OS_530	2018_nov_bel_01	Belgium	BE	Ostend	51.23	2.92	18	2018-12-09	Global sewage consortium	wastewater	wastewater metagenome	ERS5184519	ERX4600225	ERR4678601	Illumina	paired	Illumina NovaSeq 6000	Europe & Central Asia
BEL	DTU_2018_847_1_MG_BE_LE_531	2018_nov_bel_02	Belgium	BE	Leuven	50.88	4.7	18	2018-12-12	Global sewage consortium	wastewater	wastewater metagenome	ERS5184520	ERX4600226	ERR4678602	Illumina	paired	Illumina NovaSeq 6000	Europe & Central Asia
BEL	DTU_2017_562_1_MG_BE_BR_258	2017_nov_bel_05	Belgium	BE	Brussels	50.84	4.37	17	2017-11-23	Global sewage consortium	wastewater	wastewater metagenome	ERS5186521	ERX4603850	ERR4682398	Illumina	paired	Illumina NovaSeq 6000	Europe & Central Asia
BEL	DTU_2018_849_1_MG_BE_DE_533	2018_nov_bel_04	Belgium	BE	Deurne	51.21	4.47	18	2018-12-05	Global sewage consortium	wastewater	wastewater metagenome	ERS5184522	ERX4600228	ERR4678604	Illumina	paired	Illumina NovaSeq 6000	Europe & Central Asia
BEL	DTU_2017_502_1_MG_BE_GE_198	2017_nov_bel_01	Belgium	BE	Ghent	51.05	3.73	17	2017-11-22	Global sewage consortium	wastewater	wastewater metagenome	ERS5186466	ERX4603795	ERR4682343	Illumina	paired	Illumina NovaSeq 6000	Europe & Central Asia
BEL	DTU_2018_848_1_MG_BE_BRU_532	2018_nov_bel_03	Belgium	BE	Bruges	51.21	3.23	18	2018-12-05	Global sewage consortium	wastewater	wastewater metagenome	ERS5184521	ERX4600227	ERR4678603	Illumina	paired	Illumina NovaSeq 6000	Europe & Central Asia
BEL	DTU_2018_657_1_MG_BE_HA_345	2018_jun_bel_03	Belgium	BE	Harelbeke	50.84	3.31	18	2018-06-12	Global sewage consortium	wastewater	wastewater metagenome	ERS5186640	ERX4604232	ERR4682783	Illumina	paired	Illumina NovaSeq 6000	Europe & Central Asia
BEL	DTU_2018_655_1_MG_BE_OS_343	2018_jun_bel_01	Belgium	BE	Ostend	51.23	2.92	18	2018-06-12	Global sewage consortium	wastewater	wastewater metagenome	ERS5186638	ERX4604230	ERR4682781	Illumina	paired	Illumina NovaSeq 6000	Europe & Central Asia
BEL	DTU_2018_656_1_MG_BE_LE_344	2018_jun_bel_02	Belgium	BE	Leuven	50.88	4.7	18	2018-06-20	Global sewage consortium	wastewater	wastewater metagenome	ERS5186639	ERX4604231	ERR4682782	Illumina	paired	Illumina NovaSeq 6000	Europe & Central Asia
BEN	DTU_2018_747_1_MG_BJ_DJ_444	2018_jun_ben_01	Benin	BJ	Djeffa	6.39	2.57	18	2018-08-22	Global sewage consortium	wastewater	wastewater metagenome	ERS5186724	ERX4604316	ERR4682867	Illumina	paired	Illumina NovaSeq 6000	Sub-Saharan Africa
BEN	DTU_2017_519_1_MG_BJ_SB_215	2017_nov_ben_01	Benin	BJ	Cotonou	6.37	2.43	17	2017-11-11	Global sewage consortium	wastewater	wastewater metagenome	ERS5186480	ERX4603809	ERR4682357	Illumina	paired	Illumina NovaSeq 6000	Sub-Saharan Africa
GRL	DTU_2017_542_1_MG_GL_SI_238	2017_nov_grl_01	Greenland	GL	Sisimiut	66.94	-53.67	17	2017-11-30	Global sewage consortium	wastewater	wastewater metagenome	ERS5186502	ERX4603831	ERR4682379	Illumina	paired	Illumina NovaSeq 6000	Europe & Central Asia
GRL	DTU_2018_743_1_MG_GL_SI_440	2018_jun_grl_01	Greenland	GL	Sisimiut	66.94	-53.67	18	2018-06-26	Global sewage consortium	wastewater	wastewater metagenome	ERS5186722	ERX4604314	ERR4682865	Illumina	paired	Illumina NovaSeq 6000	Europe & Central Asia
GRL	DTU_2018_920_1_MG_GL_SI_604	2018_nov_grl_01	Greenland	GL	Sisimiut	66.94	-53.67	18	2018-11-08	Global sewage consortium	wastewater	wastewater metagenome	ERS5184593	ERX4600299	ERR4678675	Illumina	paired	Illumina NovaSeq 6000	Europe & Central Asia
COL	DTU_2018_772_1_MG_CO_MO_469	2018_jun_col_01	Colombia	CO	Bogota-Mosquera	4.65	-74.2	18	2018-09-17	Global sewage consortium	wastewater	wastewater metagenome	ERS5186744	ERX4604336	ERR4682887	Illumina	paired	Illumina NovaSeq 6000	Latin America & Caribbean
COL	DTU_2017_579_1_MG_CO_MO_275	2017_nov_col_01	Colombia	CO	Mosquera	4.68	-74.23	17	2017-12-28	Global sewage consortium	wastewater	wastewater metagenome	ERS5186533	ERX4603862	ERR4682410	Illumina	paired	Illumina NovaSeq 6000	Latin America & Caribbean
COL	DTU_2018_933_1_MG_CO_MO_615	2018_nov_col_01	Colombia	CO	Mosquera	4.68	-74.23	18	2019-04-25	Global sewage consortium	wastewater	wastewater metagenome	ERS5184602	ERX4600308	ERR4678684	Illumina	paired	Illumina NovaSeq 6000	Latin America & Caribbean
KWT	DTU_2017_590_1_MG_KW_KW_286	2017_nov_kwt_01	Kuwait	KW	Kuwait	29.27	47.5	17	2017-12-07	Global sewage consortium	wastewater	wastewater metagenome	ERS5186544	ERX4603873	ERR4682421	Illumina	paired	Illumina NovaSeq 6000	Middle East & North Africa
KWT	DTU_2018_709_1_MG_KW_KW_397	2018_jun_kwt_01	Kuwait	KW	Kuwait	29.27	47.5	18	2018-07-07	Global sewage consortium	wastewater	wastewater metagenome	ERS5186689	ERX4604281	ERR4682832	Illumina	paired	Illumina NovaSeq 6000	Middle East & North Africa
CHL	DTU_2018_737_1_MG_CL_SA_434	2018_jun_chl_01	Chile	CL	Santiago	-33.44	-70.65	18	2018-08-14	Global sewage consortium	wastewater	wastewater metagenome	ERS5186716	ERX4604308	ERR4682859	Illumina	paired	Illumina NovaSeq 6000	Latin America & Caribbean
CHL	DTU_2017_598_1_MG_CL_SA_294	2017_nov_chl_01	Chile	CL	Santiago	-33.44	-70.65	17	2017-12-04	Global sewage consortium	wastewater	wastewater metagenome	ERS5186552	ERX4603881	ERR4682429	Illumina	paired	Illumina NovaSeq 6000	Latin America & Caribbean
CHL	DTU_2018_885_1_MG_CL_SA_2_572	2018_nov_chl_02	Chile	CL	Santiago	-33.44	-70.65	18	2019-01-24	Global sewage consortium	wastewater	wastewater metagenome	ERS5184558	ERX4600264	ERR4678640	Illumina	paired	Illumina NovaSeq 6000	Latin America & Caribbean
CHL	DTU_2017_599_1_MG_CL_PA_295	2017_nov_chl_02	Chile	CL	Punta Arenas	-53.16	-70.91	17	2017-11-29	Global sewage consortium	wastewater	wastewater metagenome	ERS5186553	ERX4603882	ERR4682430	Illumina	paired	Illumina NovaSeq 6000	Latin America & Caribbean
CHL	DTU_2018_884_1_MG_CL_SA_571	2018_nov_chl_01	Chile	CL	Valparaiso	-33.05	-71.62	18	2019-01-24	Global sewage consortium	wastewater	wastewater metagenome	ERS5184557	ERX4600263	ERR4678639	Illumina	paired	Illumina NovaSeq 6000	Latin America & Caribbean
CHL	DTU_2018_738_1_MG_CL_SA_2_435	2018_jun_chl_02	Chile	CL	Santiago	-33.44	-70.65	18	2018-08-14	Global sewage consortium	wastewater	wastewater metagenome	ERS5186717	ERX4604309	ERR4682860	Illumina	paired	Illumina NovaSeq 6000	Latin America & Caribbean
ARE	DTU_2017_612_1_MG_AE_AD_308	2017_nov_are_01	United Arab Emirates	AE	Dubai	25.07	55.17	17	2017-11-28	Global sewage consortium	wastewater	wastewater metagenome	ERS5186566	ERX4603895	ERR4682443	Illumina	paired	Illumina NovaSeq 6000	Middle East & North Africa
ARE	DTU_2018_780_1_MG_AE_DU_477	2018_jun_are_01	United Arab Emirates	AE	Dubai	25.07	55.17	18	2018-06-27	Global sewage consortium	wastewater	wastewater metagenome	ERS5186752	ERX4604344	ERR4682895	Illumina	paired	Illumina NovaSeq 6000	Middle East & North Africa
ARE	DTU_2018_930_1_MG_AE_DU_613	2018_nov_are_01	United Arab Emirates	AE	Dubai	25.07	55.17	18	2018-12-10	Global sewage consortium	wastewater	wastewater metagenome	ERS5184599	ERX4600305	ERR4678681	Illumina	paired	Illumina NovaSeq 6000	Middle East & North Africa
ARG	DTU_2018_909_1_MG_AR_BA_594	2018_nov_arg_01	Argentina	AR	Buenos Aires	-34.61	-58.44	18	2018-12-08	Global sewage consortium	wastewater	wastewater metagenome	ERS5184582	ERX4600288	ERR4678664	Illumina	paired	Illumina NovaSeq 6000	Latin America & Caribbean
ARG	DTU_2018_722_1_MG_AR_BA_419	2018_jun_arg_01	Argentina	AR	Buenos Aires	-34.61	-58.44	18	2018-07-10	Global sewage consortium	wastewater	wastewater metagenome	ERS5186701	ERX4604293	ERR4682844	Illumina	paired	Illumina NovaSeq 6000	Latin America & Caribbean
ARG	DTU_2017_622_1_MG_AR_BA_318	2017_nov_arg_01	Argentina	AR	Buenos Aires	-34.61	-58.44	17	2017-11-22	Global sewage consortium	wastewater	wastewater metagenome	ERS5186576	ERX4603905	ERR4682453	Illumina	paired	Illumina NovaSeq 6000	Latin America & Caribbean
MOZ	DTU_2017_628_1_MG_MZ_MA_324	2017_nov_moz_01	Mozambique	MZ	Maputo	-25.97	32.57	17	2017-11-17	Global sewage consortium	wastewater	wastewater metagenome	ERS5186582	ERX4603911	ERR4682459	Illumina	paired	Illumina NovaSeq 6000	Sub-Saharan Africa
MOZ	DTU_2018_906_1_MG_MZ_MA_591	2018_nov_moz_01	Mozambique	MZ	Maputo	-25.97	32.57	18	2018-12-13	Global sewage consortium	wastewater	wastewater metagenome	ERS5184579	ERX4600285	ERR4678661	Illumina	paired	Illumina NovaSeq 6000	Sub-Saharan Africa
MDG	DTU_2018_855_1_MG_MG_AN_3_539	2018_nov_mdg_02	Madagascar	MG	Lake Anosy	-24.06	46.26	18	2018-11-21	Global sewage consortium	wastewater	wastewater metagenome	ERS5184528	ERX4600234	ERR4678610	Illumina	paired	Illumina NovaSeq 6000	Sub-Saharan Africa
MDG	DTU_2018_765_1_MG_MG_AN_462	2018_jun_mdg_01	Madagascar	MG	Antananarivo	-18.91	47.53	18	2018-06-27	Global sewage consortium	wastewater	wastewater metagenome	ERS5186741	ERX4604333	ERR4682884	Illumina	paired	Illumina NovaSeq 6000	Sub-Saharan Africa
MDG	DTU_2018_766_1_MG_MG_AN_1_463	2018_jun_mdg_02	Madagascar	MG	Antananarivo	-18.91	47.53	18	2018-06-28	Global sewage consortium	wastewater	wastewater metagenome	ERS5186742	ERX4604334	ERR4682885	Illumina	paired	Illumina NovaSeq 6000	Sub-Saharan Africa
MDG	DTU_2018_773_1_MG_MG_AN_2_470	2018_jun_mdg_03	Madagascar	MG	Antananarivo	-18.91	47.53	18	2018-09-24	Global sewage consortium	wastewater	wastewater metagenome	ERS5186745	ERX4604337	ERR4682888	Illumina	paired	Illumina NovaSeq 6000	Sub-Saharan Africa
MDG	DTU_2018_813_1_MG_MG_AN_497	2018_nov_mdg_01	Madagascar	MG	Antananarivo	-18.91	47.53	18	2018-12-05	Global sewage consortium	wastewater	wastewater metagenome	ERS5184489	ERX4600195	ERR4678571	Illumina	paired	Illumina NovaSeq 6000	Sub-Saharan Africa
MDG	DTU_2018_857_1_MG_MG_AN_4_541	2018_nov_mdg_03	Madagascar	MG	Canal Andriantany	-18.91	47.52	18	2018-11-21	Global sewage consortium	wastewater	wastewater metagenome	ERS5184530	ERX4600236	ERR4678612	Illumina	paired	Illumina NovaSeq 6000	Sub-Saharan Africa
BOL	DTU_2018_870_1_MG_BO_LP_554	2018_nov_bol_01	Bolivia	BO	La Paz City	-16.5	-68.13	18	2019-01-15	Global sewage consortium	wastewater	wastewater metagenome	ERS5184543	ERX4600249	ERR4678625	Illumina	paired	Illumina NovaSeq 6000	Latin America & Caribbean
COD	DTU_2018_936_1_MG_CO_BU_2_618	2018_nov_cod_02	Democratic Republic of the Congo	CD	Bukavu	-11.64	27.52	18	2018-11-17	Global sewage consortium	wastewater	wastewater metagenome	ERS5184604	ERX4600310	ERR4678686	Illumina	paired	Illumina NovaSeq 6000	Sub-Saharan Africa
COD	DTU_2018_937_1_MG_CO_BU_3_619	2018_nov_cod_03	Democratic Republic of the Congo	CD	Bukavu	-11.64	27.52	18	2018-11-17	Global sewage consortium	wastewater	wastewater metagenome	ERS5184605	ERX4600311	ERR4678687	Illumina	paired	Illumina NovaSeq 6000	Sub-Saharan Africa
COD	DTU_2018_938_1_MG_CO_BU_4_620	2018_nov_cod_04	Democratic Republic of the Congo	CD	Bukavu	-11.64	27.52	18	2018-11-17	Global sewage consortium	wastewater	wastewater metagenome	ERS5184606	ERX4600312	ERR4678688	Illumina	paired	Illumina NovaSeq 6000	Sub-Saharan Africa
COD	DTU_2018_934_1_MG_CO_BU_616	2018_nov_cod_01	Democratic Republic of the Congo	CD	Bukavu	-11.64	27.52	18	2018-11-17	Global sewage consortium	wastewater	wastewater metagenome	ERS5184603	ERX4600309	ERR4678685	Illumina	paired	Illumina NovaSeq 6000	Sub-Saharan Africa
COD	DTU_2018_941_1_MG_CO_BU_7_623	2018_nov_cod_06	Democratic Republic of the Congo	CD	Bukavu	-11.64	27.52	18	2018-12-18	Global sewage consortium	wastewater	wastewater metagenome	ERS5184608	ERX4600314	ERR4678690	Illumina	paired	Illumina NovaSeq 6000	Sub-Saharan Africa
COD	DTU_2018_942_1_MG_CO_BU_8_624	2018_nov_cod_07	Democratic Republic of the Congo	CD	Bukavu	-11.64	27.52	18	2018-12-18	Global sewage consortium	wastewater	wastewater metagenome	ERS5184609	ERX4600315	ERR4678691	Illumina	paired	Illumina NovaSeq 6000	Sub-Saharan Africa
COD	DTU_2018_943_1_MG_CO_BU_9_625	2018_nov_cod_08	Democratic Republic of the Congo	CD	Bukavu	-11.64	27.52	18	2018-12-18	Global sewage consortium	wastewater	wastewater metagenome	ERS5184610	ERX4600316	ERR4678692	Illumina	paired	Illumina NovaSeq 6000	Sub-Saharan Africa
COD	DTU_2018_939_1_MG_CO_BU_5_621	2018_nov_cod_05	Democratic Republic of the Congo	CD	Bukavu	-11.64	27.52	18	2018-12-18	Global sewage consortium	wastewater	wastewater metagenome	ERS5184607	ERX4600313	ERR4678689	Illumina	paired	Illumina NovaSeq 6000	Sub-Saharan Africa
